# Supplementary material
Source: Copernicus journal article supplement (doi:10.5194/egusphere-2026-2852)

## Atlas of European climate extremes since 1421

Supplement to the paper “Historical climate extremes in Europe and the connection between spring precipitation and summer heat”

*Laura Lipfert<sup>1,2</sup> Ralf Hand<sup>1,2,3</sup>, Angela-Maria Burgdorf<sup>1,2</sup>, Christian Pfister<sup>1,4</sup>, Heinz Wanner<sup>1,2</sup>, and Stefan Brönnimann<sup>1,2,\*</sup>*

<sup>1</sup> Institute of Geography, University of Bern, Bern, Switzerland

<sup>2</sup> Oeschger Centre for Climate Change Research, University of Bern, Bern, Switzerland

<sup>3</sup> Deutscher Wetterdienst DWD, Offenbach, Germany

<sup>4</sup> Institute of History, University of Bern, Bern, Switzerland

\* [Corresponding author: stefan.broennimann@unibe.ch](mailto:stefan.broennimann@unibe.ch)

The following atlas shows maps of anomalies relative to the period 1500-1900 for the ensemble means of 2 m temperature, 500 hPa geopotential height (overlaid contours), precipitation, and sea-level pressure (overlaid contours). Each season includes these four fields for all three data sets (ModE-RA, ModE-RAclim, ModE-Sim). All maps of all seasons and all data sets are shown on the same color scale and contour spacing. The contour distance is 1 hPa for SLP and 10 gpm for 500 hPa GPH (negatives dashed, zero not shown). Stippling marks regions where at least 15 out of 20 members agree in sign. Minima and maxima for temperature and precipitation are indicated.

# Winter (DJF) 1425

## ModE-RA

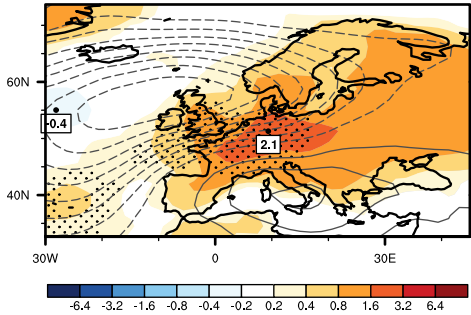

## ModE-Sim

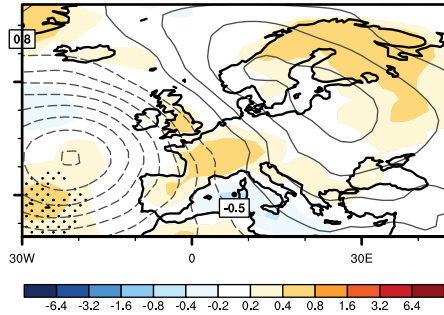

## ModE-RAClim

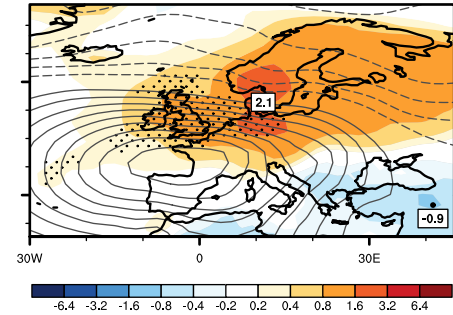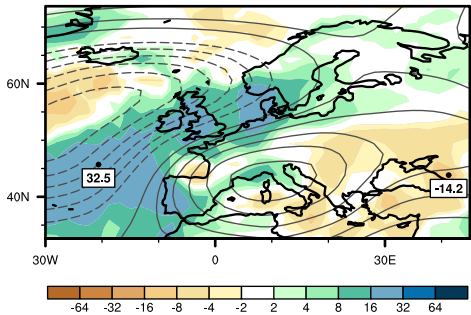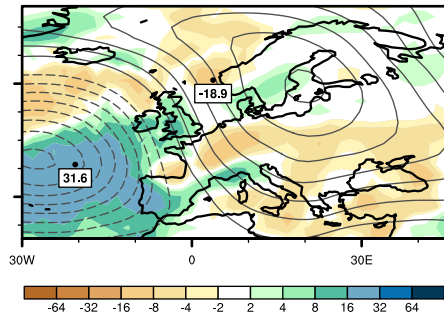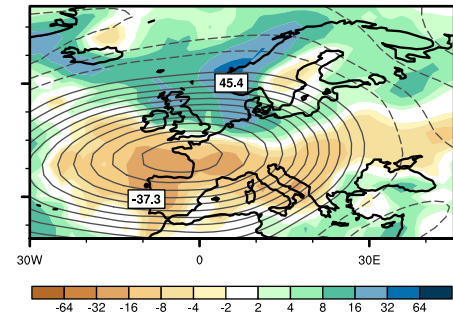

# Winter (DJF) 1432

## ModE-RA

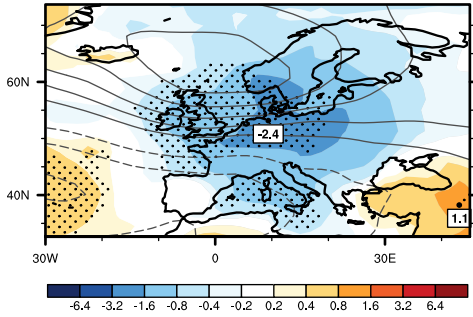

## ModE-Sim

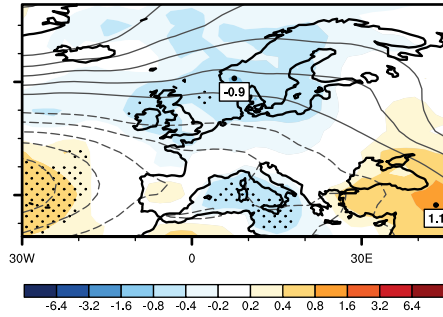

## ModE-RAClim

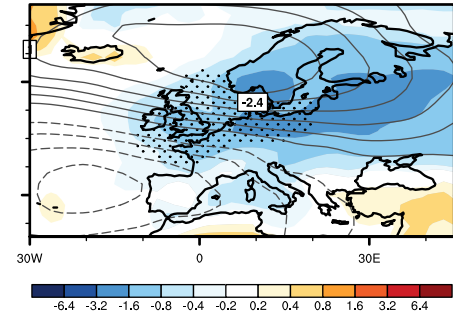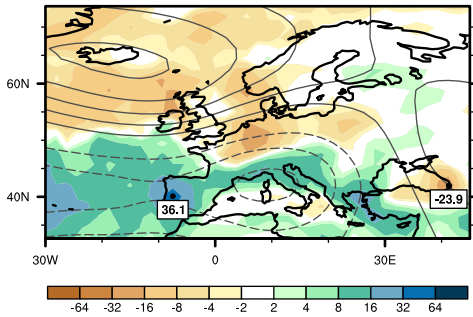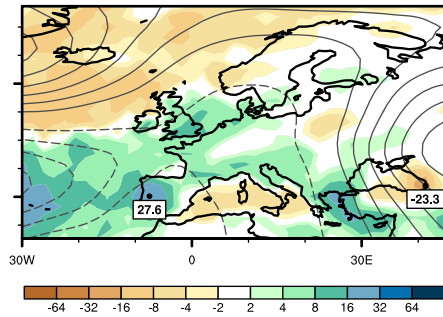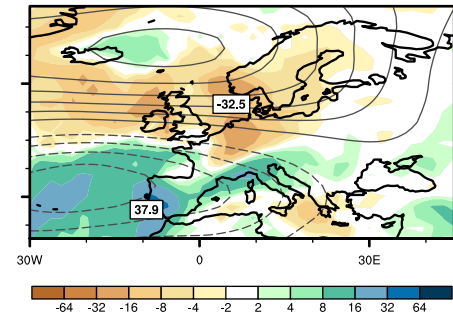

# Winter (DJF) 1435

## ModE-RA

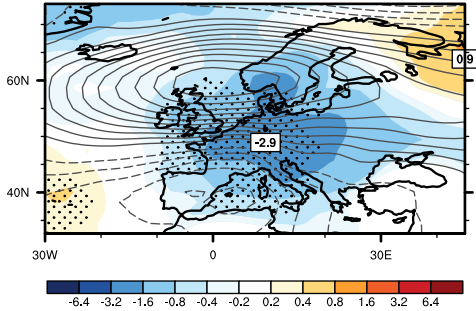

## ModE-Sim

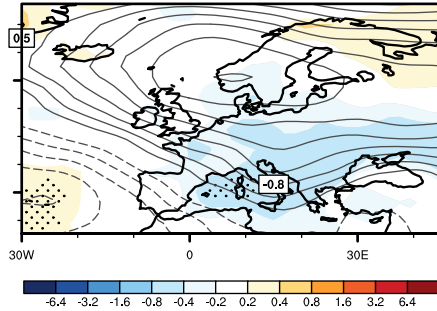

## ModE-RAClim

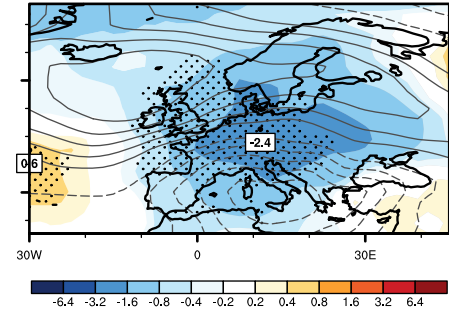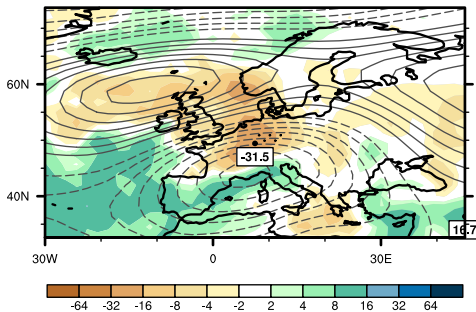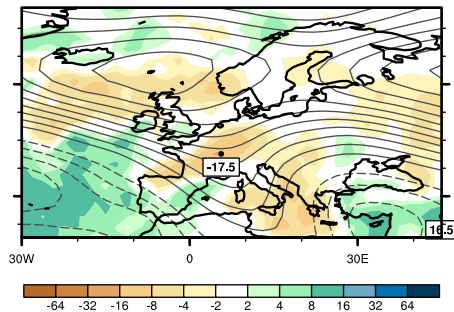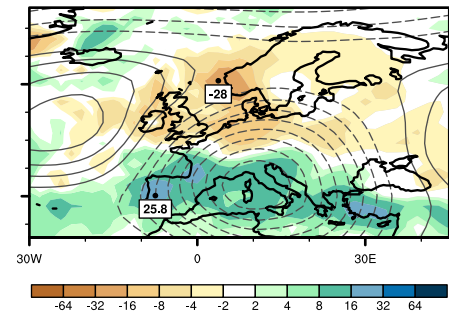

# Winter (DJF) 1473

## ModE-RA

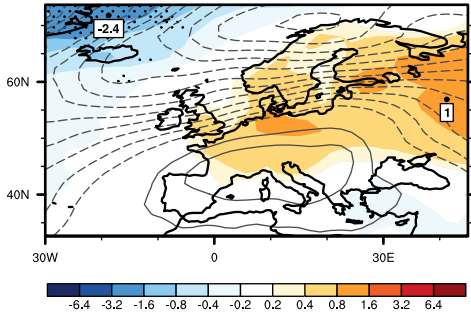

## ModE-Sim

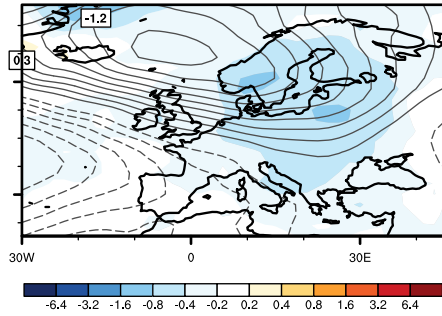

## ModE-RAClim

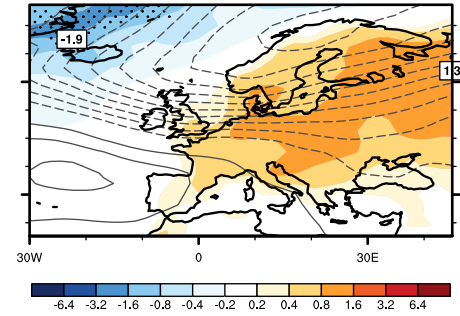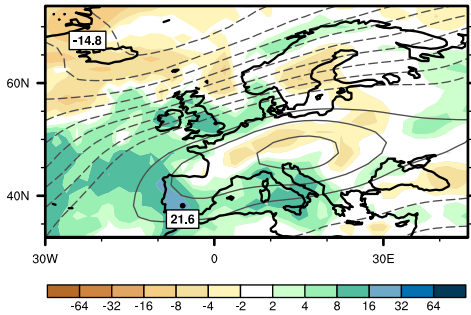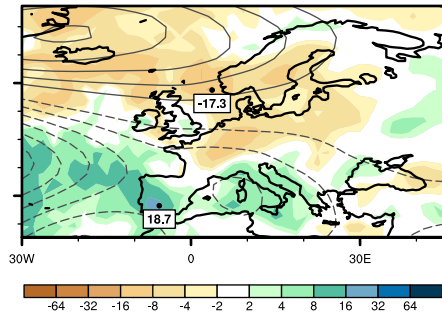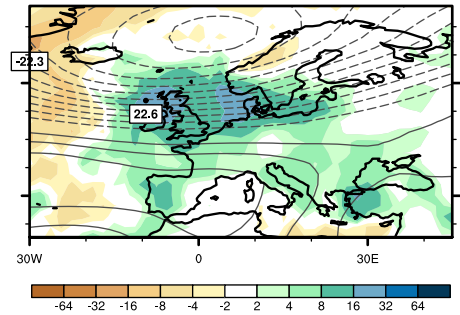

# Winter (DJF) 1474

### ModE-RA

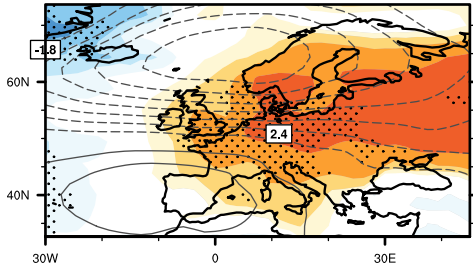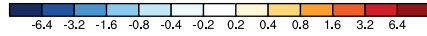

### ModE-Sim

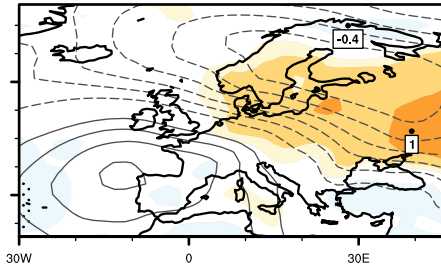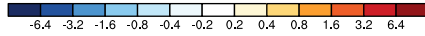

### ModE-RAClim

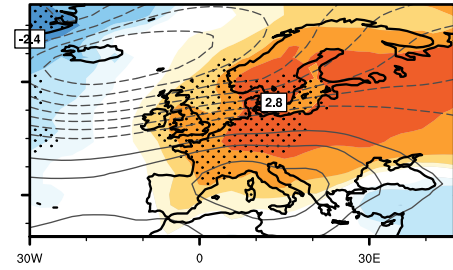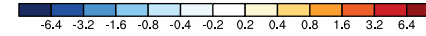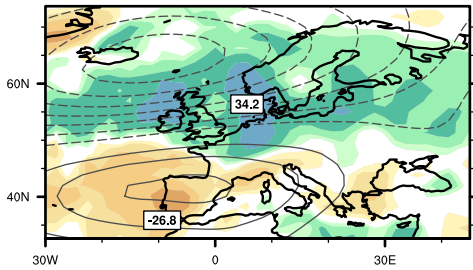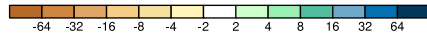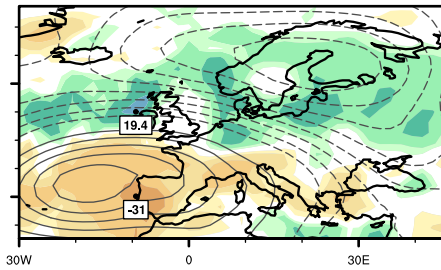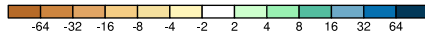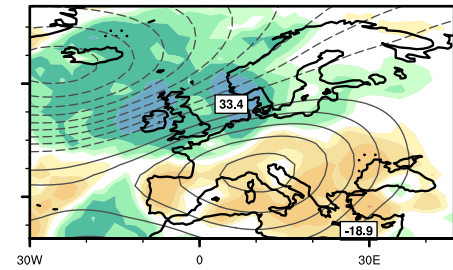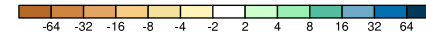

# Winter (DJF) 1491

## ModE-RA

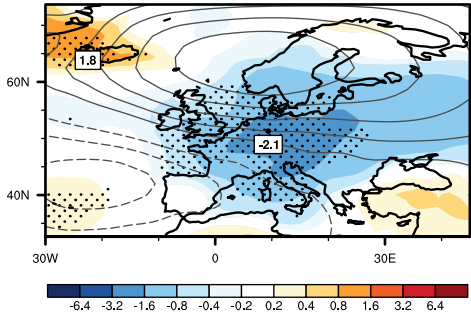

## ModE-Sim

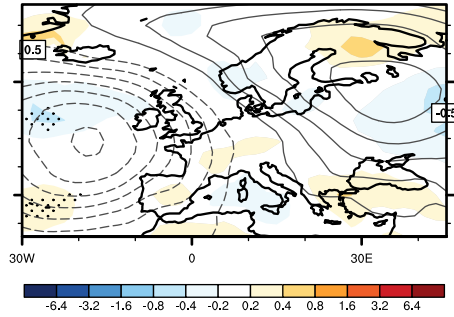

## ModE-RAClim

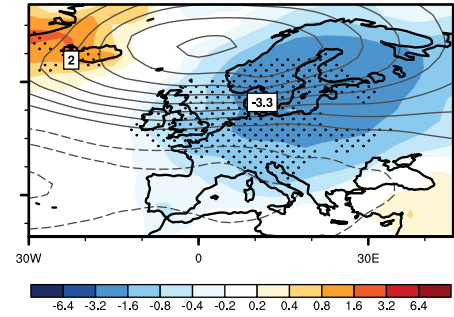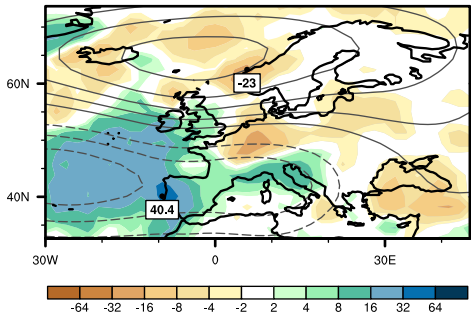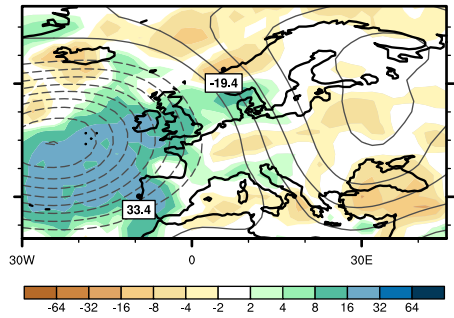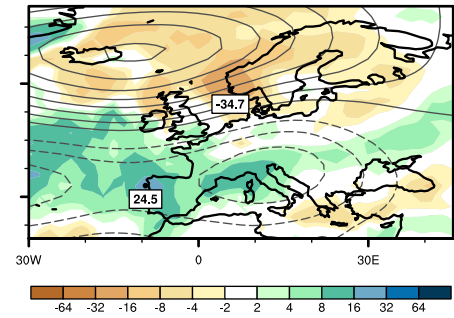

# Winter (DJF) 1521

## ModE-RA

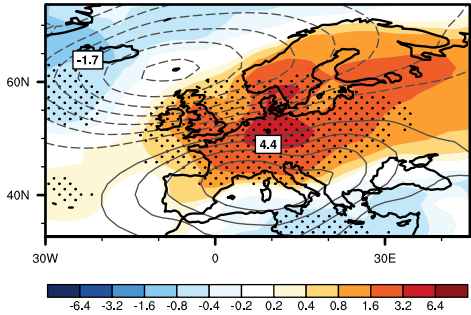

## ModE-Sim

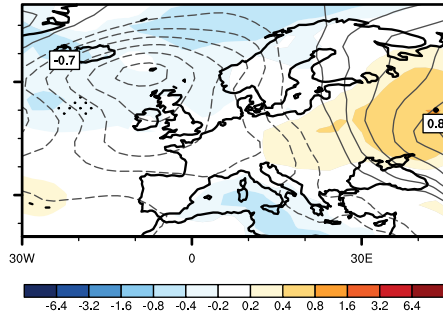

## ModE-RAClim

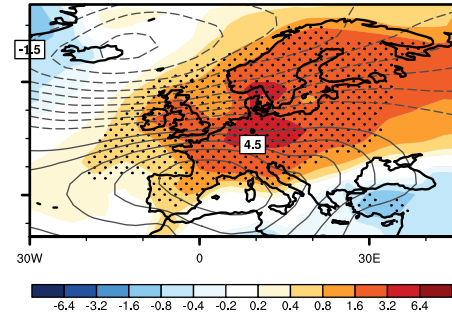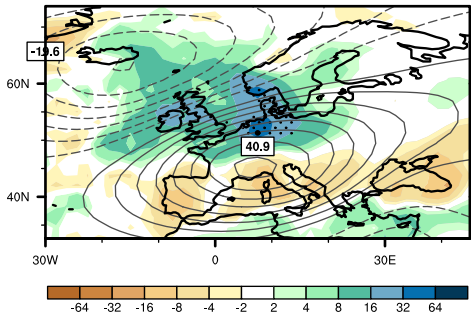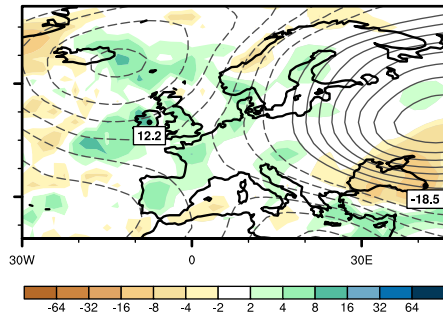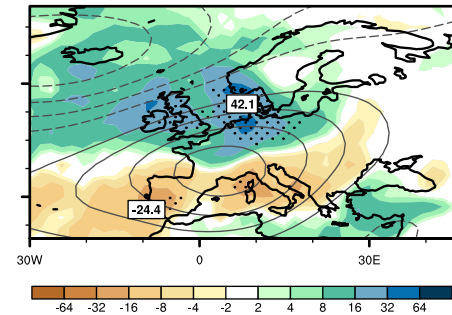

# Winter (DJF) 1530

## ModE-RA

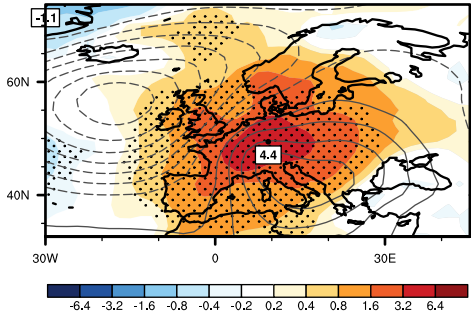

## ModE-Sim

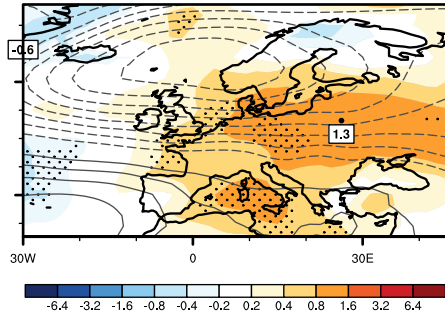

## ModE-RAClim

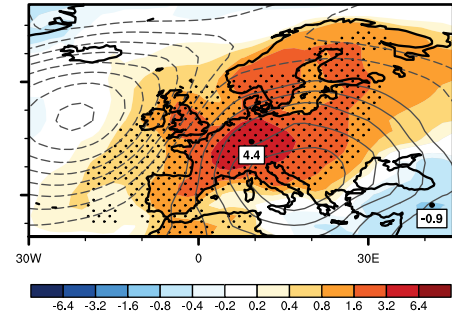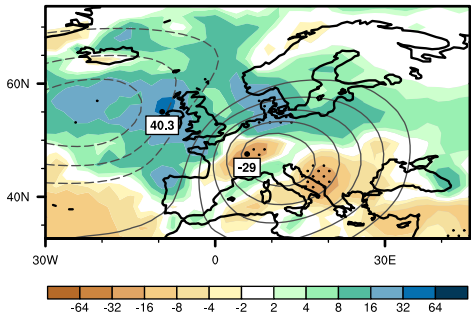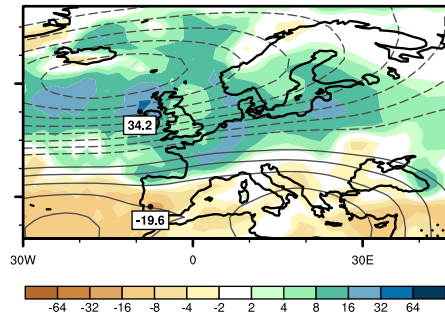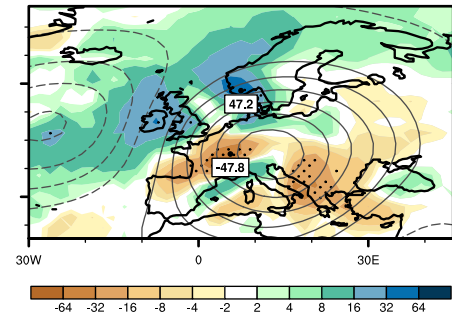

# Winter (DJF) 1565

## ModE-RA

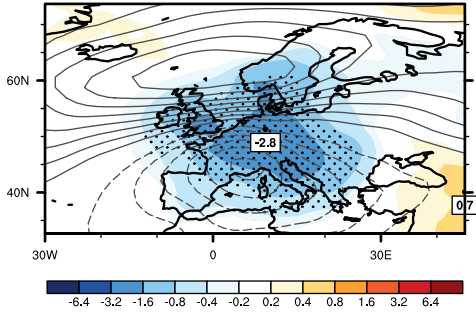

## ModE-Sim

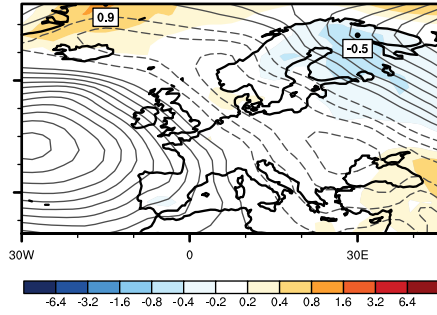

## ModE-RAClim

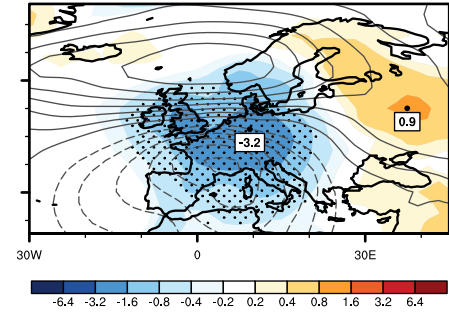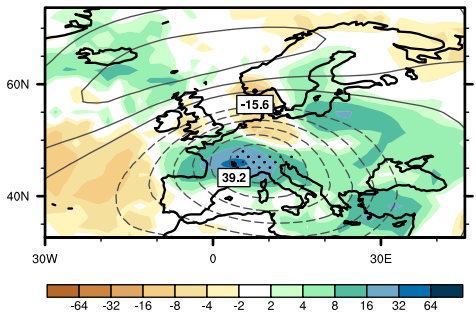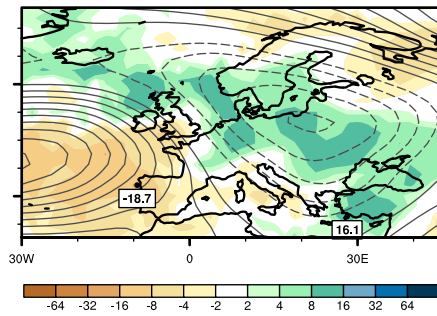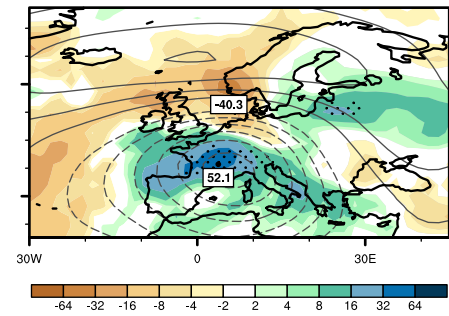

# Winter (DJF) 1573

## ModE-RA

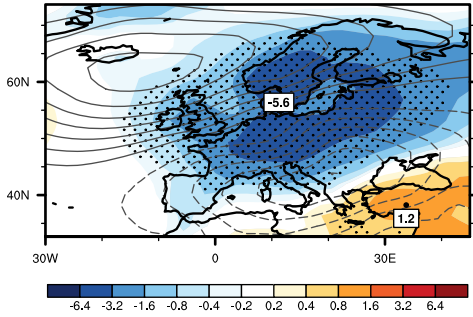

## ModE-Sim

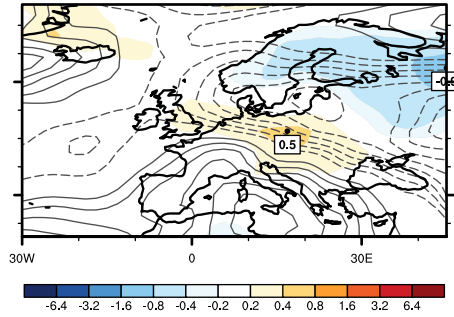

## ModE-RAClim

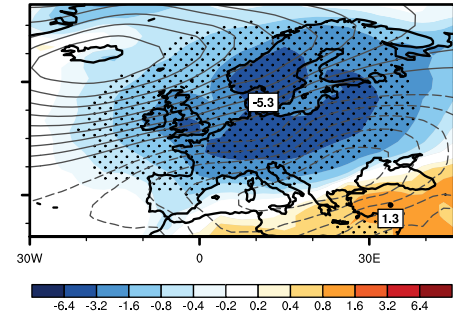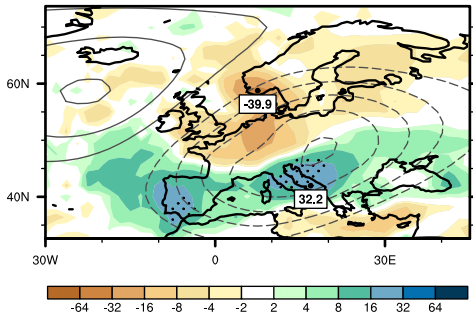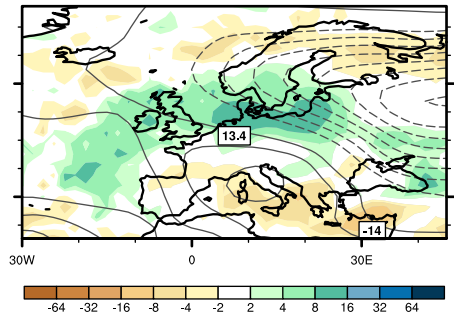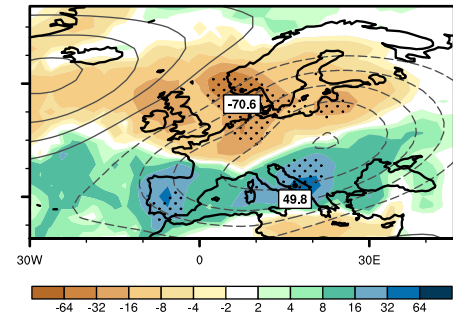

# Winter (DJF) 1595

## ModE-RA

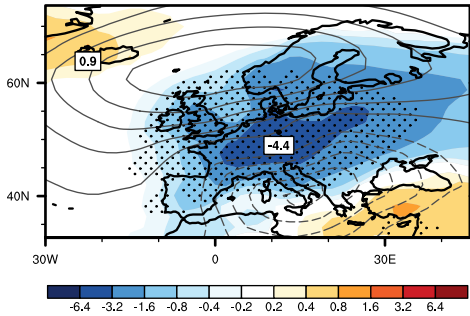

## ModE-Sim

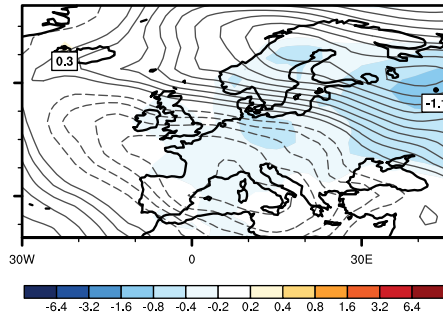

## ModE-RAClim

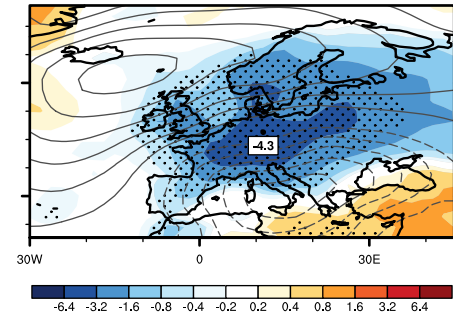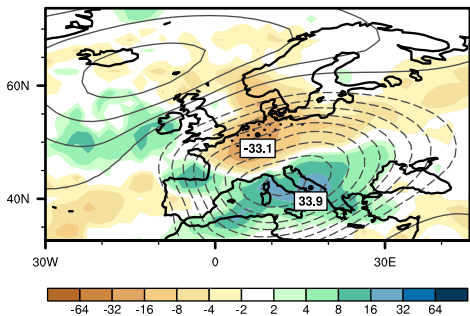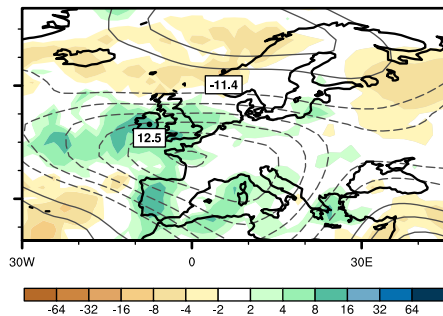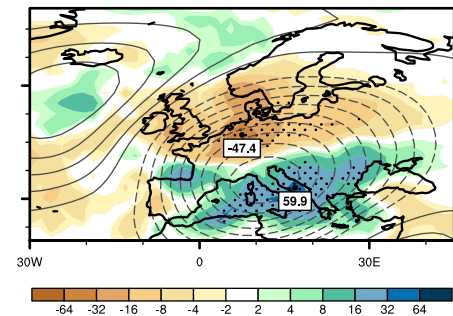

# Winter (DJF) 1600

## ModE-RA

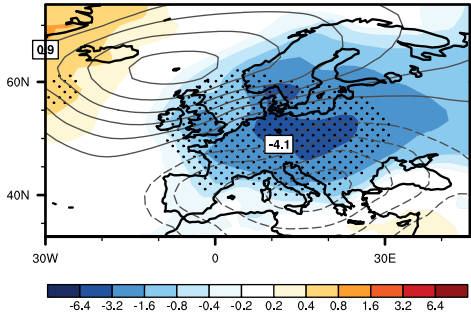

## ModE-Sim

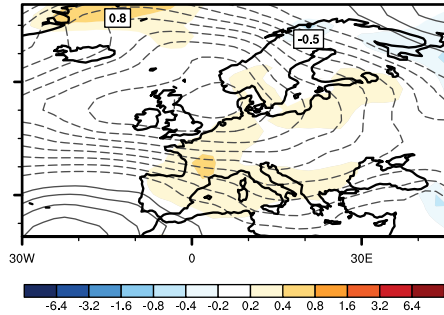

## ModE-RAClim

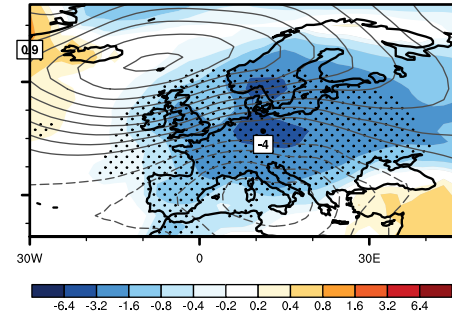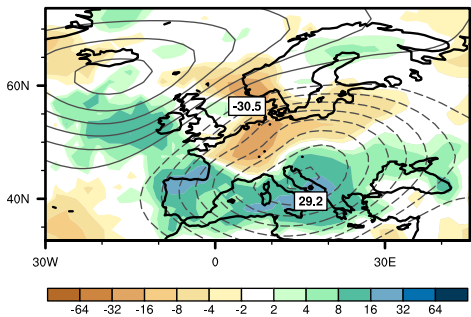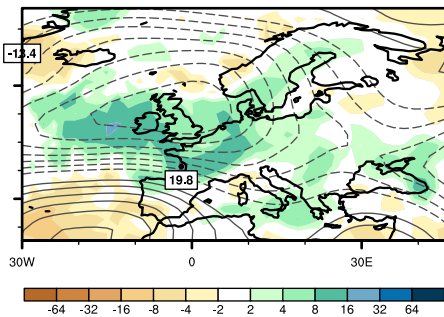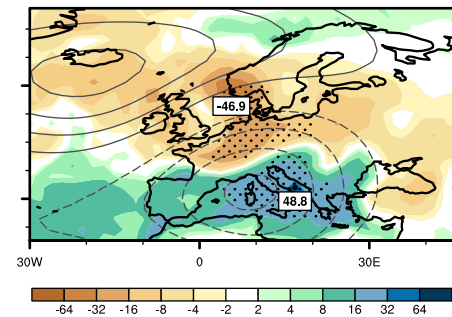

# Winter (DJF) 1607

## ModE-RA

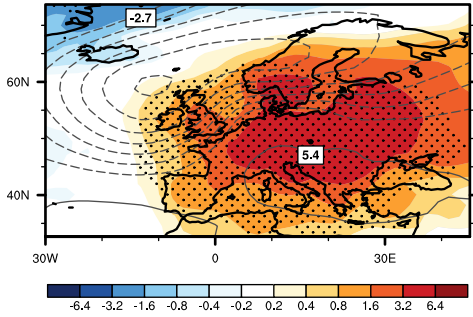

## ModE-Sim

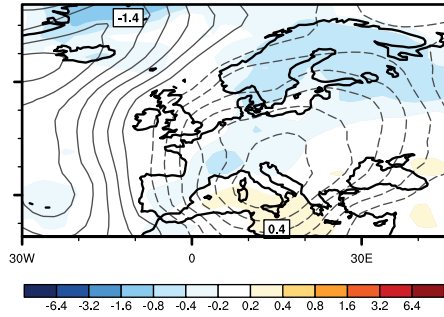

## ModE-RAClim

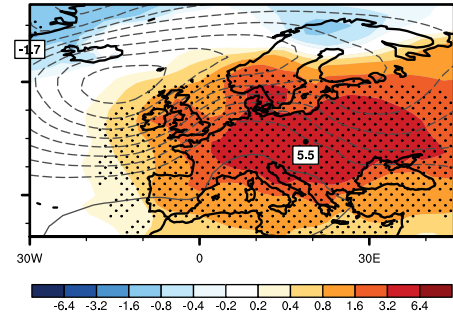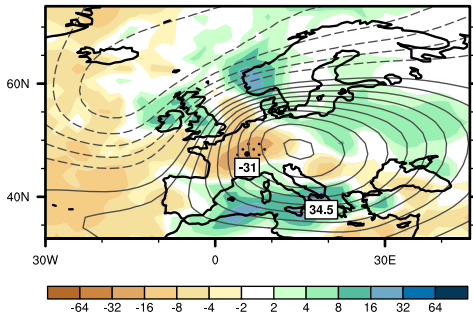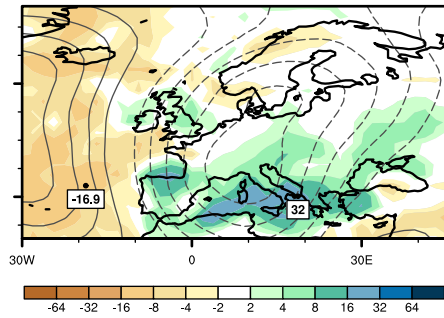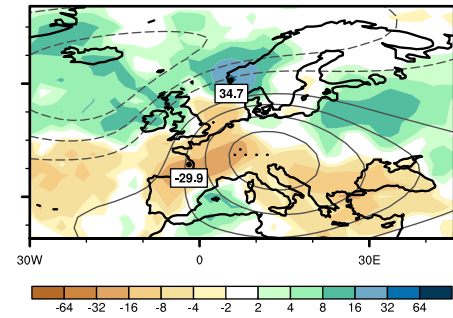

# Winter (DJF) 1608

## ModE-RA

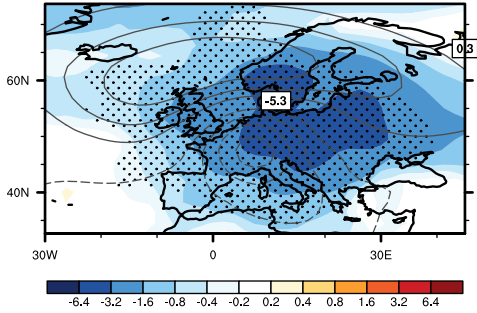

## ModE-Sim

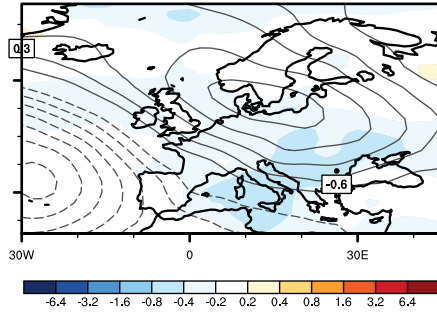

## ModE-RAClim

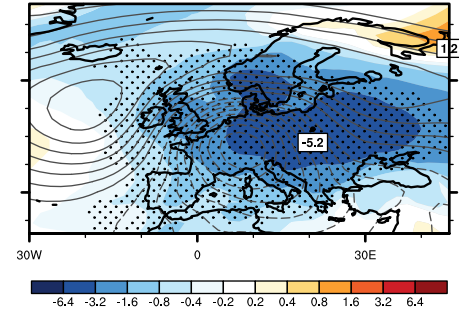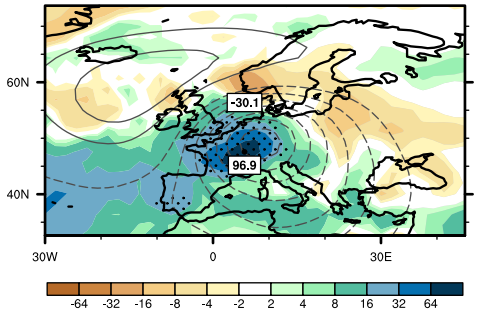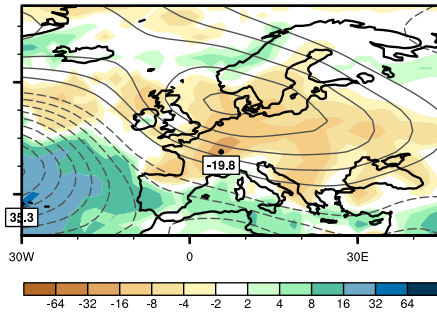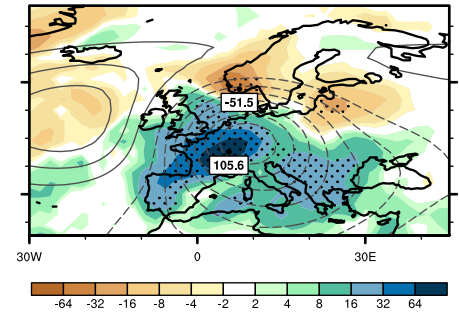

# Winter (DJF) 1617

## ModE-RA

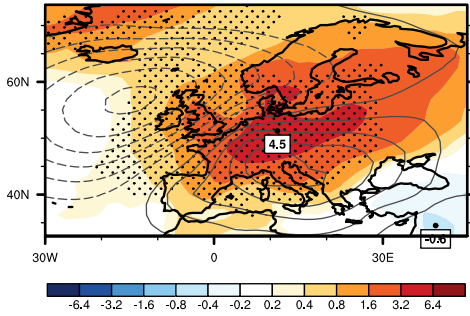

## ModE-Sim

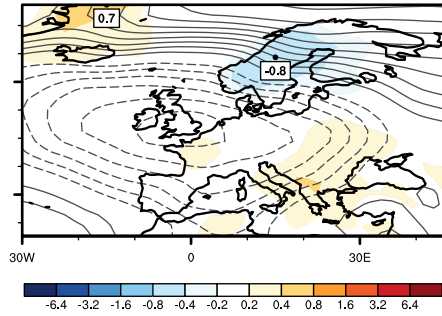

## ModE-RAClim

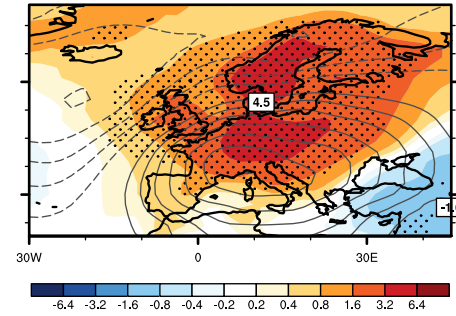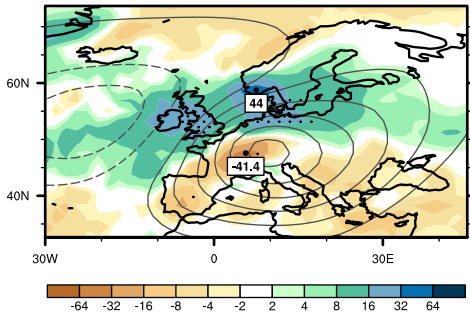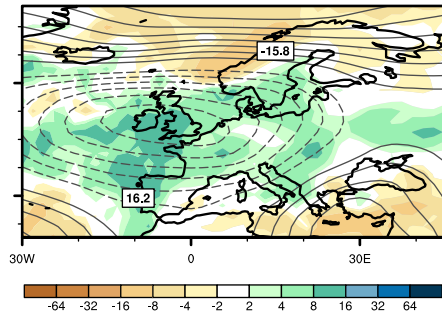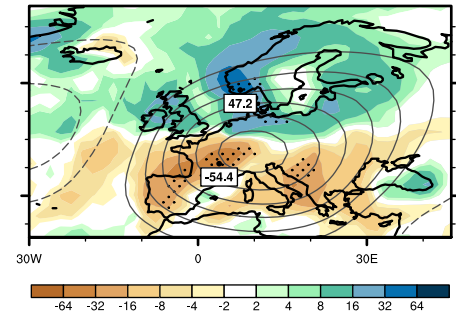

# Winter (DJF) 1684

## ModE-RA

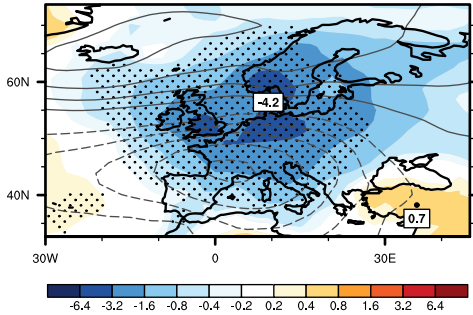

## ModE-Sim

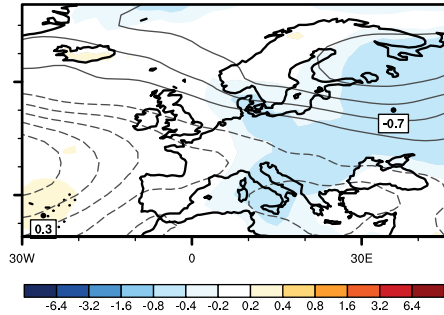

## ModE-RAClim

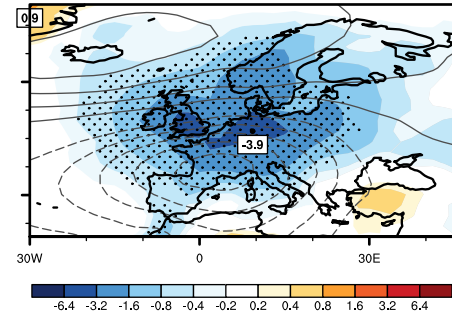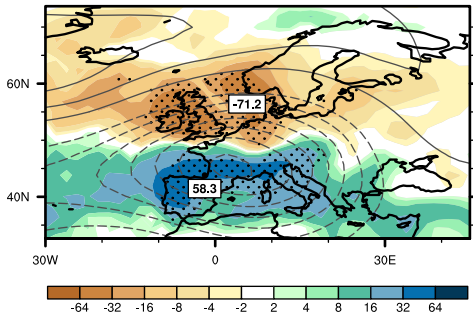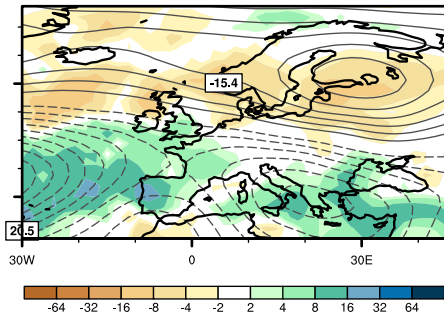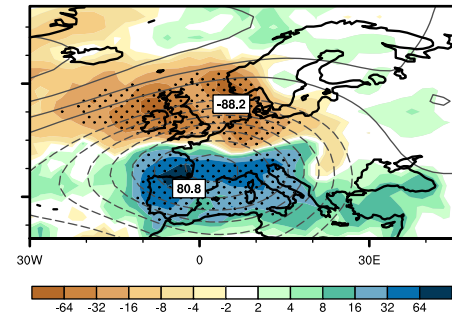

# Winter (DJF) 1697

## ModE-RA

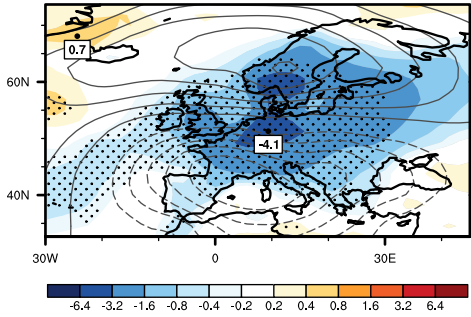

## ModE-Sim

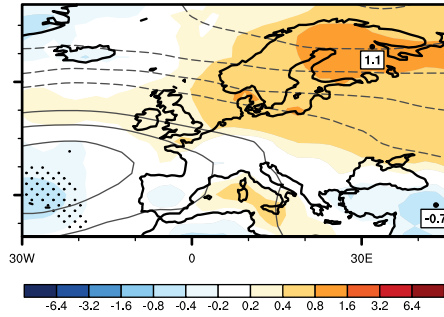

## ModE-RAClim

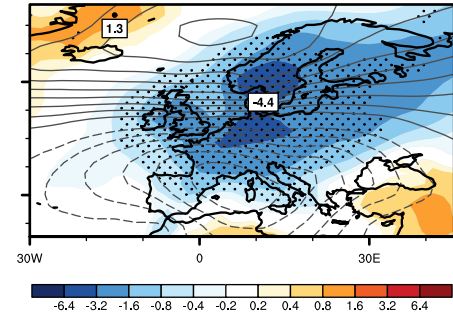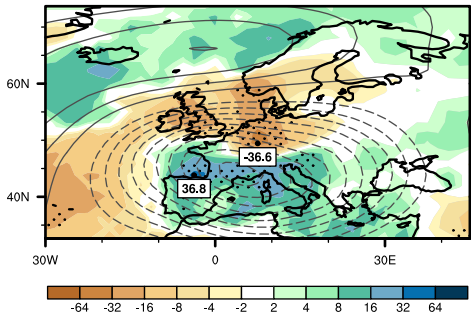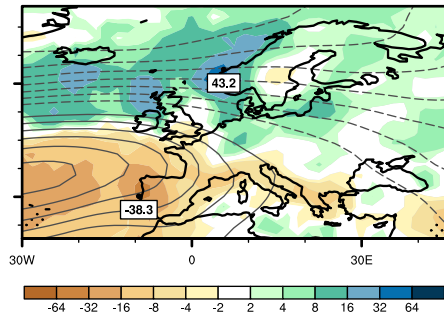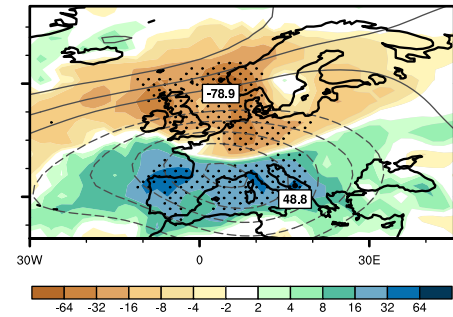

# Winter (DJF) 1709

## ModE-RA

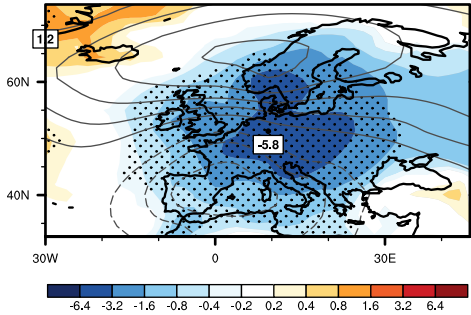

## ModE-Sim

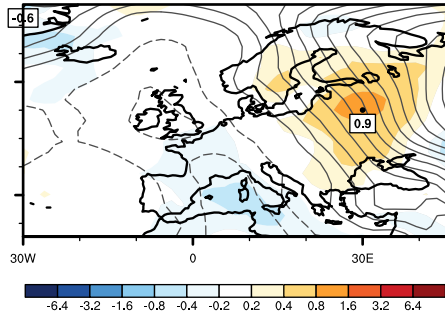

## ModE-RAClim

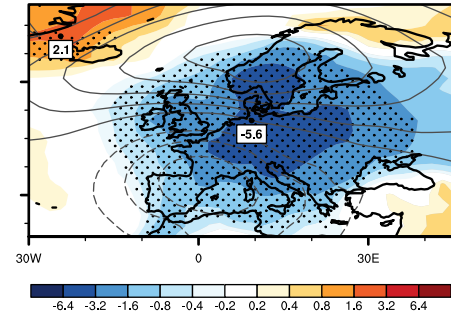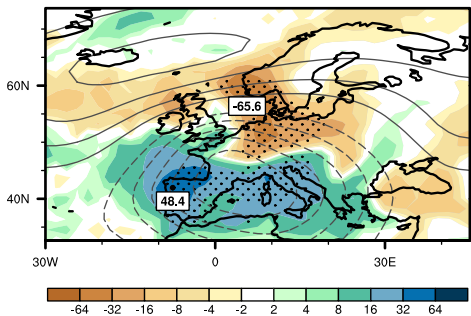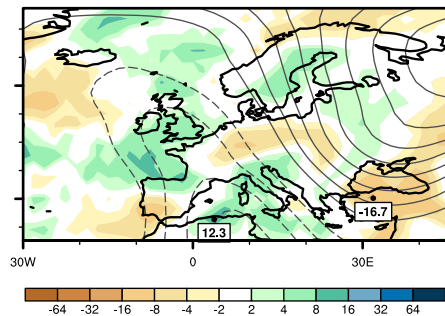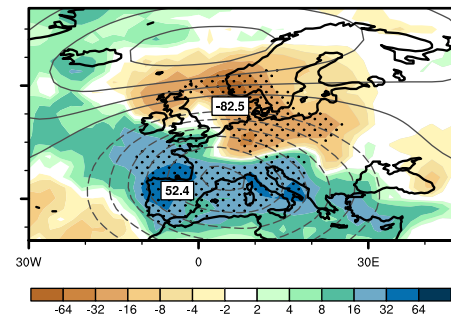

# Winter (DJF) 1740

### ModE-RA

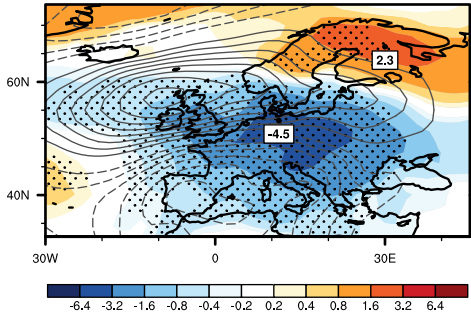

### ModE-Sim

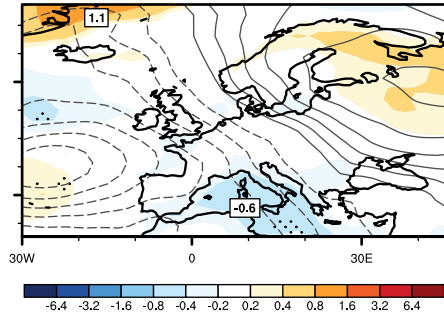

### ModE-RAClim

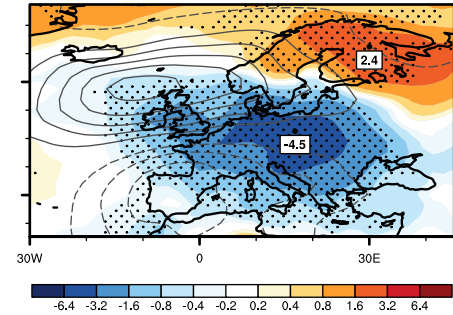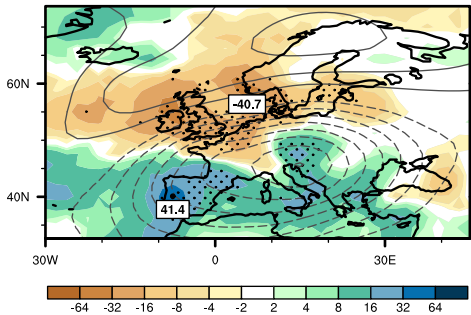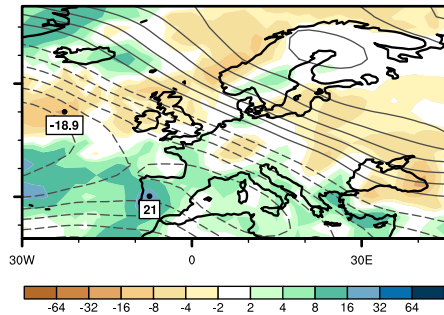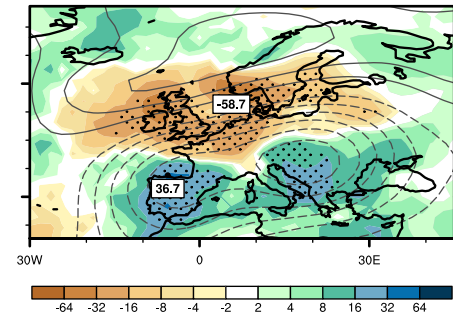

# Winter (DJF) 1784

## ModE-RA

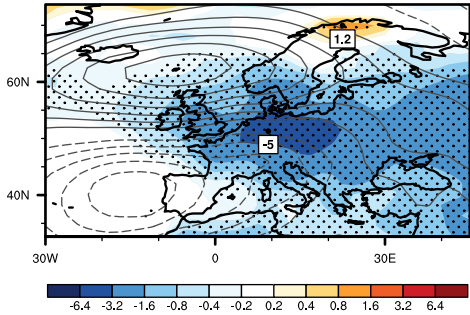

## ModE-Sim

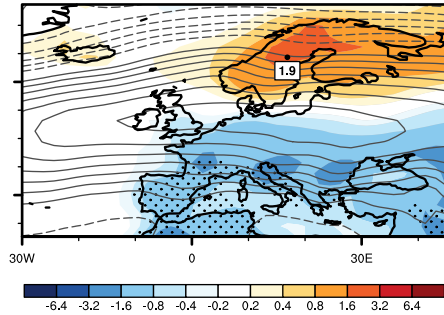

## ModE-RAClim

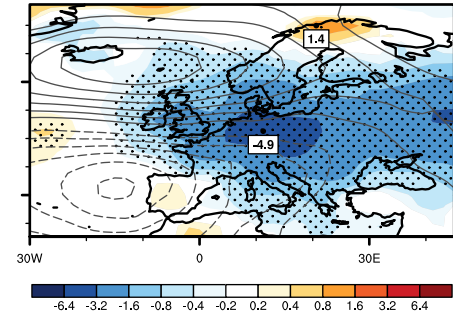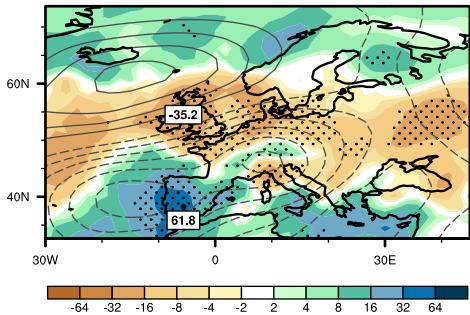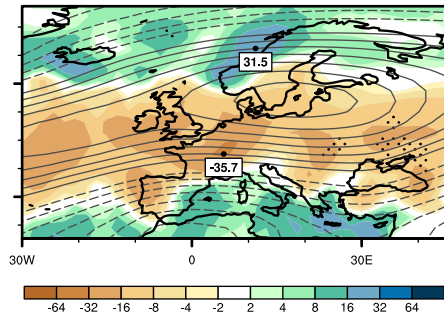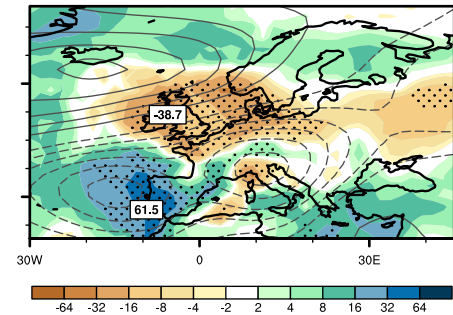

# Winter (DJF) 1789

## ModE-RA

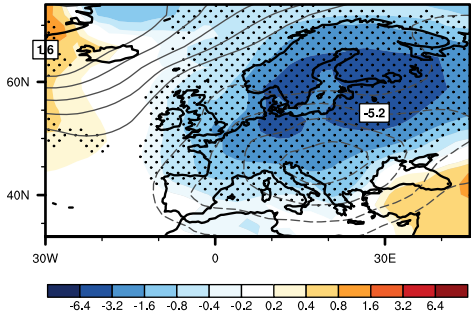

## ModE-Sim

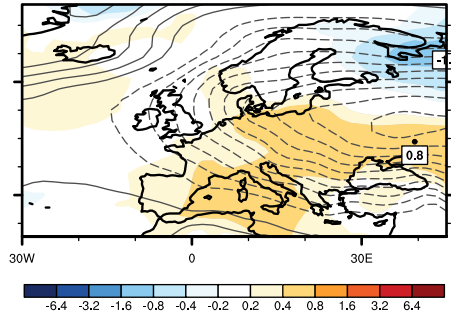

## ModE-RAClim

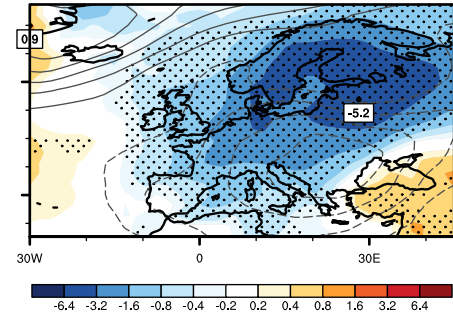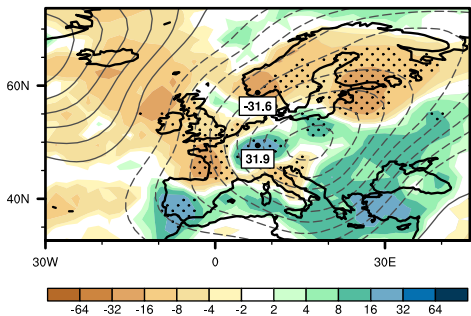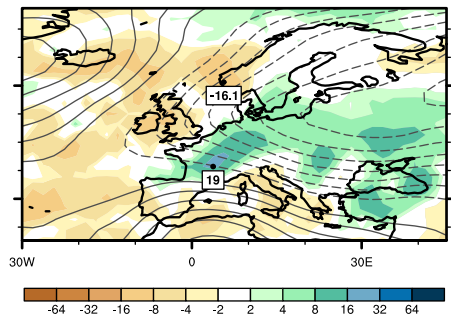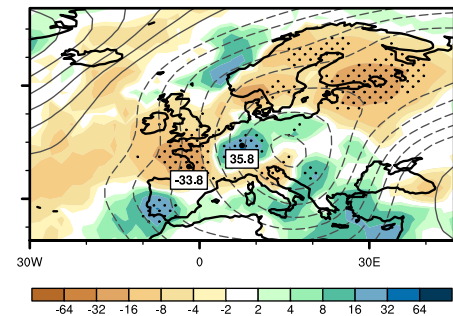

# Winter (DJF) 1796

### ModE-RA

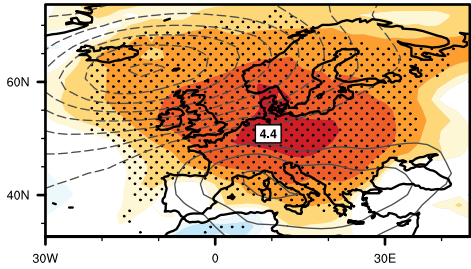

### ModE-Sim

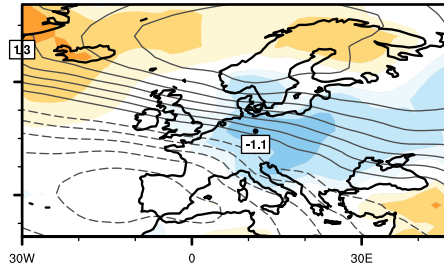

### ModE-RAClim

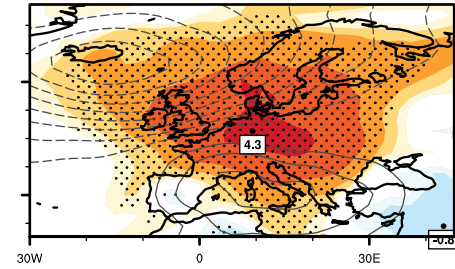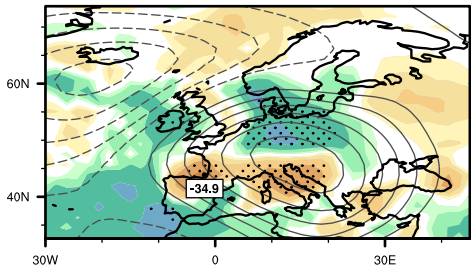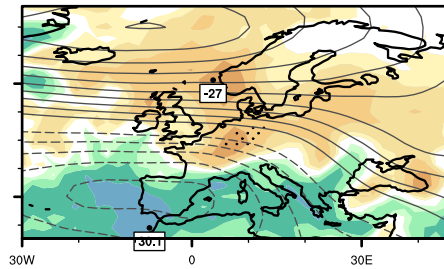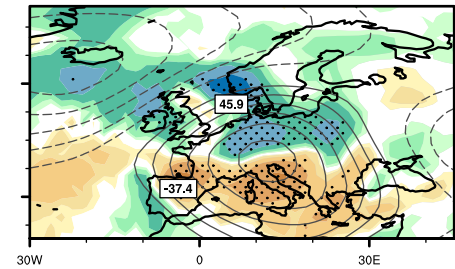

# Winter (DJF) 1830

## ModE-RA

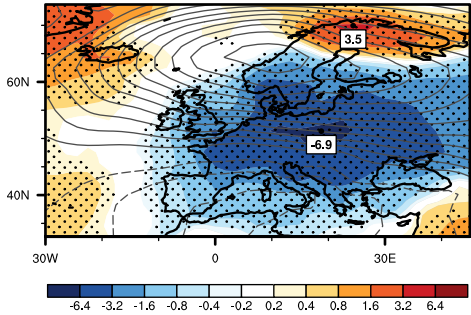

## ModE-Sim

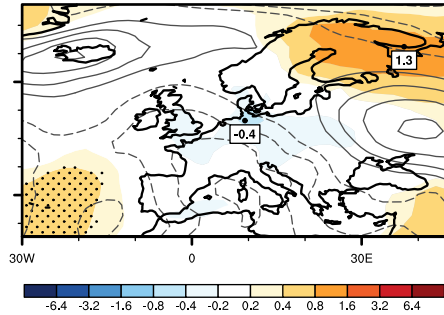

## ModE-RAClim

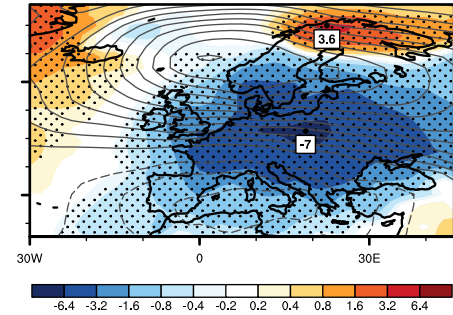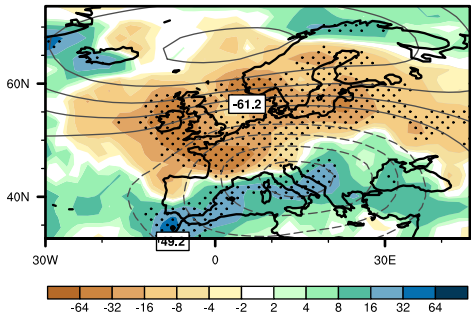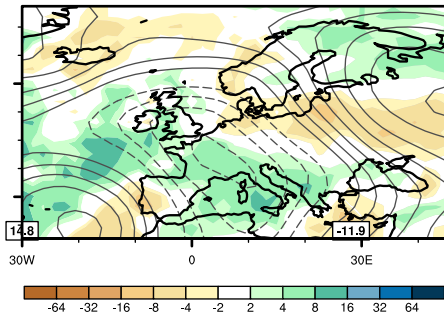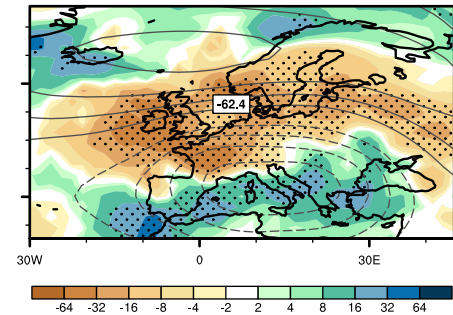

# Winter (DJF) 1834

## ModE-RA

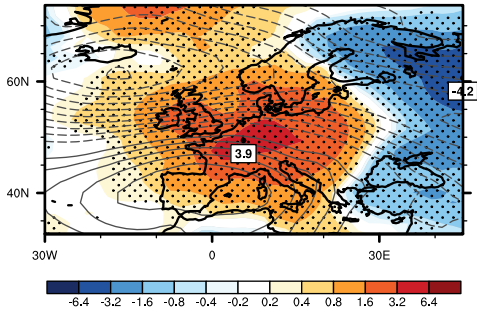

## ModE-Sim

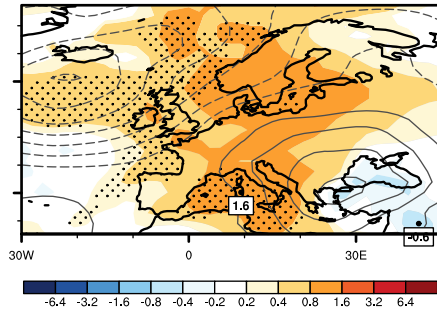

## ModE-RAclim

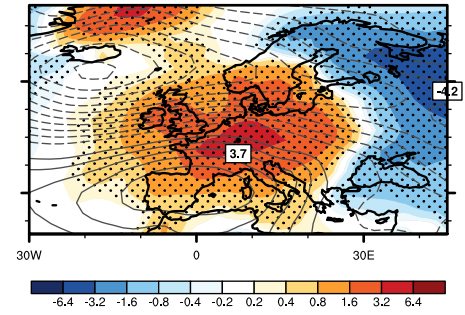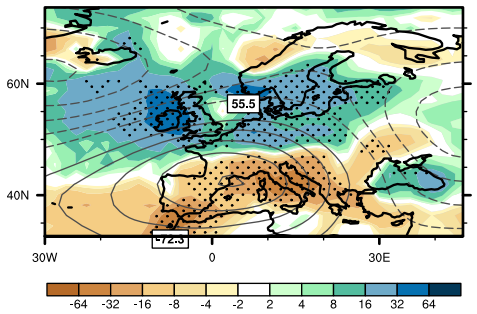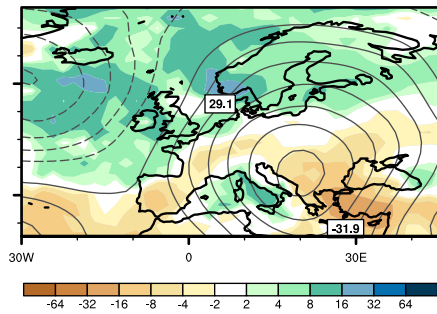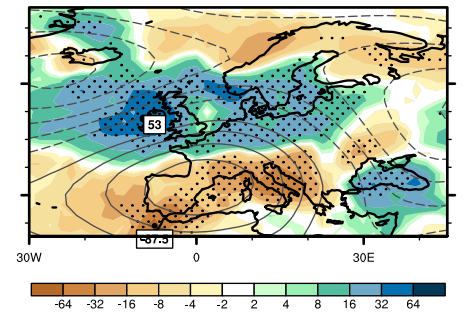

# Winter (DJF) 1880

### ModE-RA

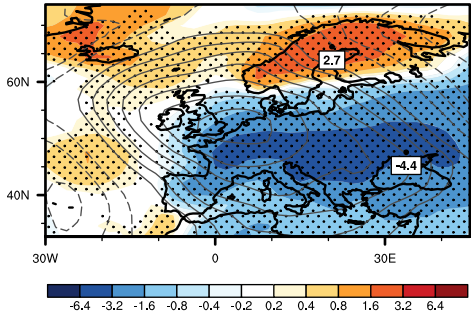

### ModE-Sim

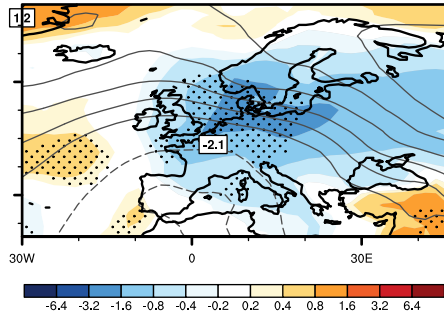

### ModE-RAClim

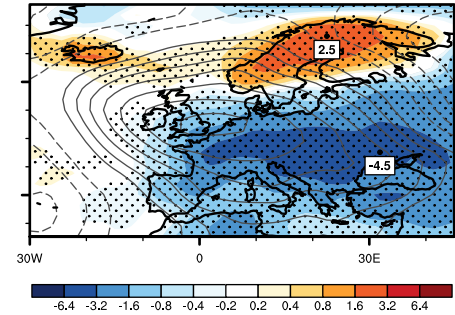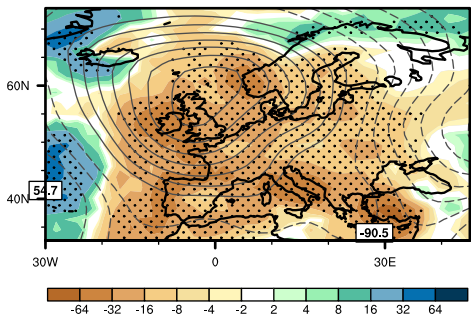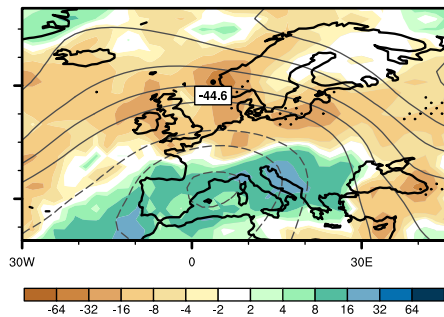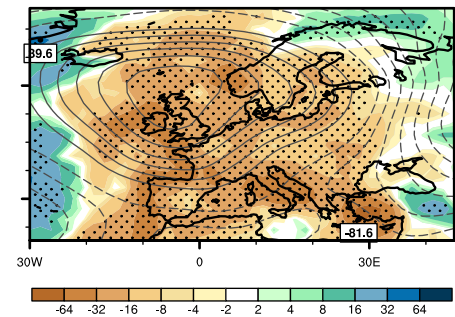

# Winter (DJF) 1891

### ModE-RA

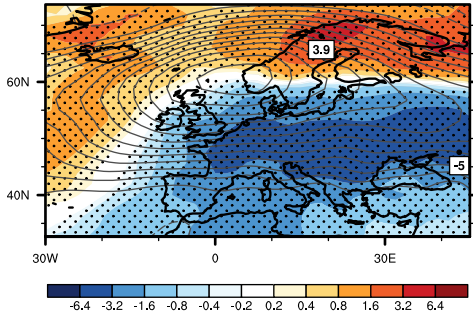

### ModE-Sim

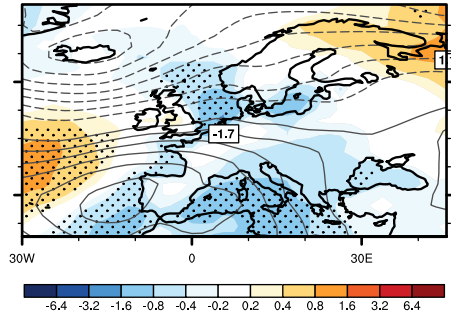

### ModE-RAClim

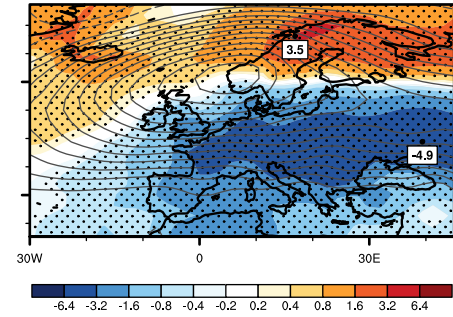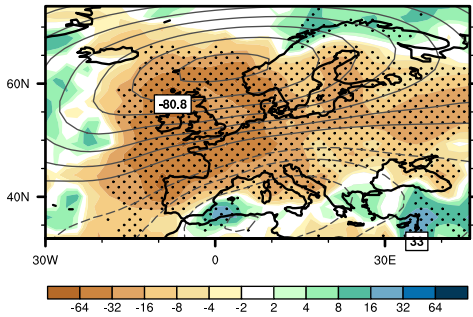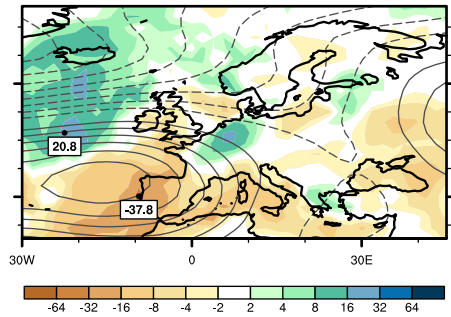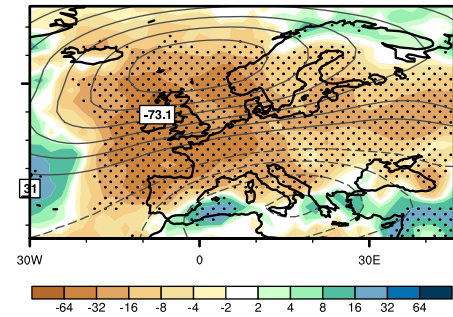

# Winter (DJF) 1916

## ModE-RA

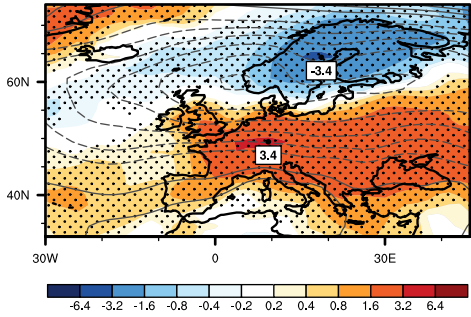

## ModE-Sim

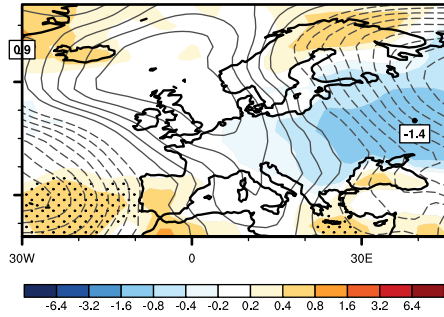

## ModE-RAClim

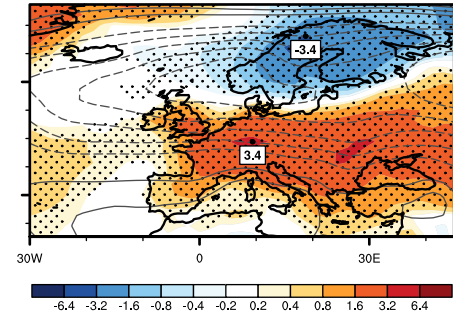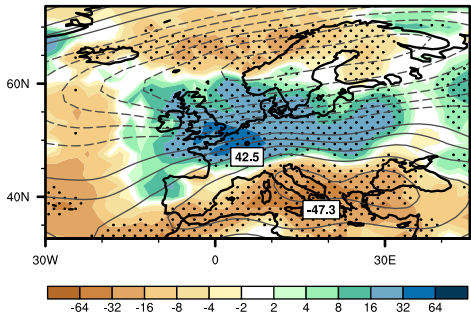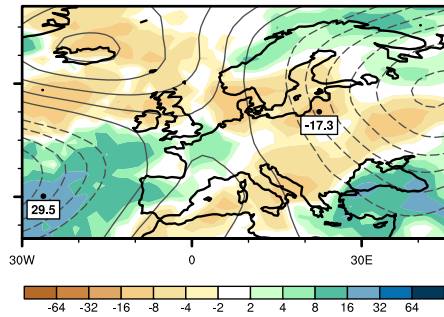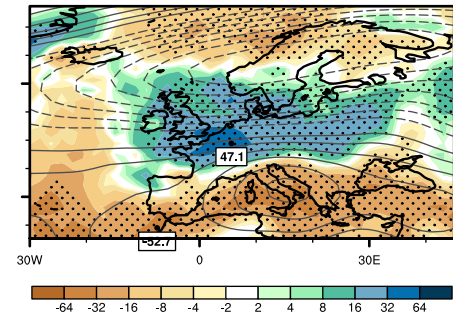

# Winter (DJF) 1929

## ModE-RA

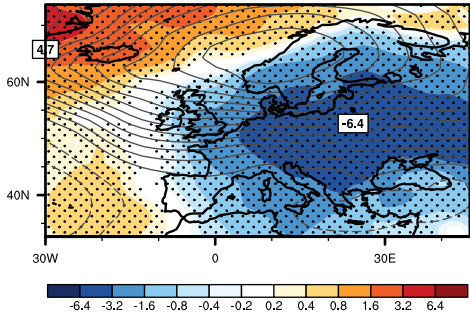

## ModE-Sim

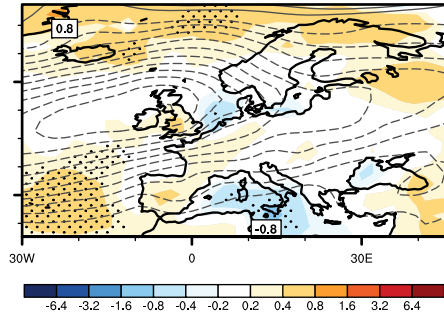

## ModE-RAClim

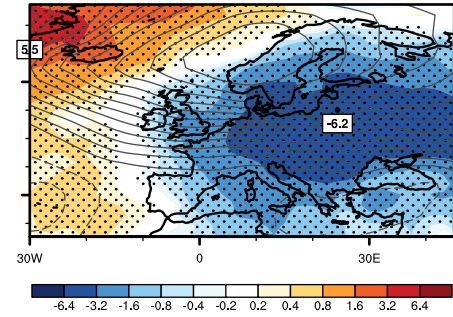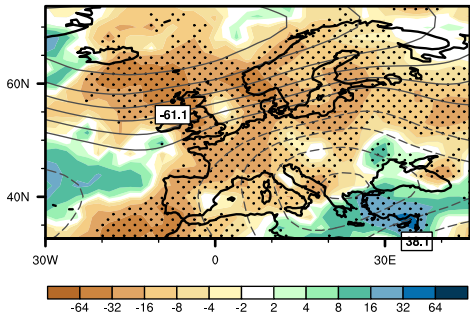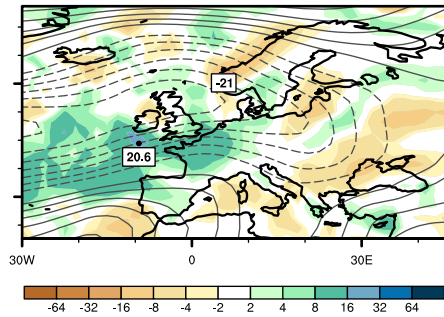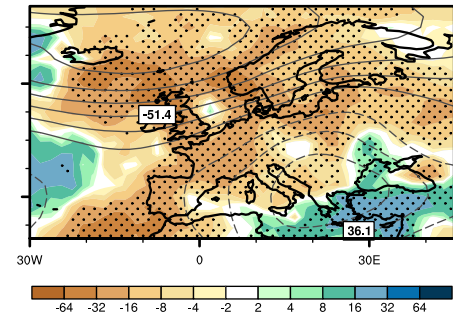

# Winter (DJF) 1941

## ModE-RA

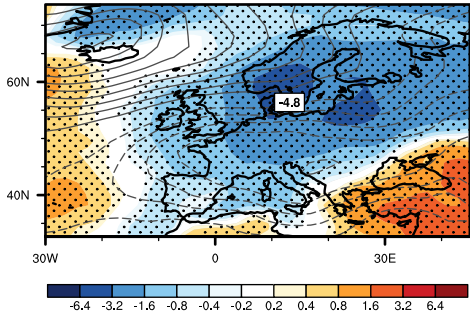

## ModE-Sim

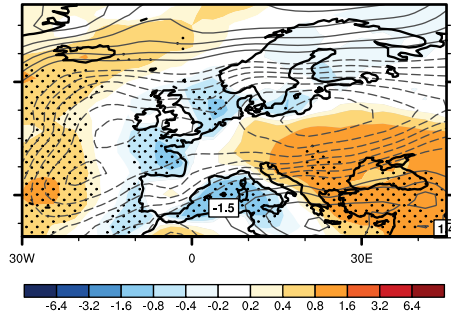

## ModE-RAClim

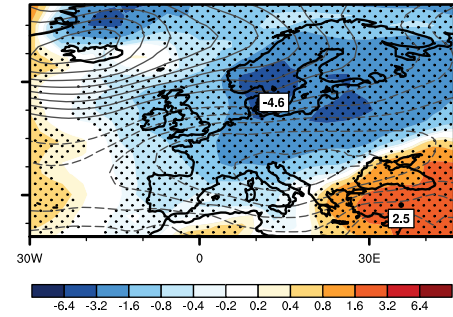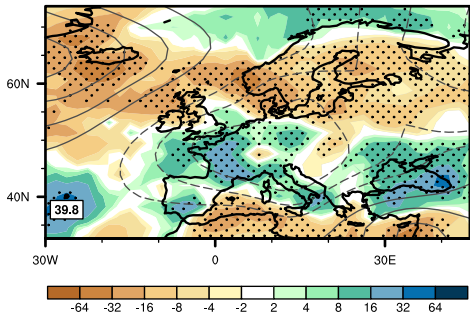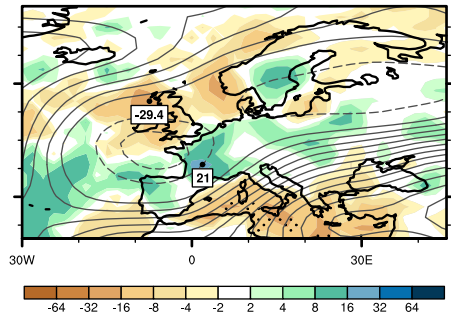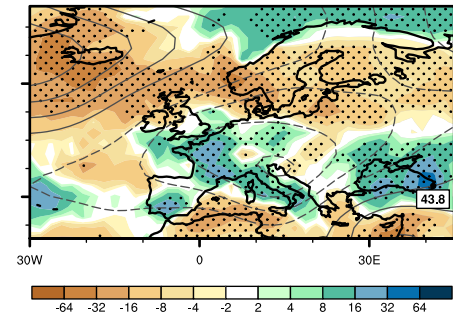

# Winter (DJF) 1956

## ModE-RA

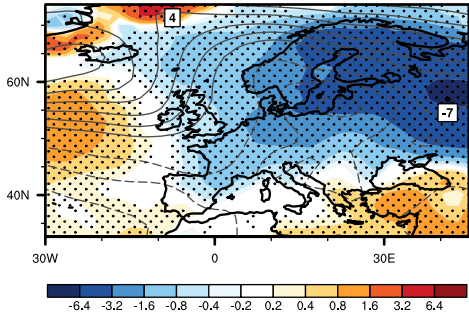

## ModE-Sim

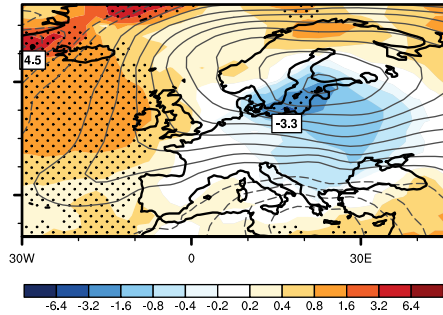

## ModE-RAClim

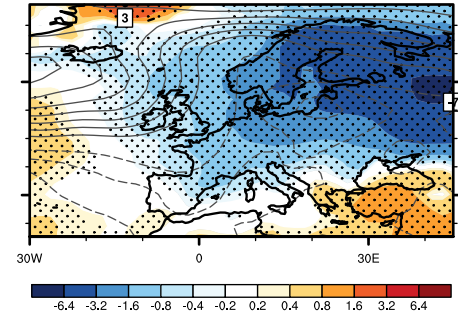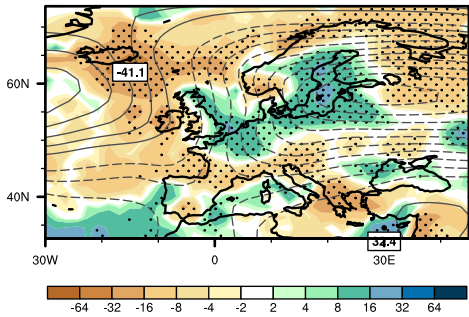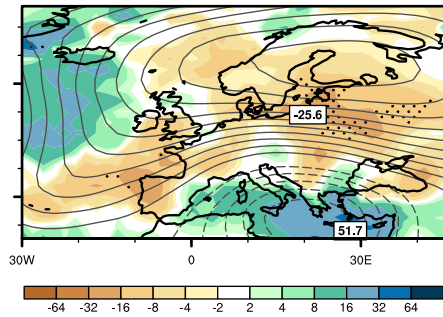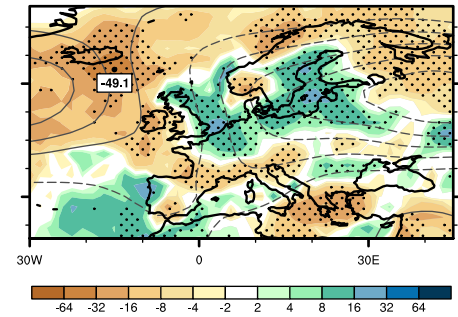

# Spring (MAM) 1435

## ModE-RA

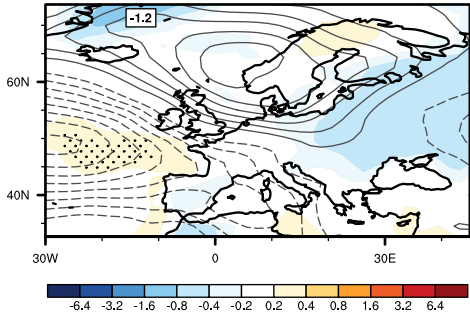

## ModE-Sim

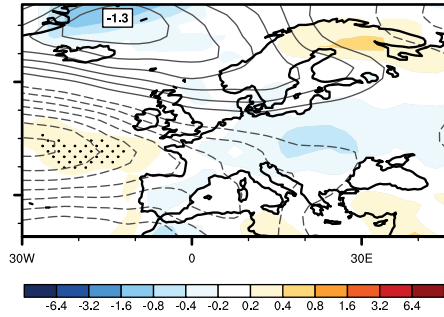

## ModE-RAClim

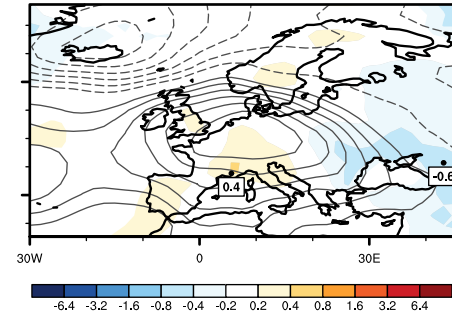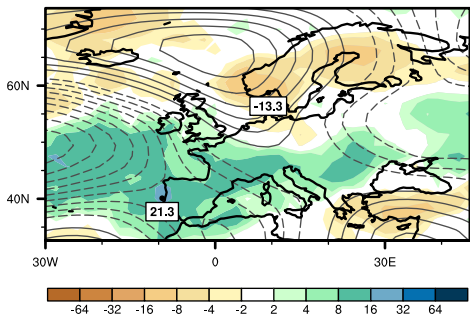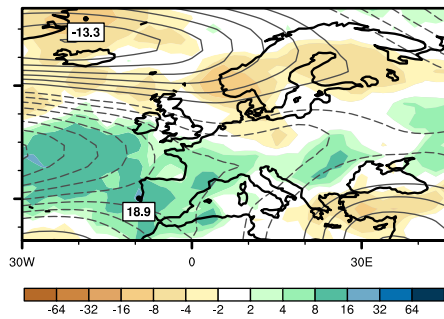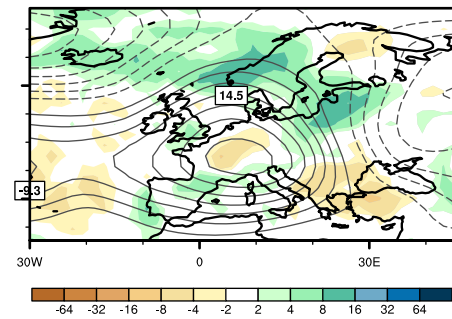

# Spring (MAM) 1443

## ModE-RA

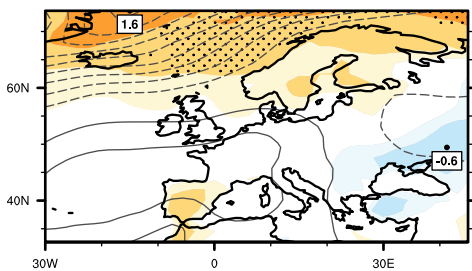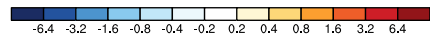

## ModE-Sim

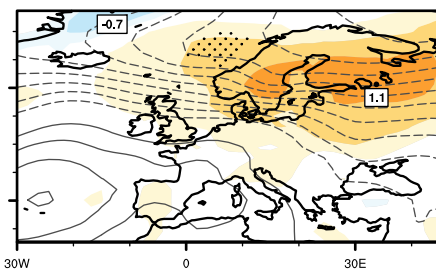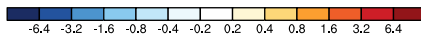

## ModE-RAClim

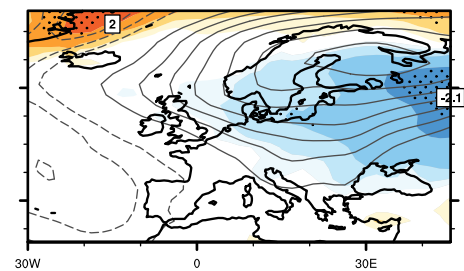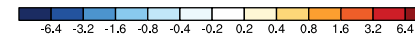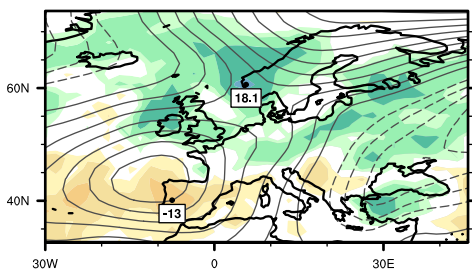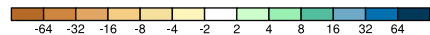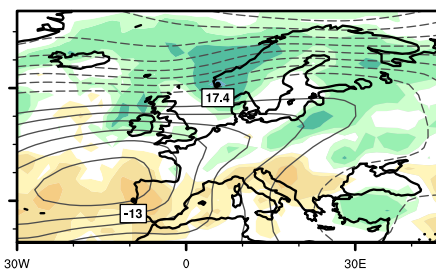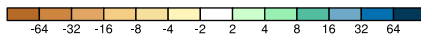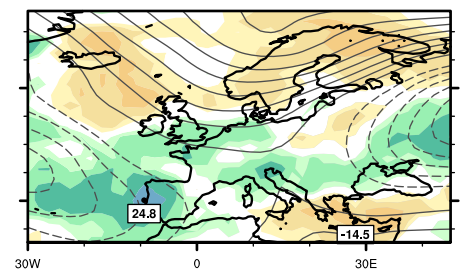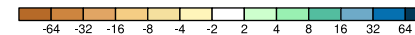

# Spring (MAM) 1473

## ModE-RA

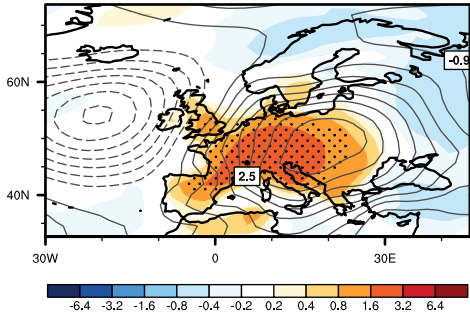

## ModE-Sim

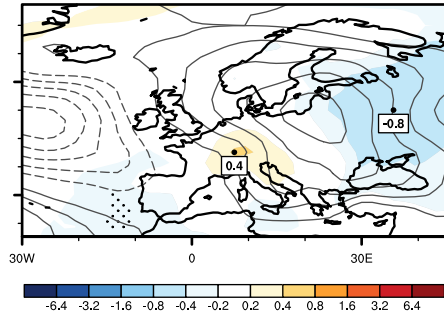

## ModE-RAClim

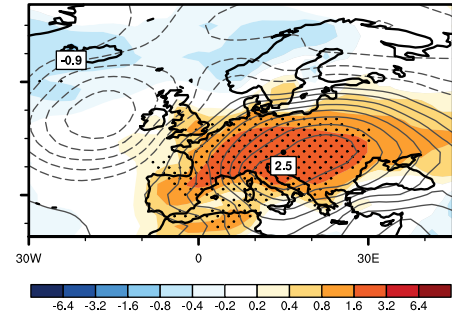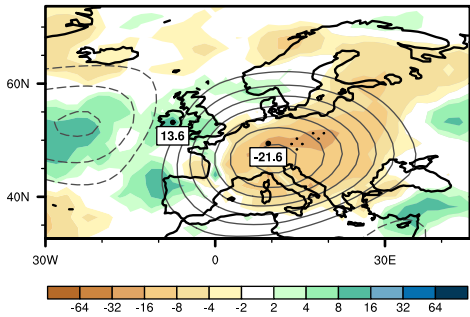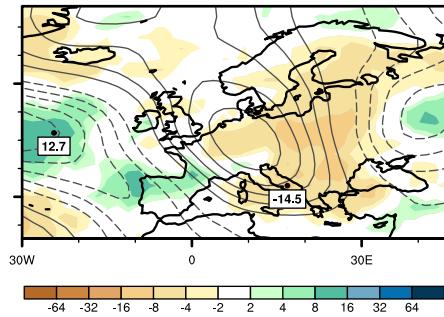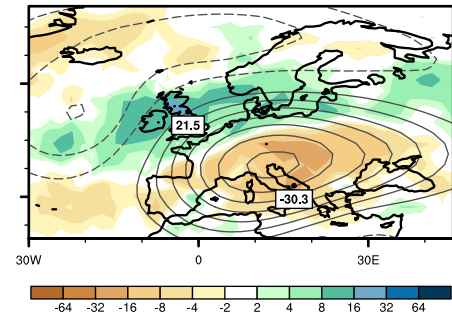

# Spring (MAM) 1491

## ModE-RA

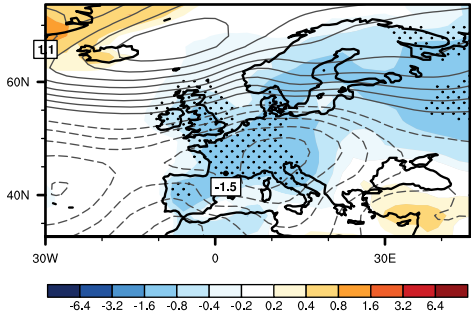

## ModE-Sim

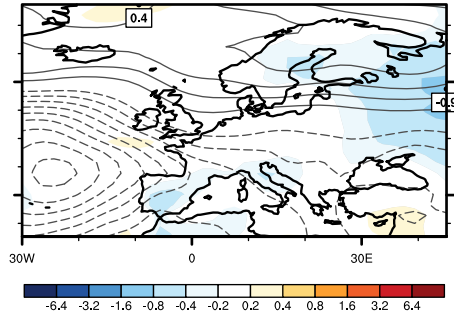

## ModE-RAClim

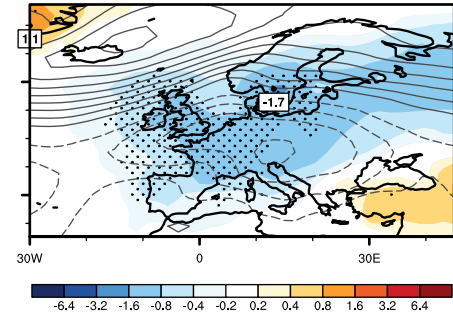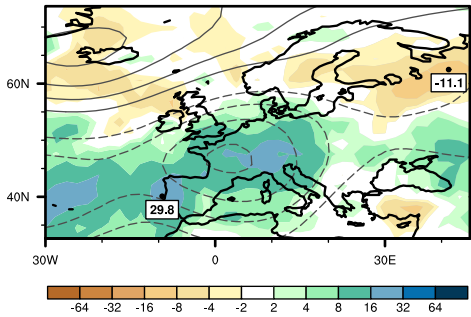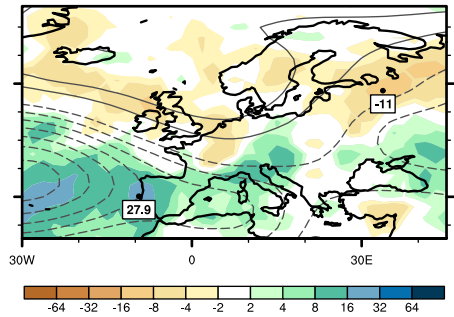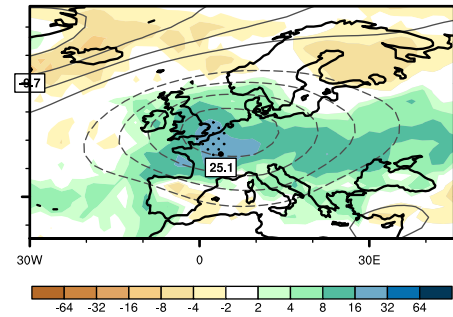

# Spring (MAM) 1542

## ModE-RA

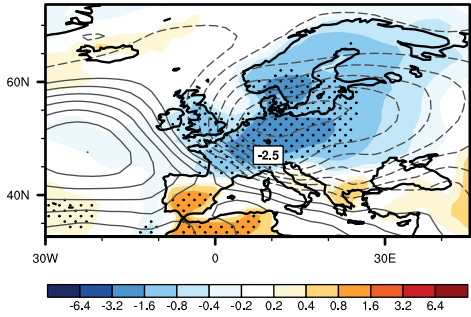

## ModE-Sim

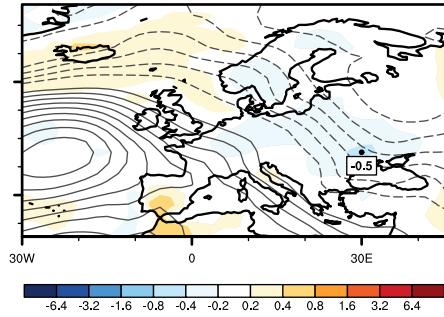

## ModE-RAClim

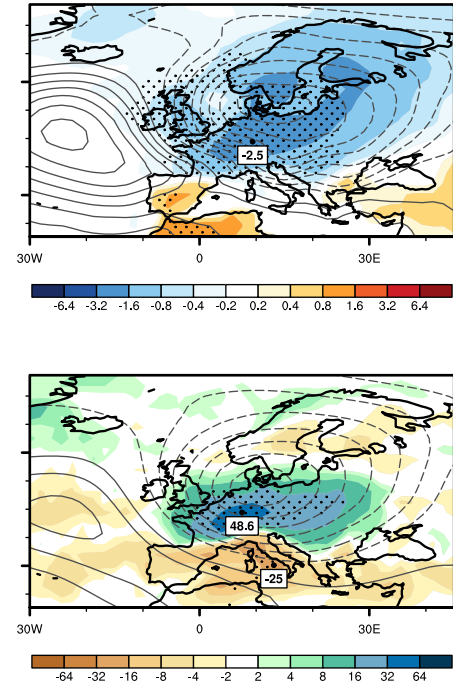

# Spring (MAM) 1556

## ModE-RA

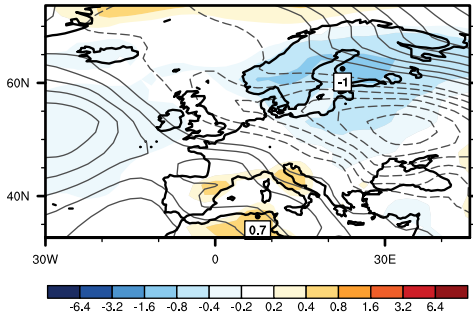

## ModE-Sim

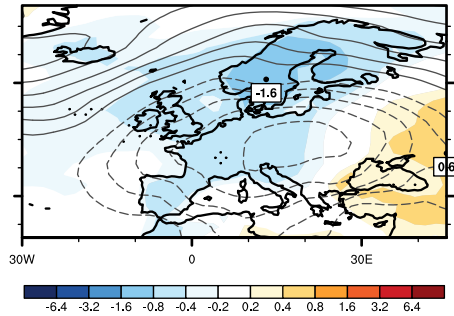

## ModE-RAClim

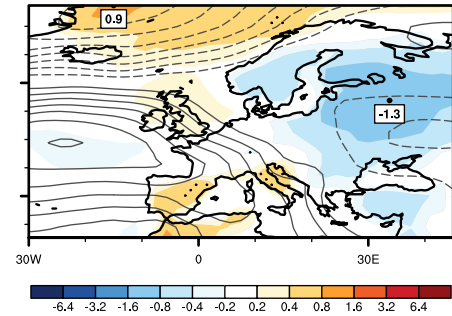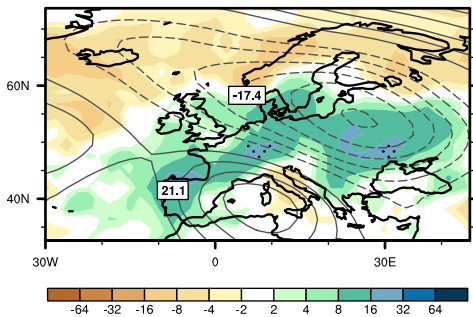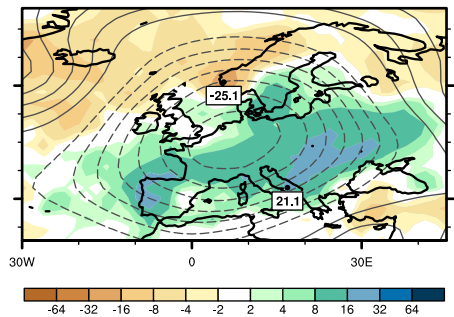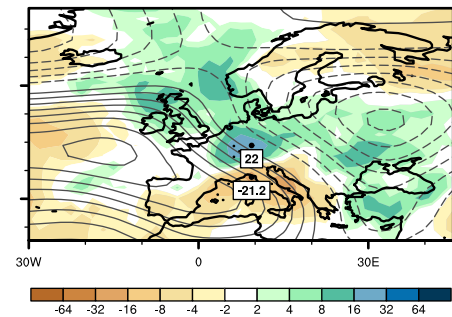

# Spring (MAM) 1573

## ModE-RA

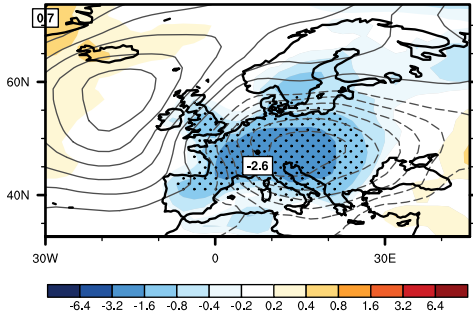

## ModE-Sim

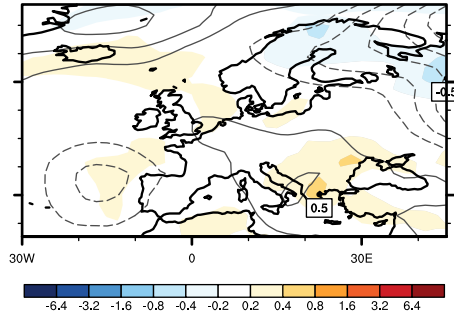

## ModE-RAClim

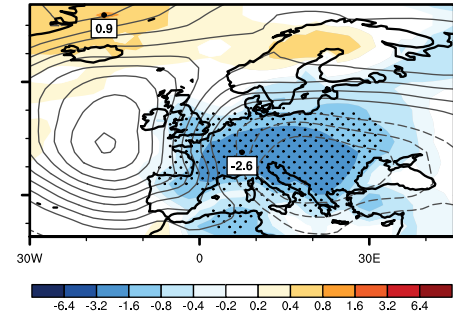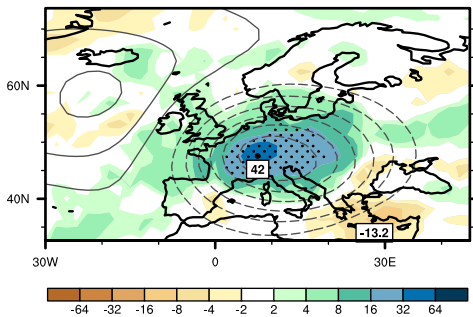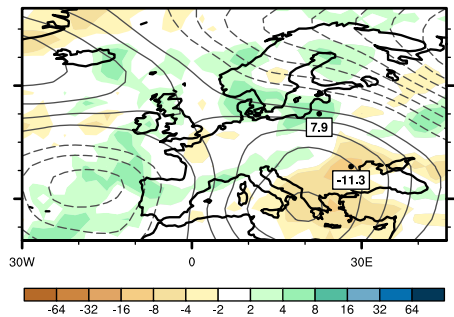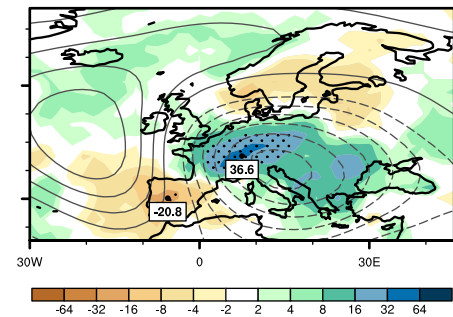

# Spring (MAM) 1587

## ModE-RA

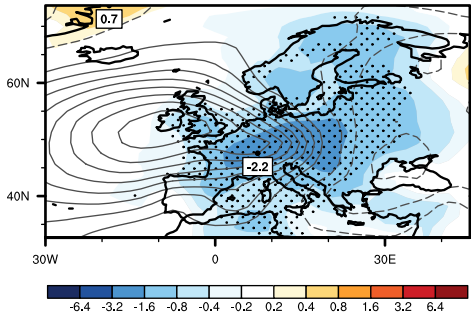

## ModE-Sim

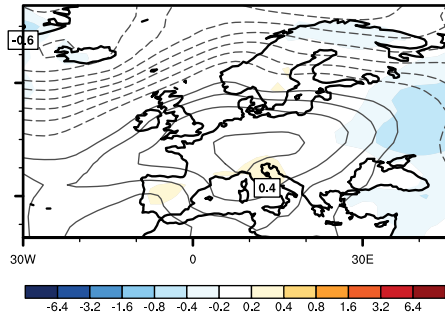

## ModE-RAClim

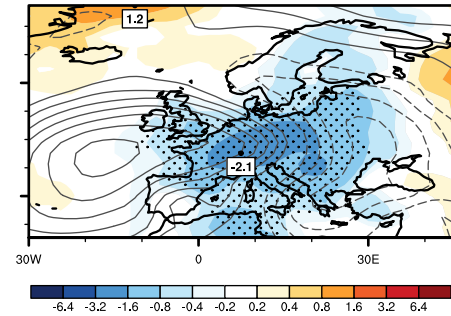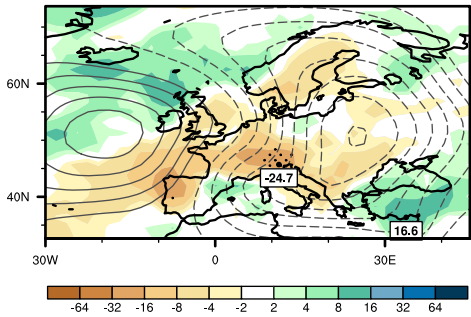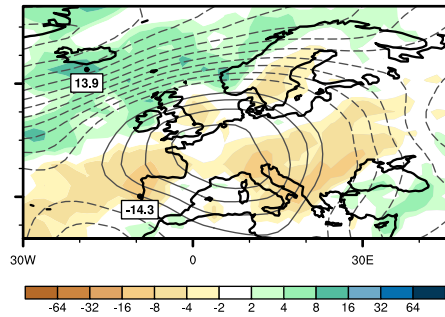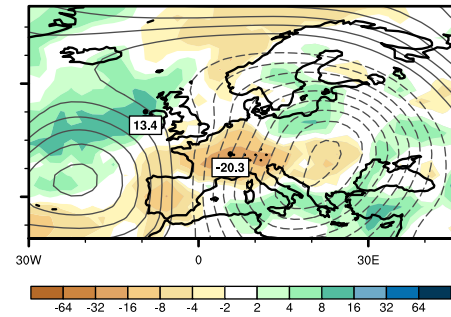

# Spring (MAM) 1611

## ModE-RA

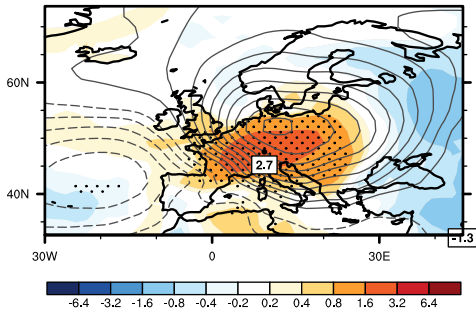

## ModE-Sim

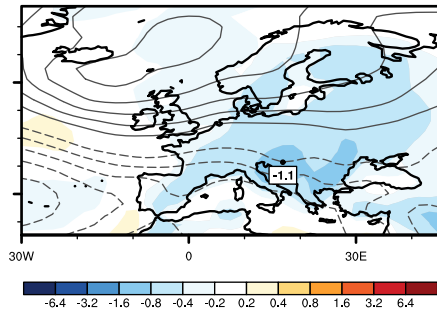

## ModE-RAClim

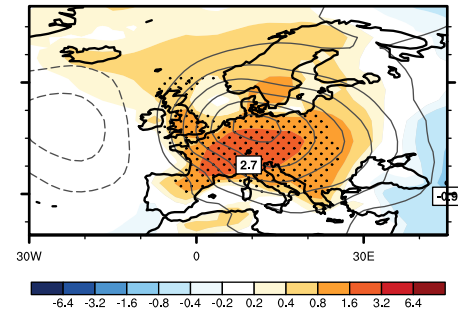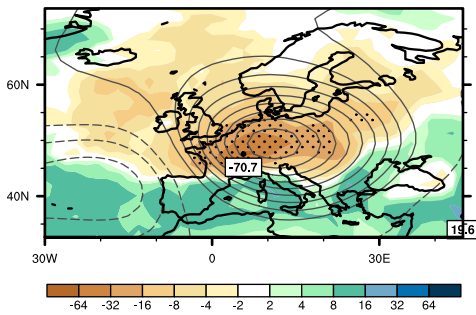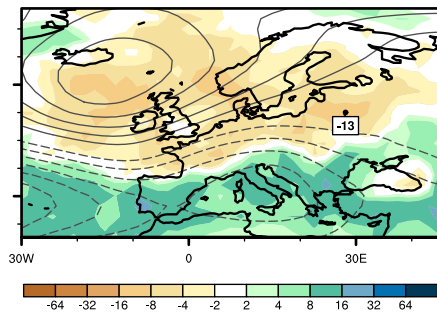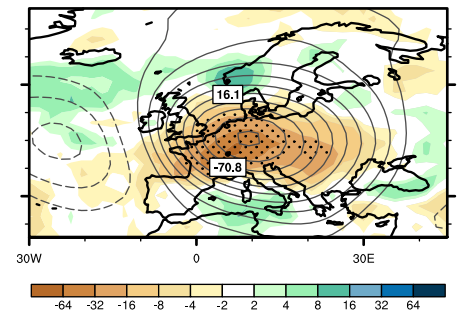

# Spring (MAM) 1614

## ModE-RA

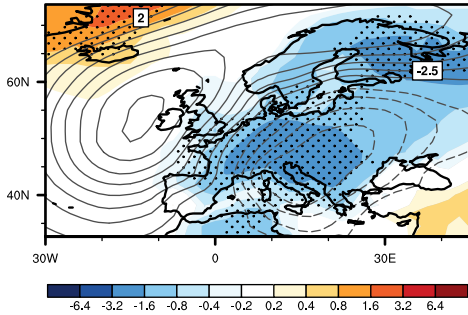

## ModE-Sim

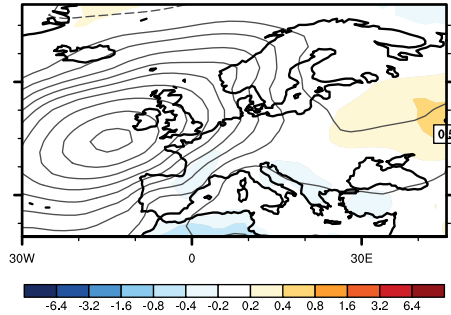

## ModE-RAClim

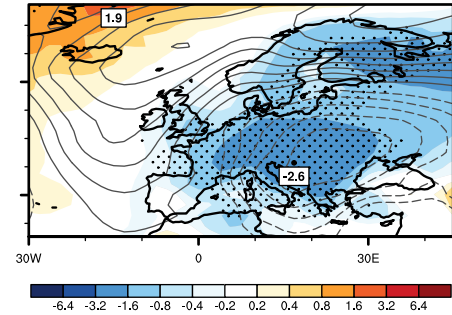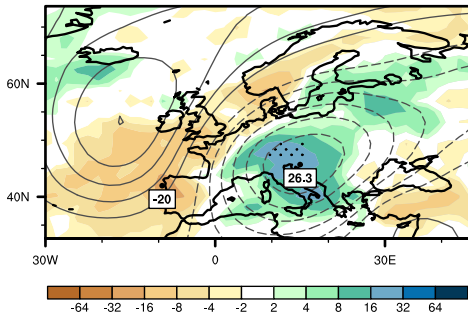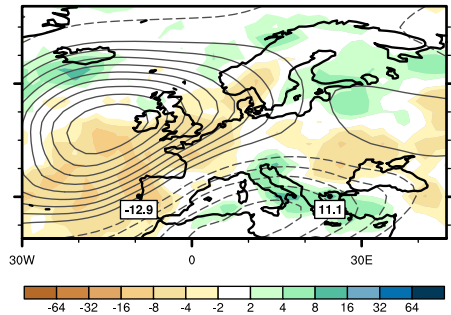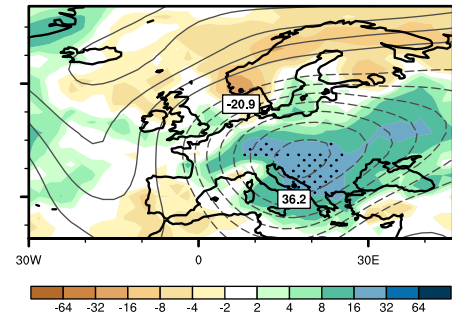

# Spring (MAM) 1627

## ModE-RA

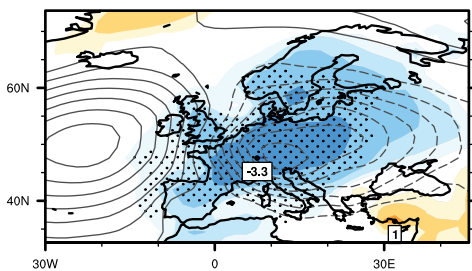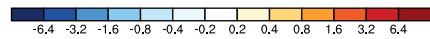

## ModE-Sim

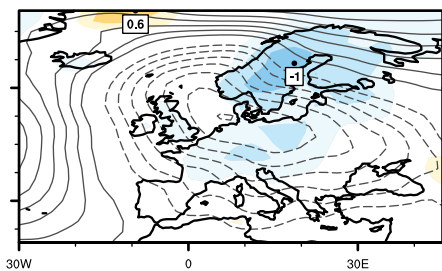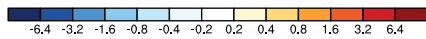

## ModE-RAClim

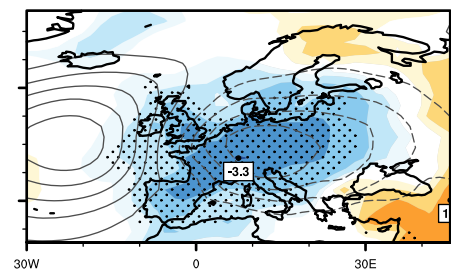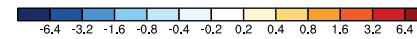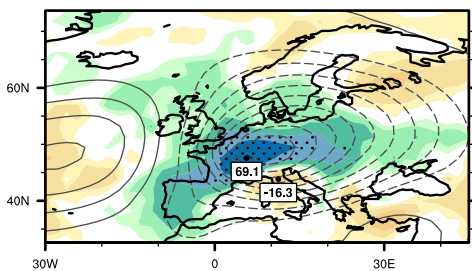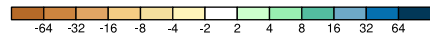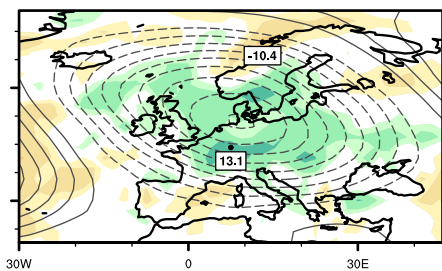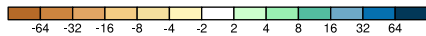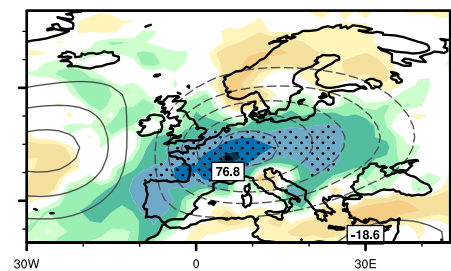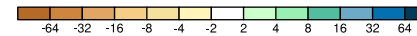

# Spring (MAM) 1658

## ModE-RA

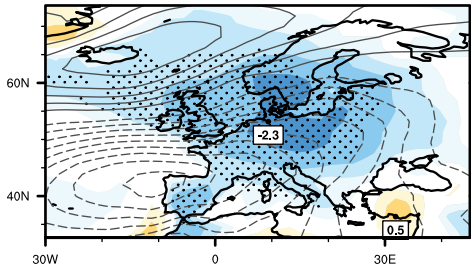

## ModE-Sim

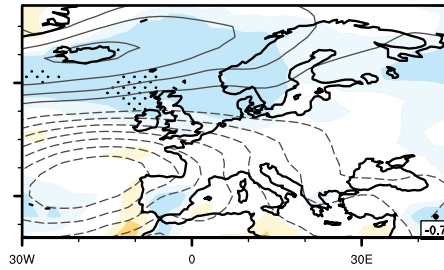

## ModE-RAClim

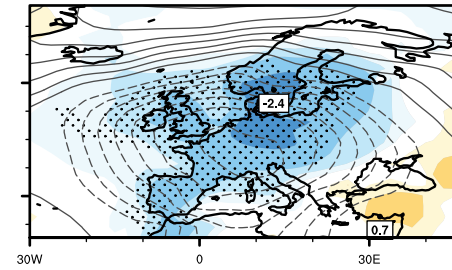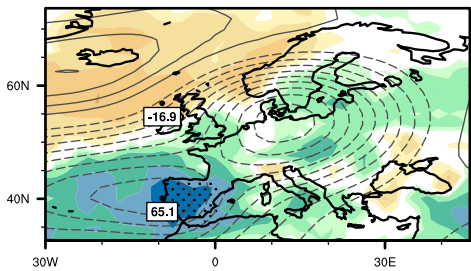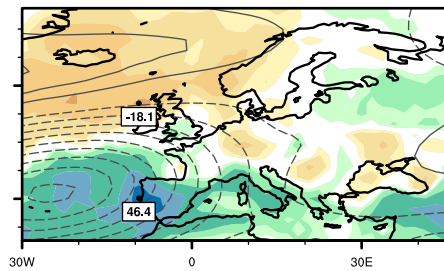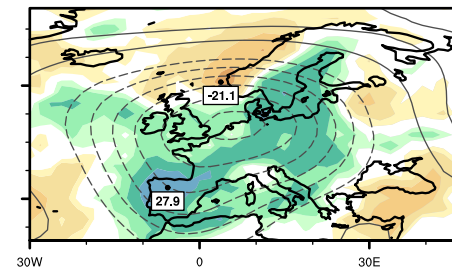

# Spring (MAM) 1686

### ModE-RA

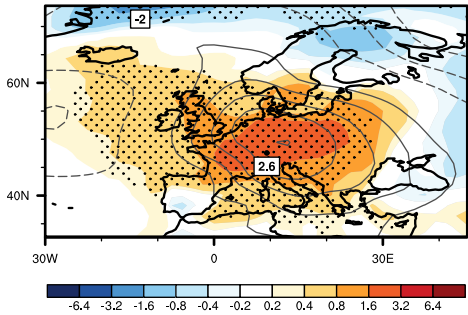

### ModE-Sim

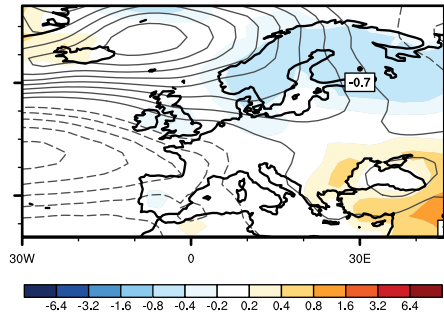

### ModE-RAClim

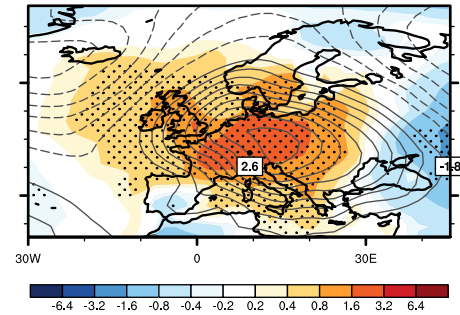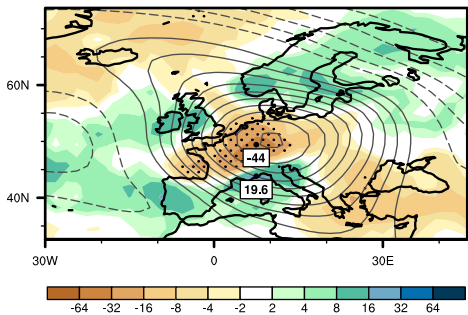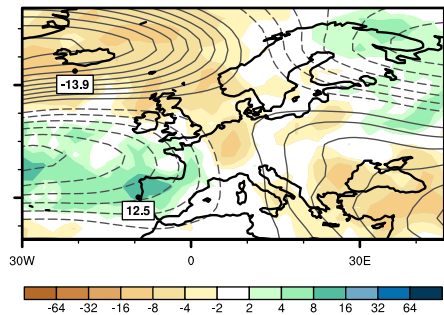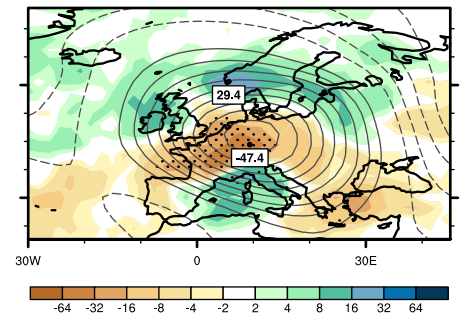

# Spring (MAM) 1740

## ModE-RA

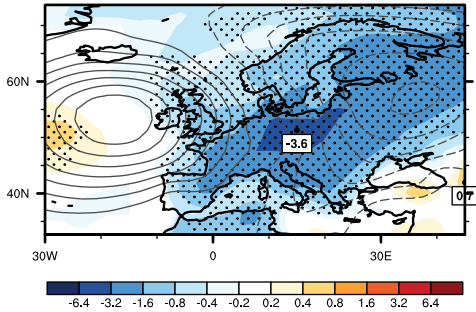

## ModE-Sim

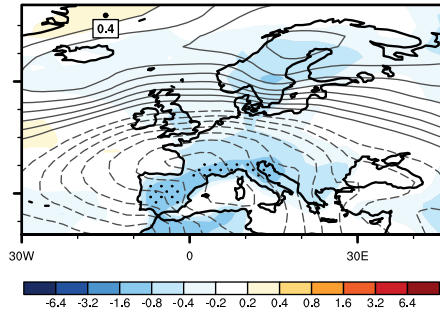

## ModE-RAClim

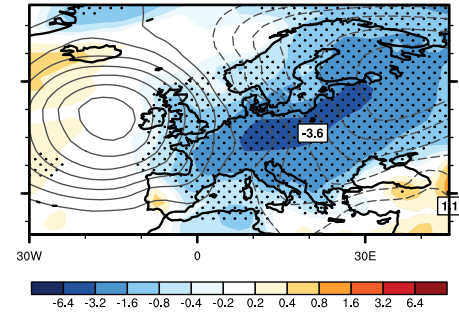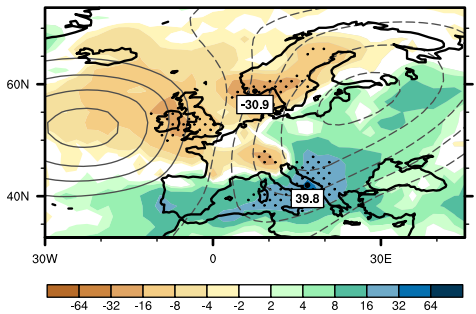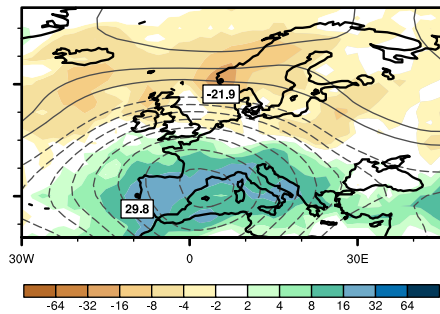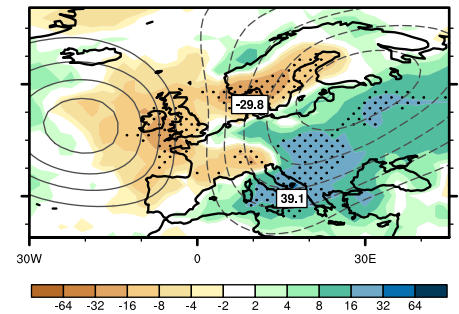

# Spring (MAM) 1785

## ModE-RA

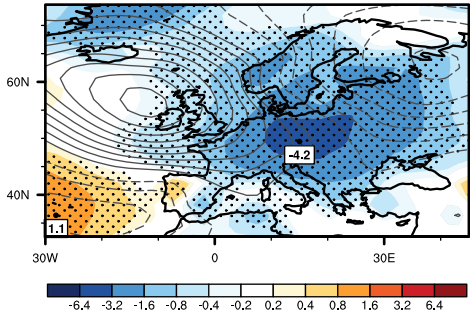

## ModE-Sim

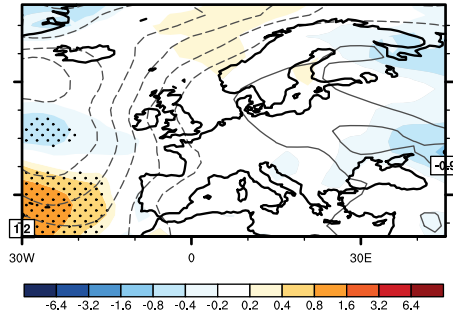

## ModE-RAClim

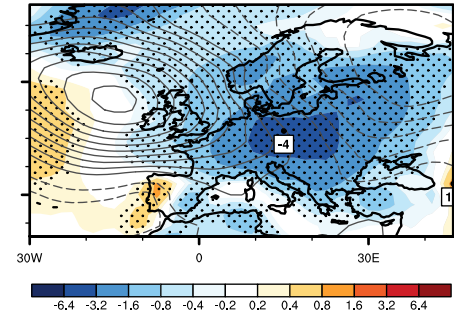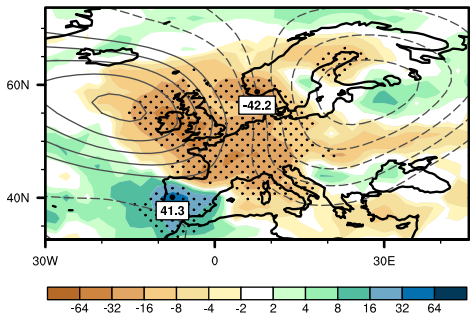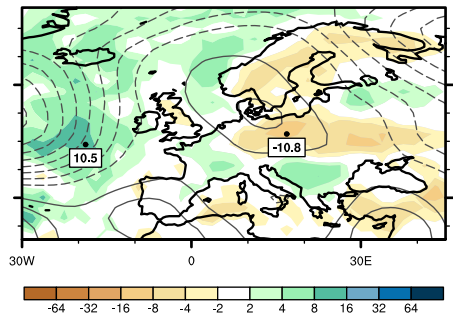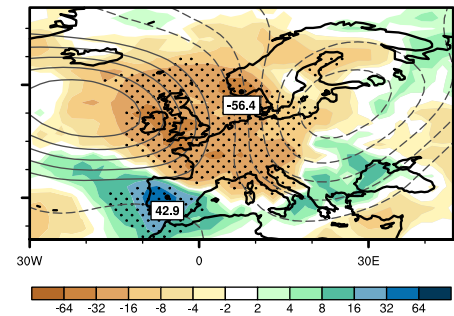

# Spring (MAM) 1794

## ModE-RA

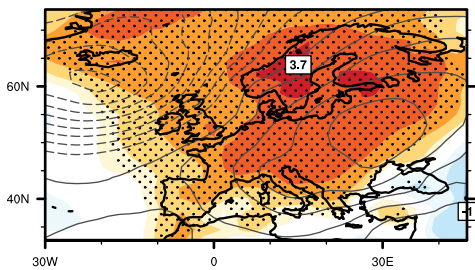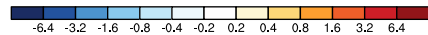

## ModE-Sim

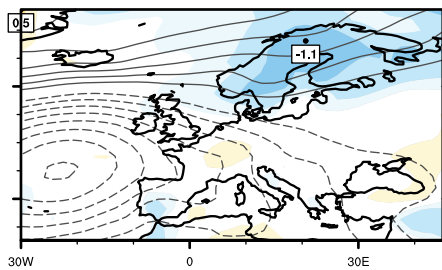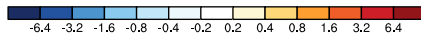

## ModE-RAClim

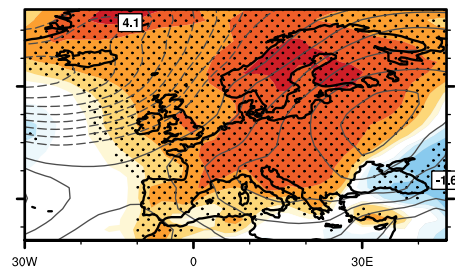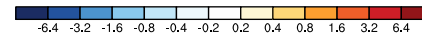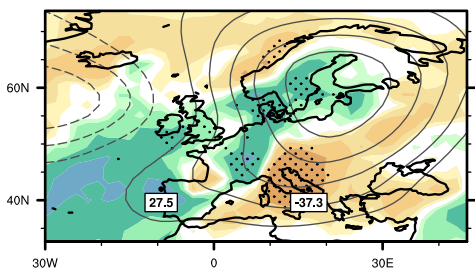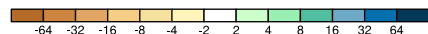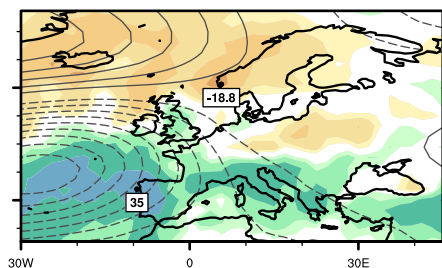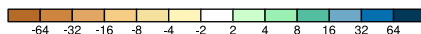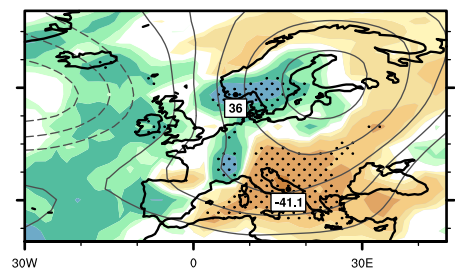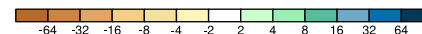

# Spring (MAM) 1811

## ModE-RA

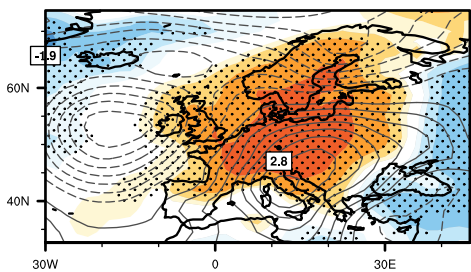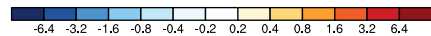

## ModE-Sim

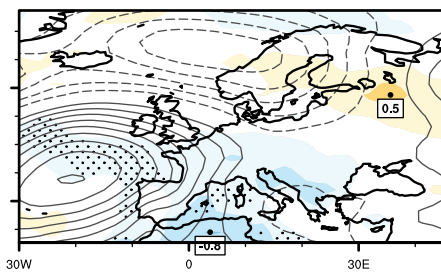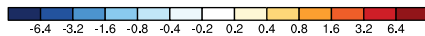

## ModE-RAClim

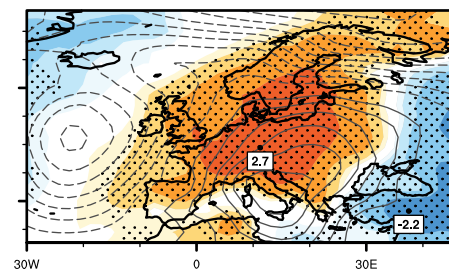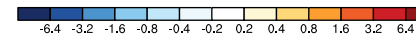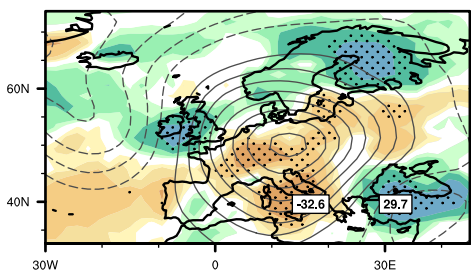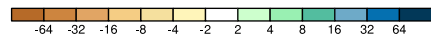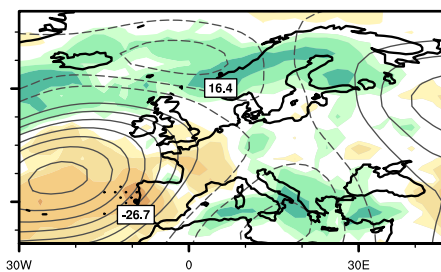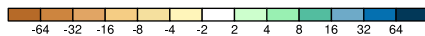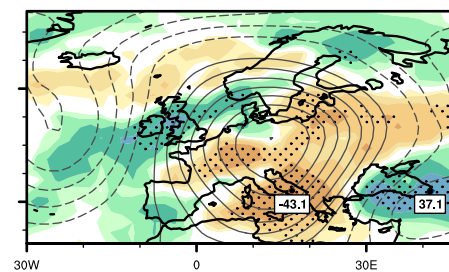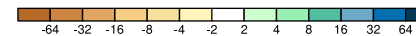

# Spring (MAM) 1822

## ModE-RA

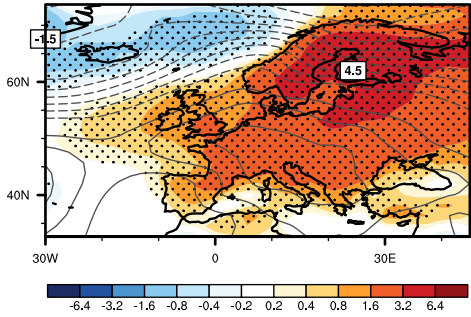

## ModE-Sim

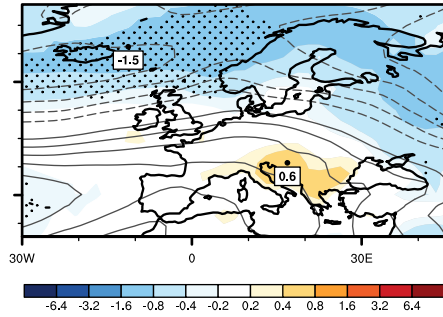

## ModE-RAClim

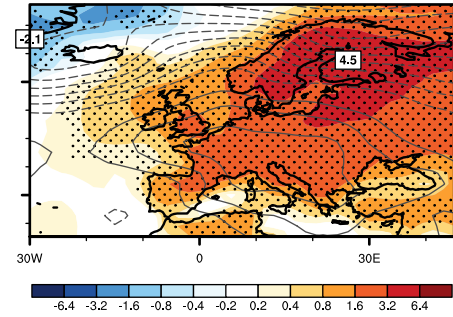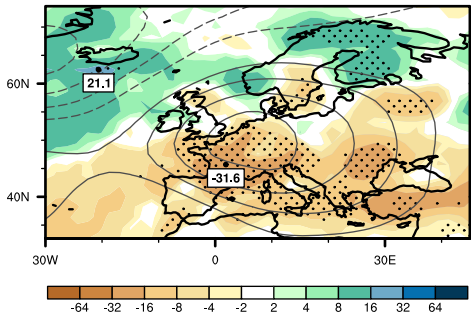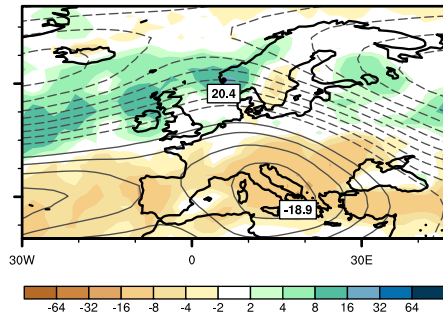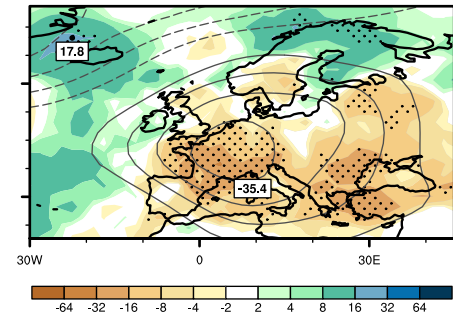

# Spring (MAM) 1837

## ModE-RA

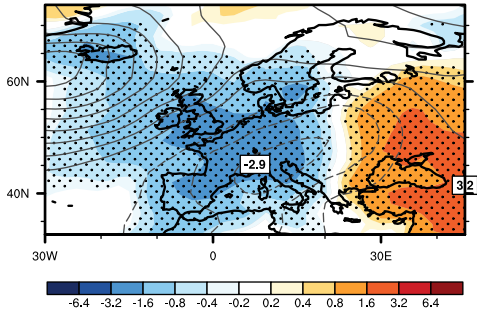

## ModE-Sim

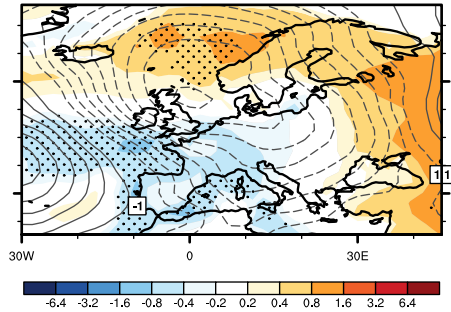

## ModE-RAClim

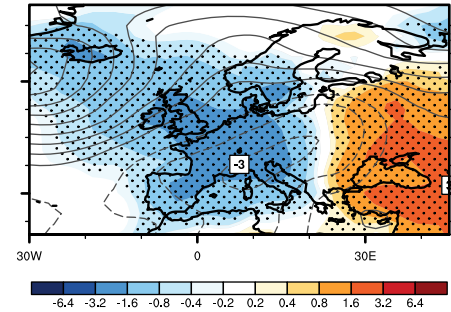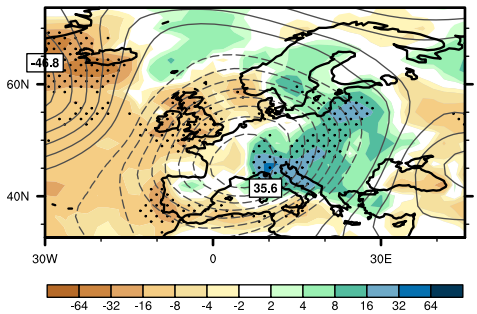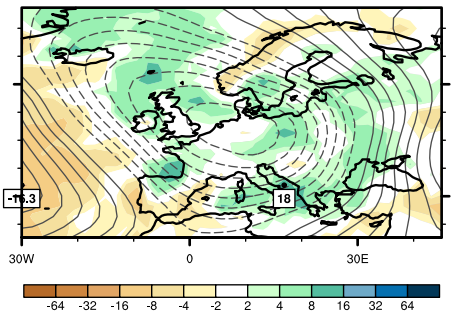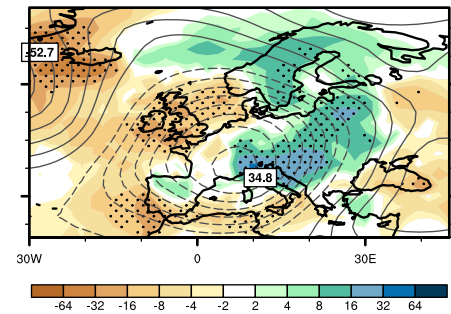

# Spring (MAM) 1853

### ModE-RA

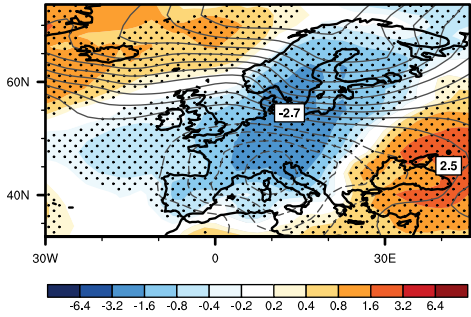

### ModE-Sim

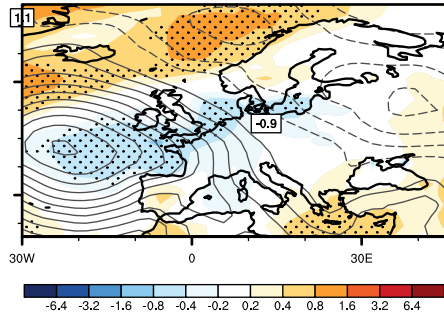

### ModE-RAClim

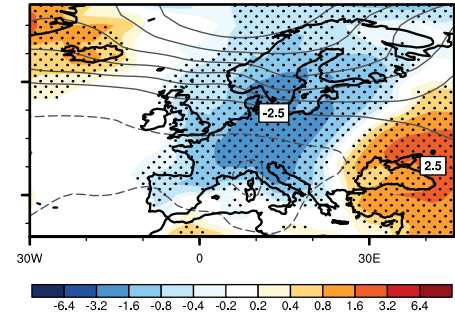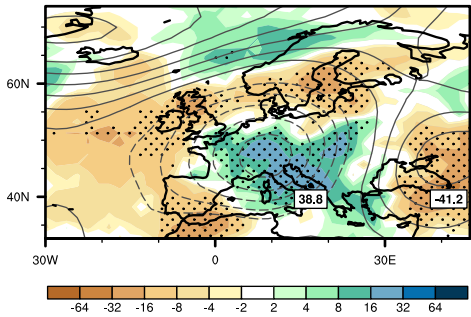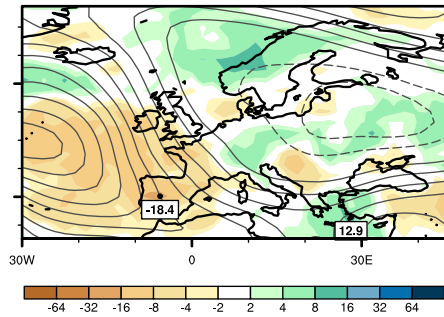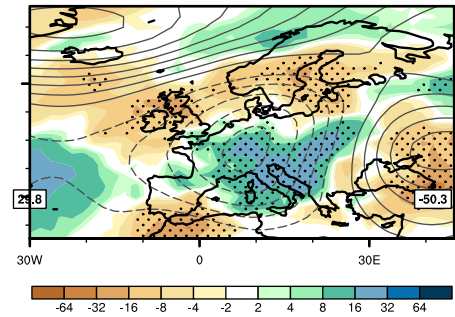

# Spring (MAM) 1917

## ModE-RA

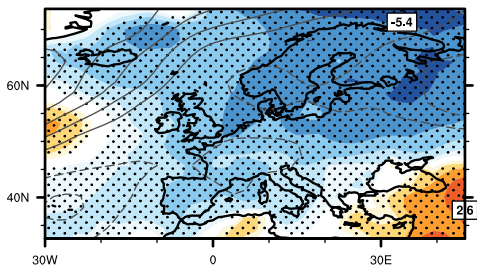

## ModE-Sim

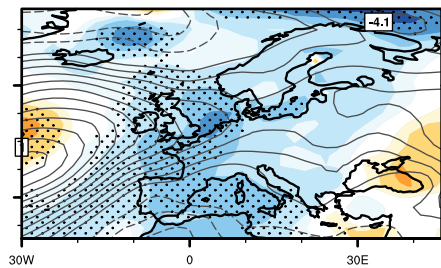

## ModE-RAClim

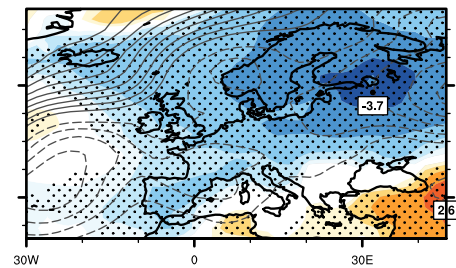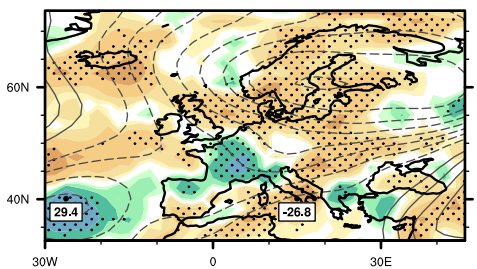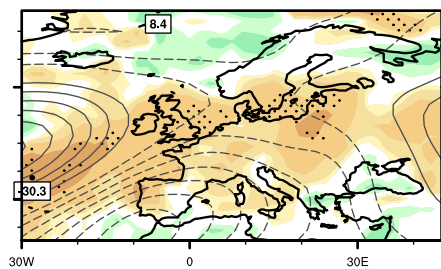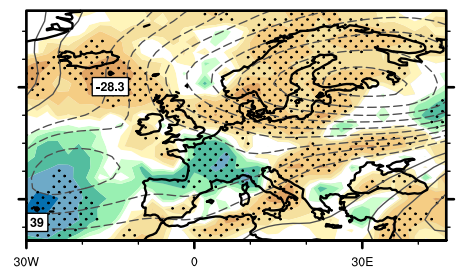

# Spring (MAM) 1945

## ModE-RA

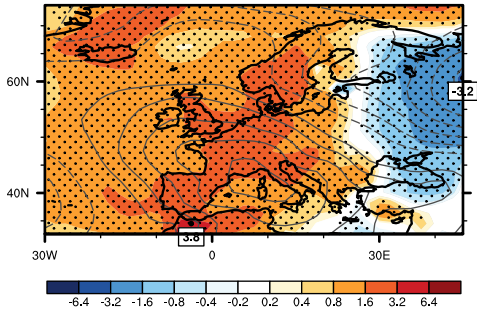

## ModE-Sim

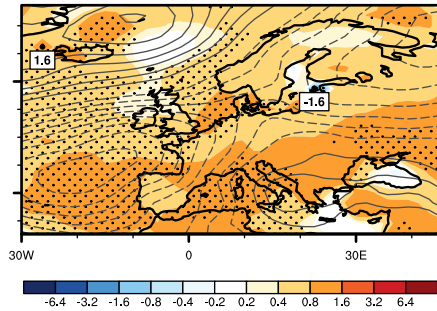

## ModE-RAclim

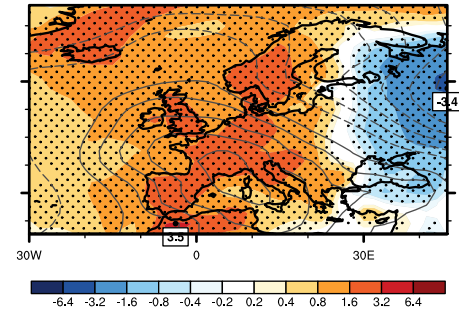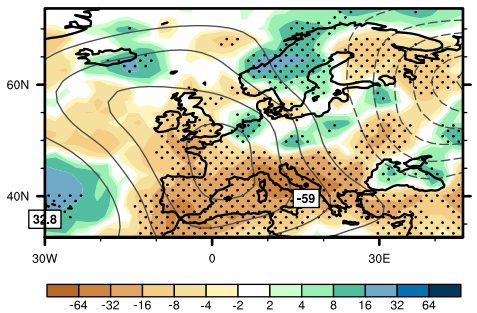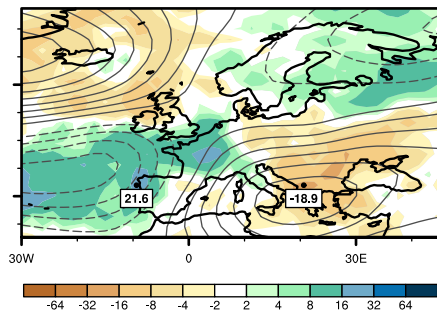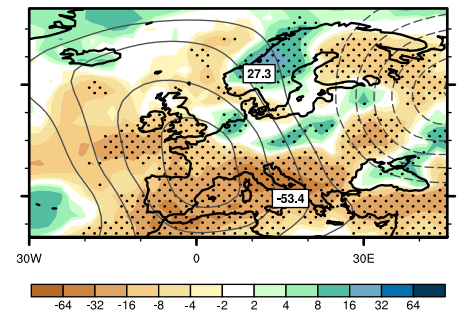

# Summer (JJA) 1471

### ModE-RA

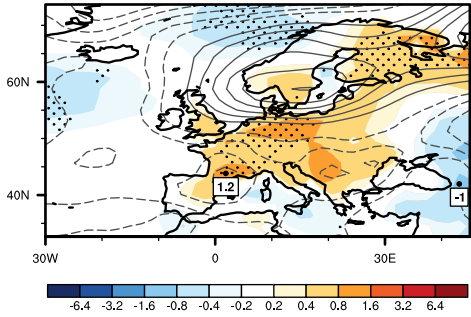

### ModE-Sim

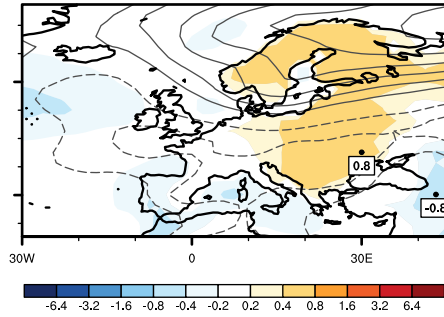

### ModE-RAClim

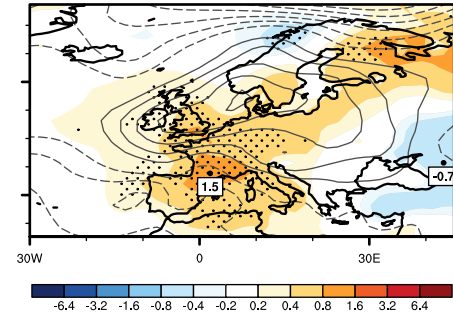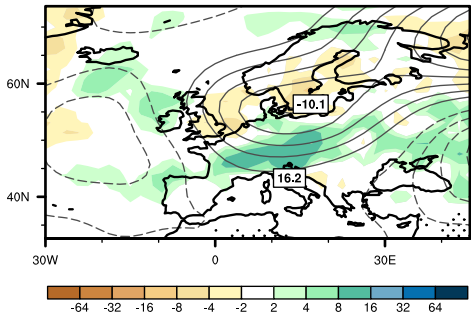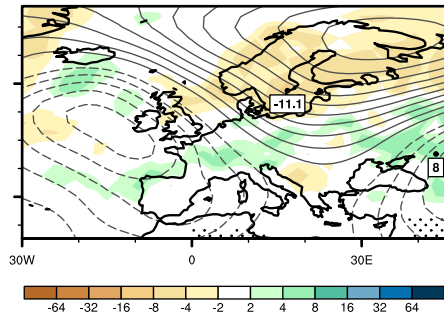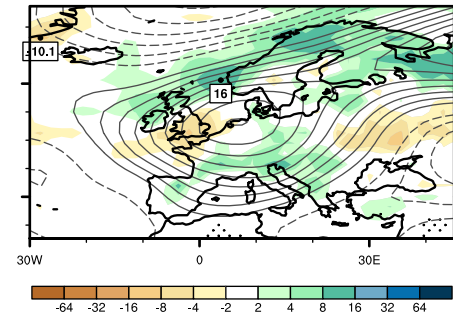

# Summer (JJA) 1473

## ModE-RA

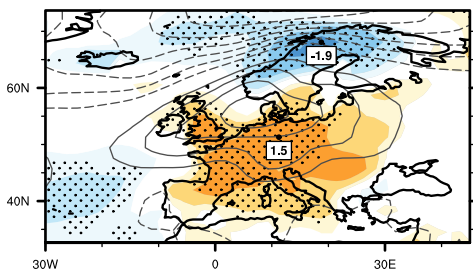

## ModE-Sim

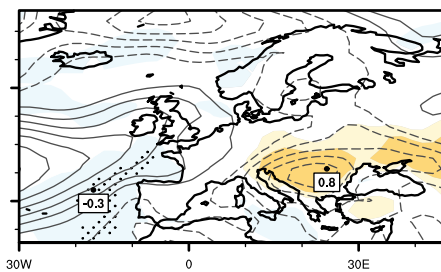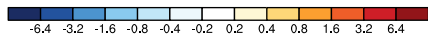

## ModE-RAClim

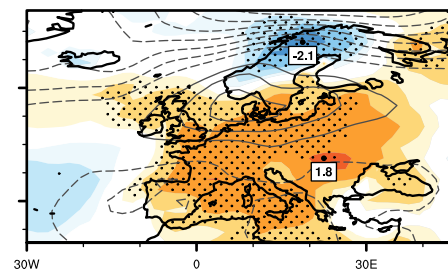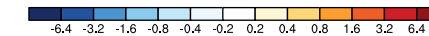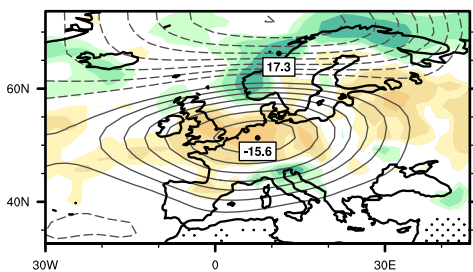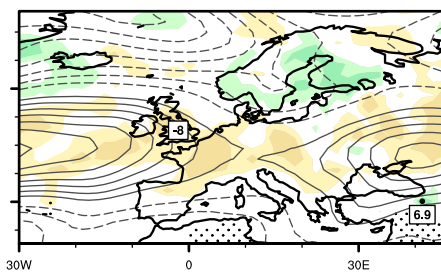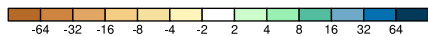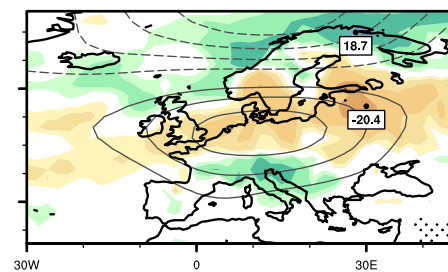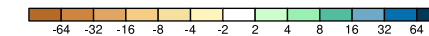

# Summer (JJA) 1480

### ModE-RA

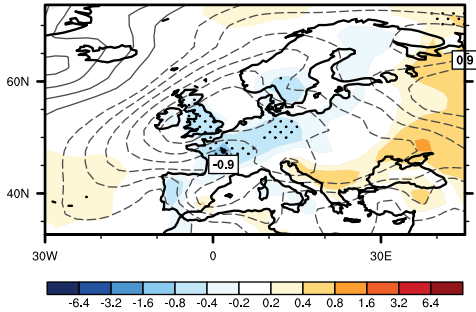

### ModE-Sim

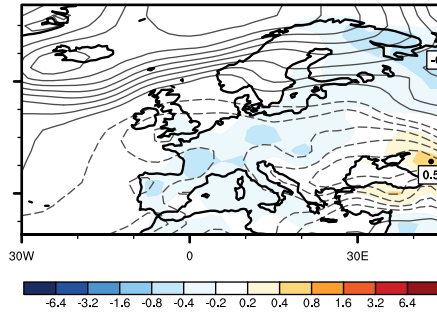

### ModE-RAClim

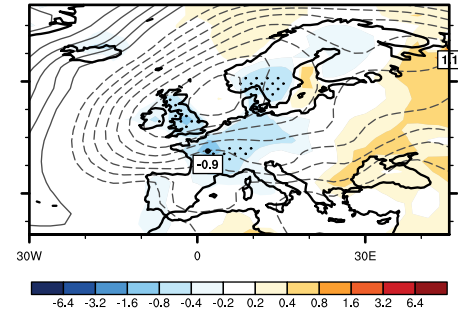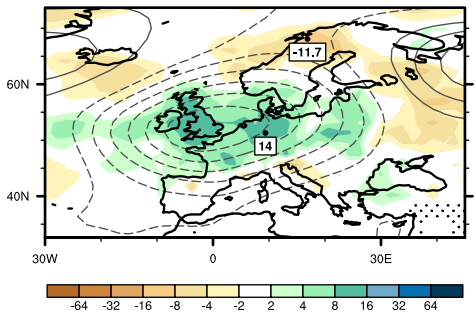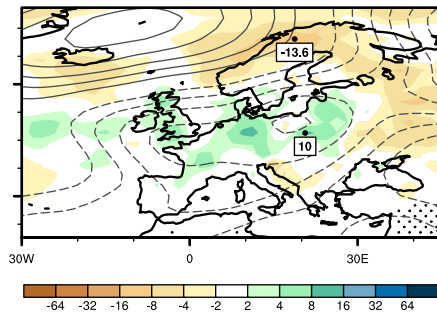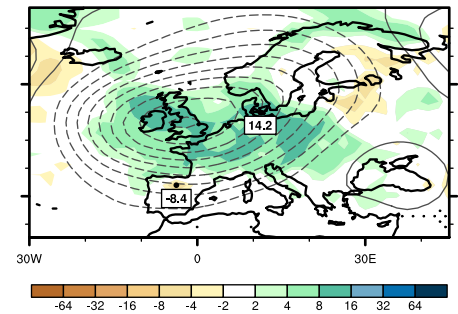

# Summer (JJA) 1491

## ModE-RA

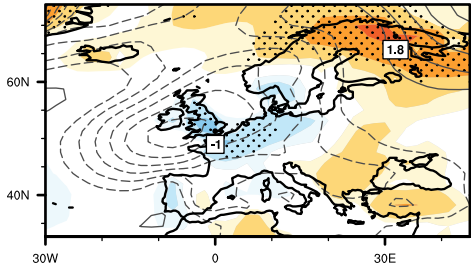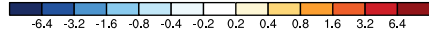

## ModE-Sim

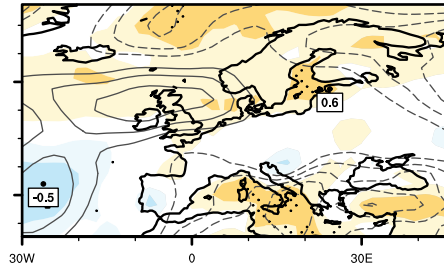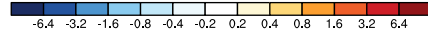

## ModE-RAClim

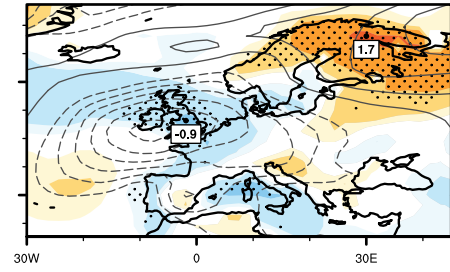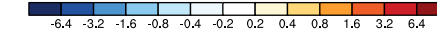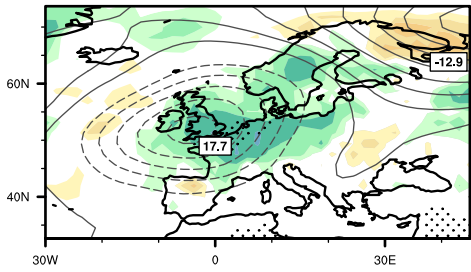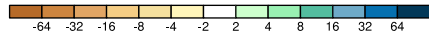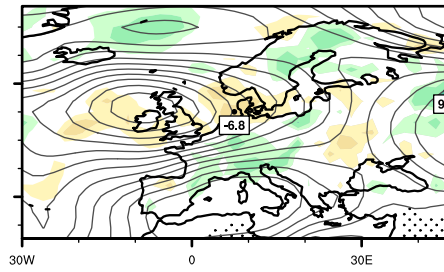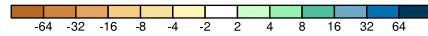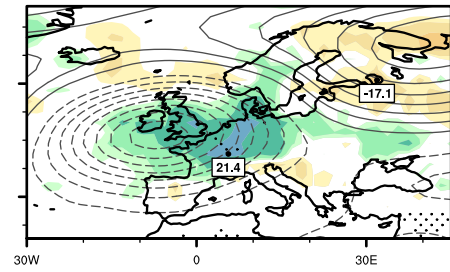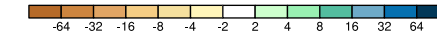

# Summer (JJA) 1536

## ModE-RA

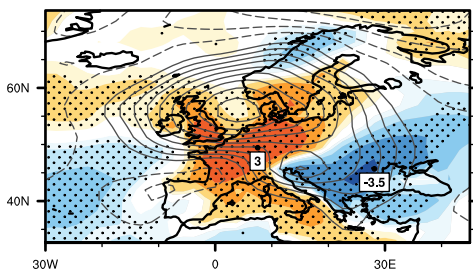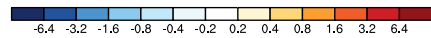

## ModE-Sim

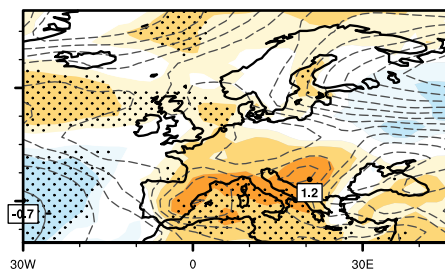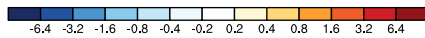

## ModE-RAClim

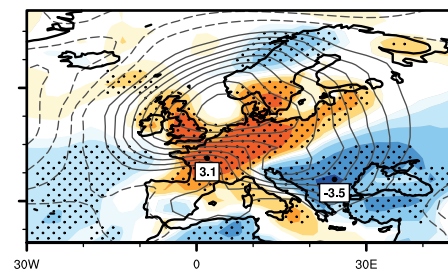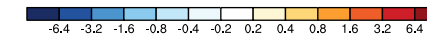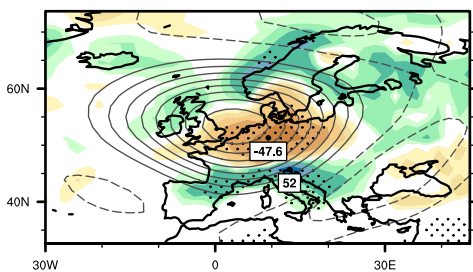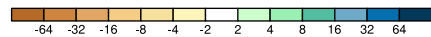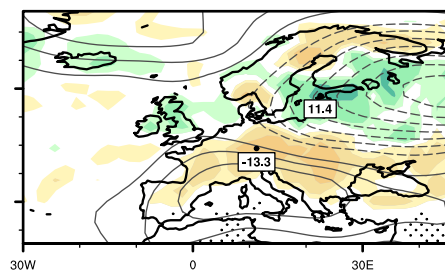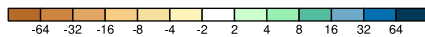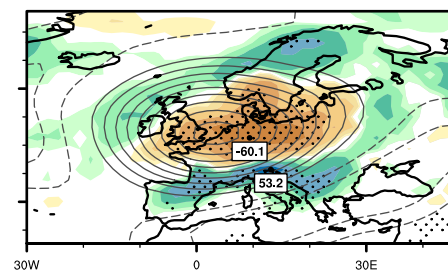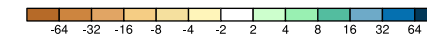

# Summer (JJA) 1540

## ModE-RA

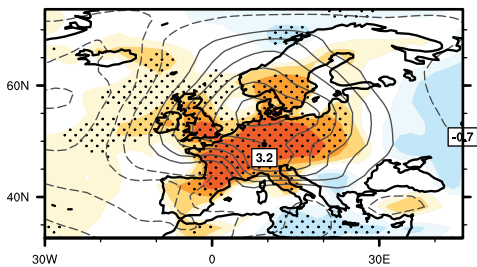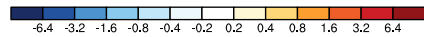

## ModE-Sim

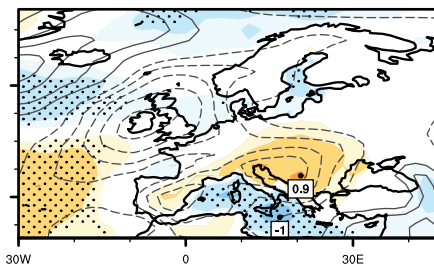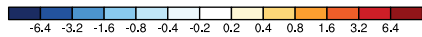

## ModE-RAclim

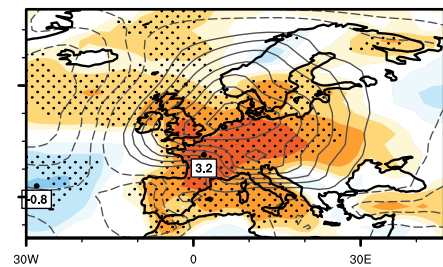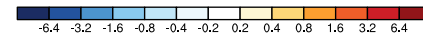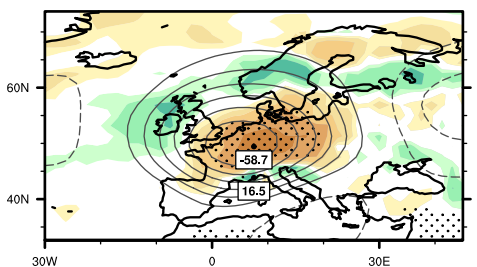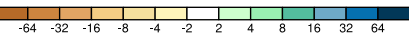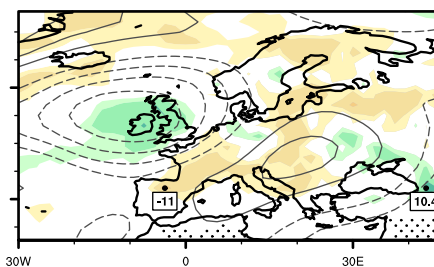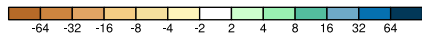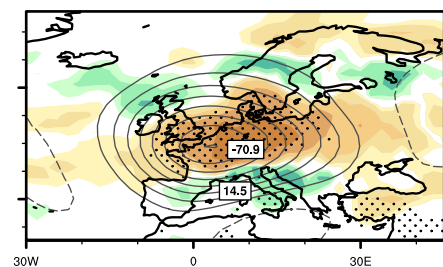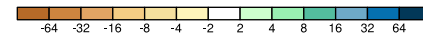

# Summer (JJA) 1542

## ModE-RA

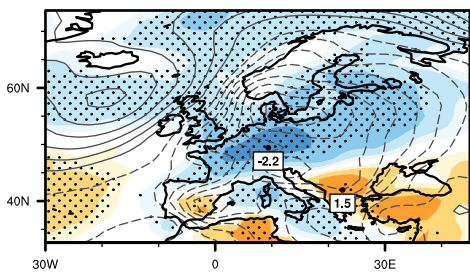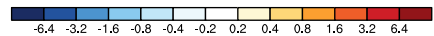

## ModE-Sim

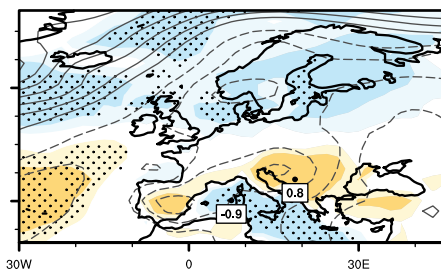

## ModE-RAClim

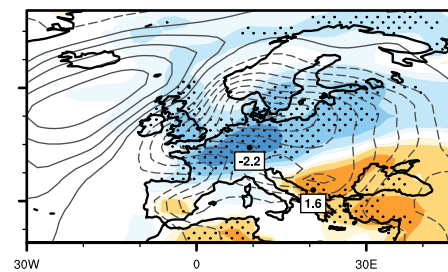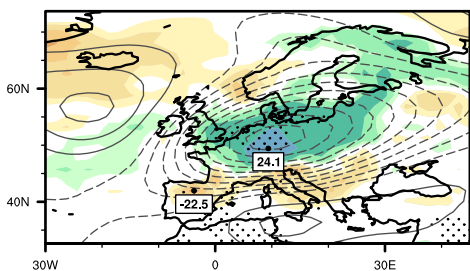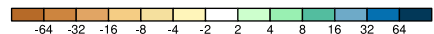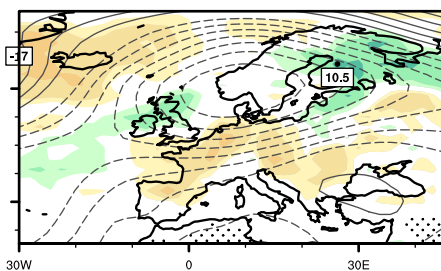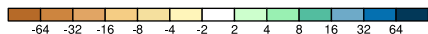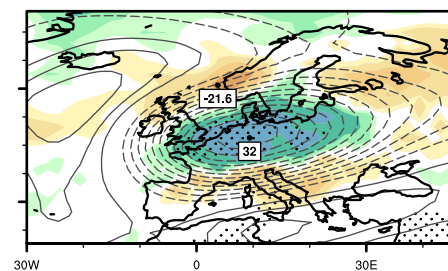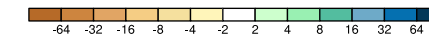

# Summer (JJA) 1545

## ModE-RA

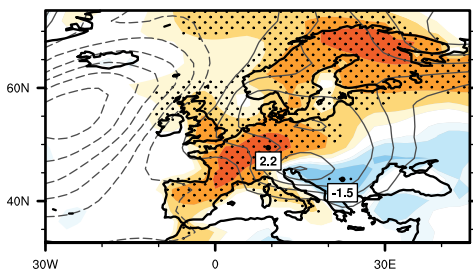

## ModE-Sim

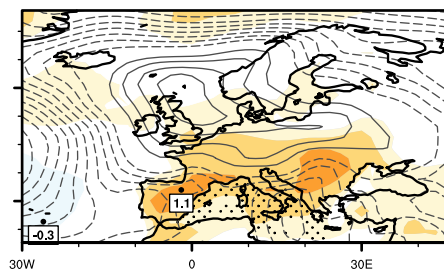

## ModE-RAClim

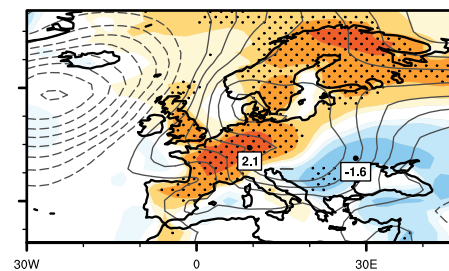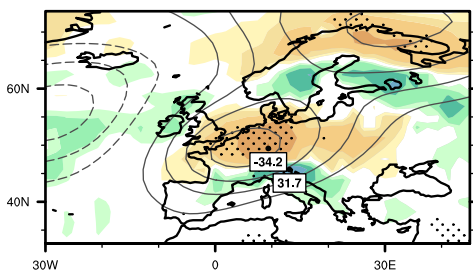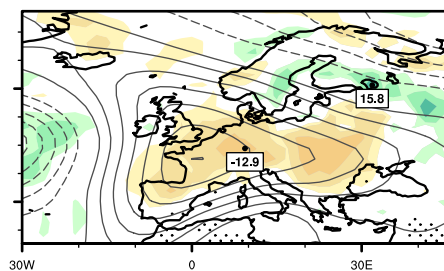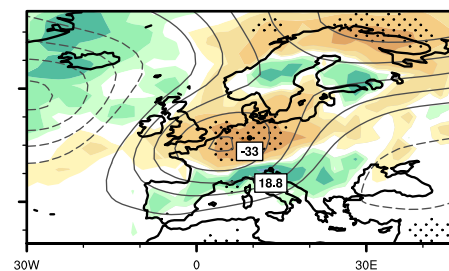

# Summer (JJA) 1556

## ModE-RA

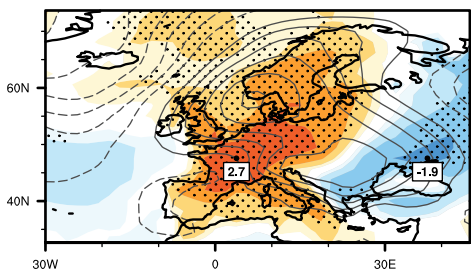

## ModE-Sim

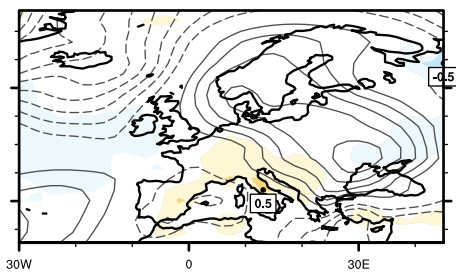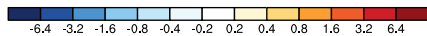

## ModE-RAClim

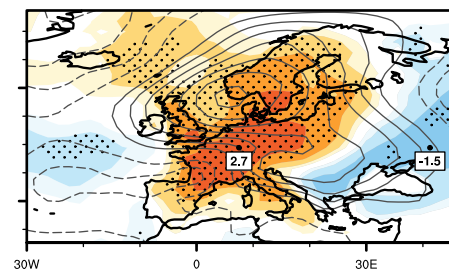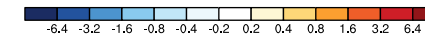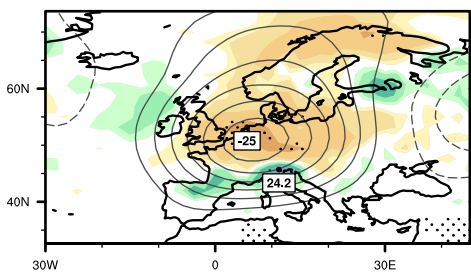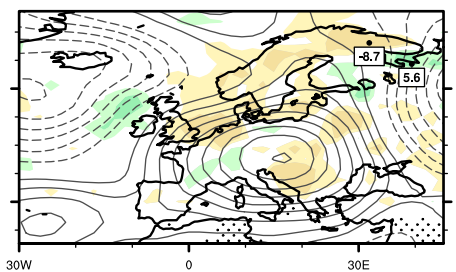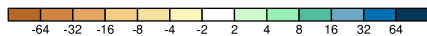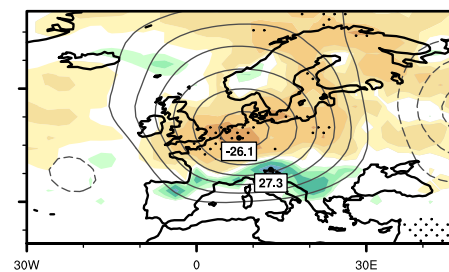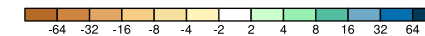

# Summer (JJA) 1579

## ModE-RA

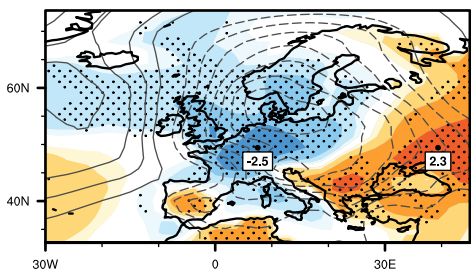

## ModE-Sim

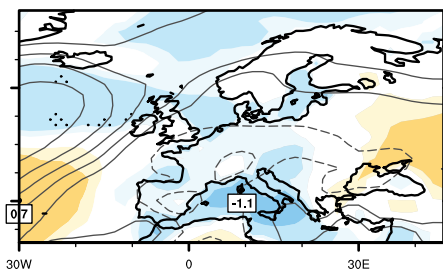

## ModE-RAClim

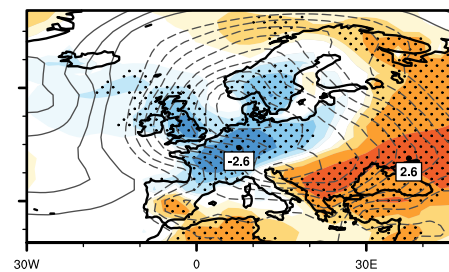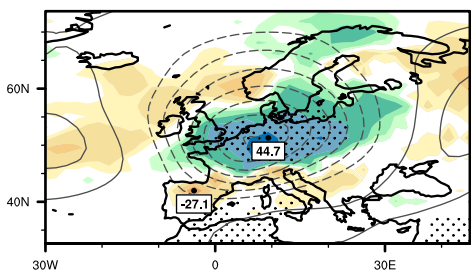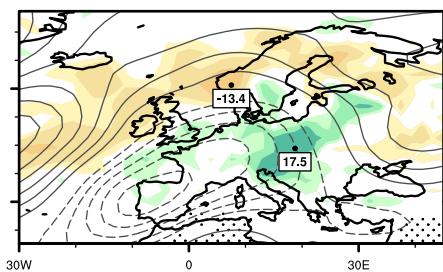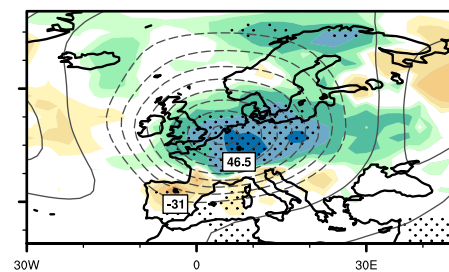

# Summer (JJA) 1587

## ModE-RA

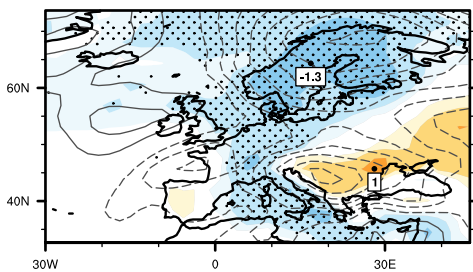

## ModE-Sim

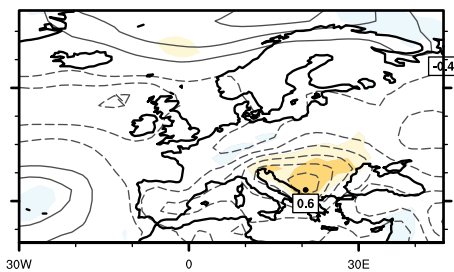

## ModE-RAClim

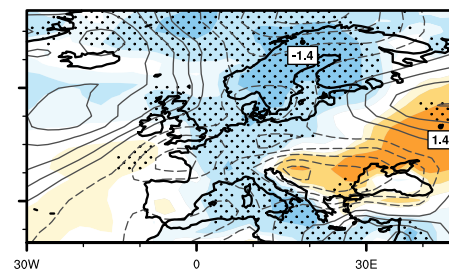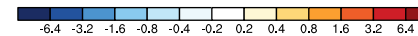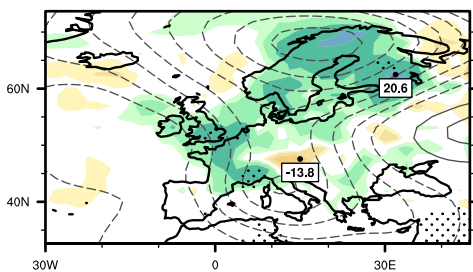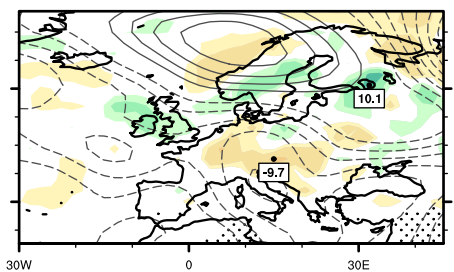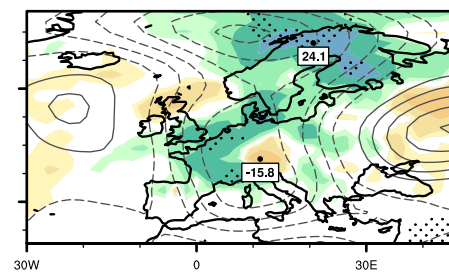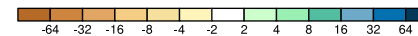

# Summer (JJA) 1588

## ModE-RA

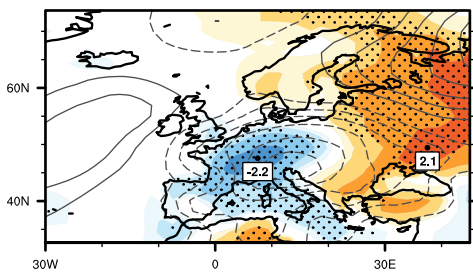

## ModE-Sim

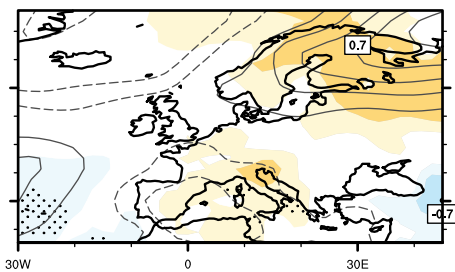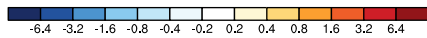

## ModE-RAClim

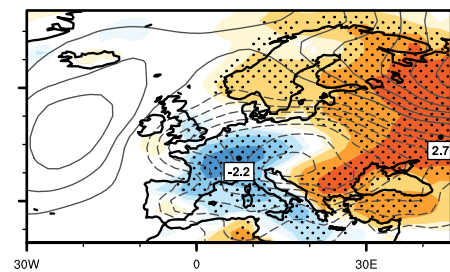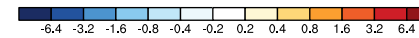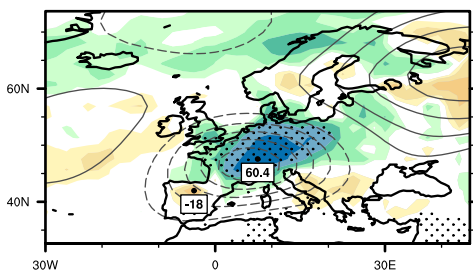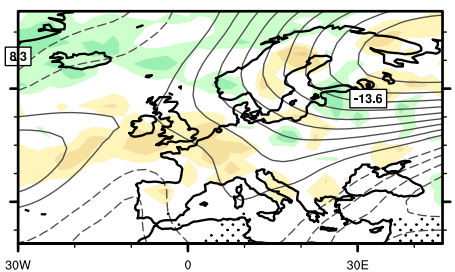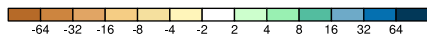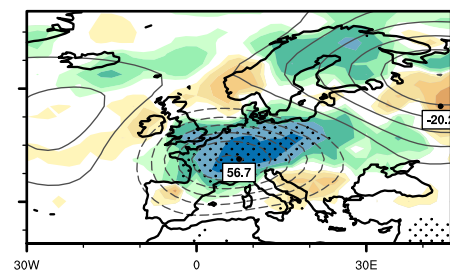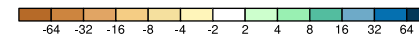

# Summer (JJA) 1590

## ModE-RA

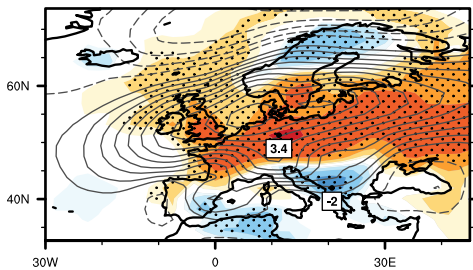

## ModE-Sim

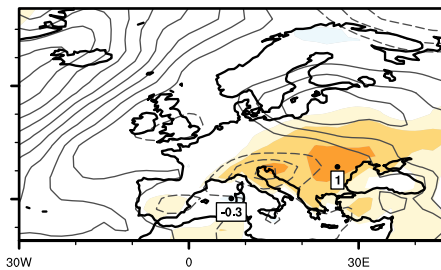

## ModE-RAClim

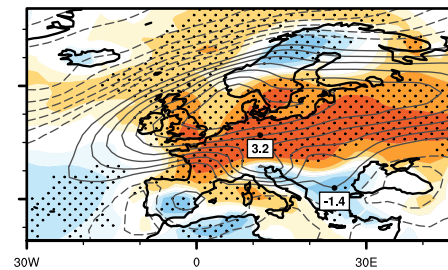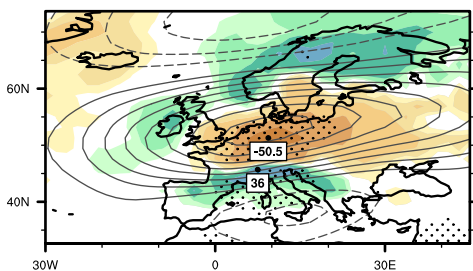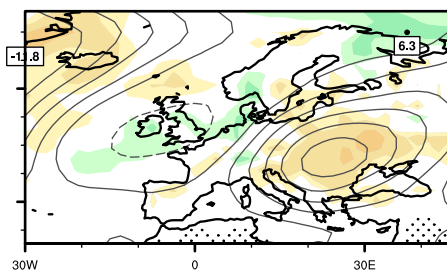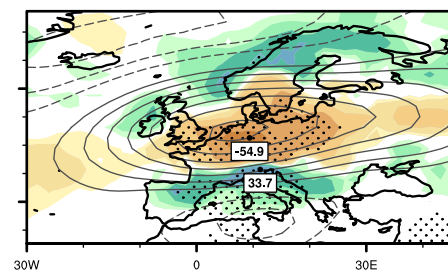

# Summer (JJA) 1596

## ModE-RA

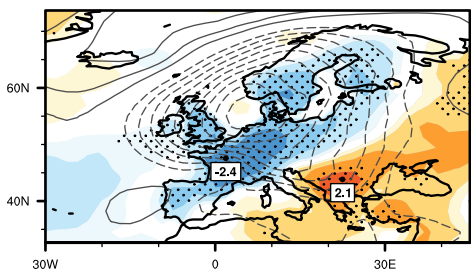

## ModE-Sim

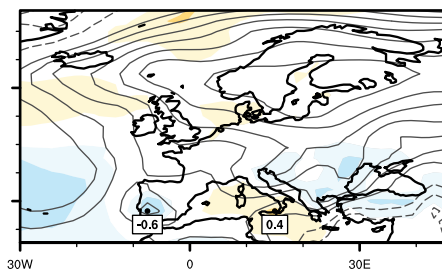

## ModE-RAClim

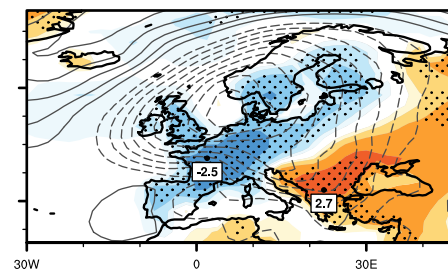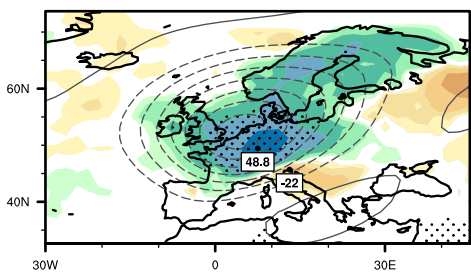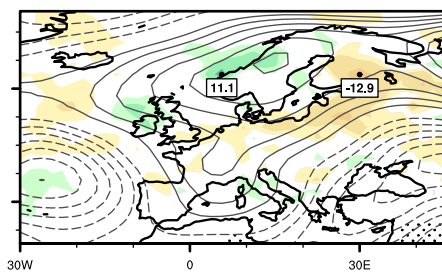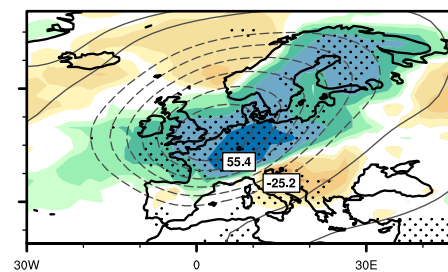

# Summer (JJA) 1616

## ModE-RA

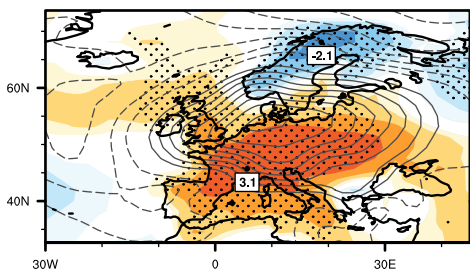

## ModE-Sim

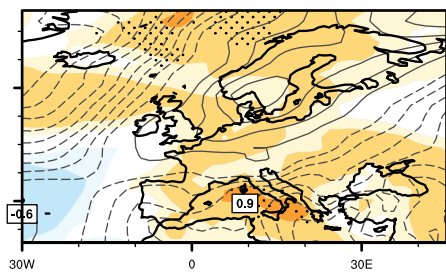

## ModE-RAClim

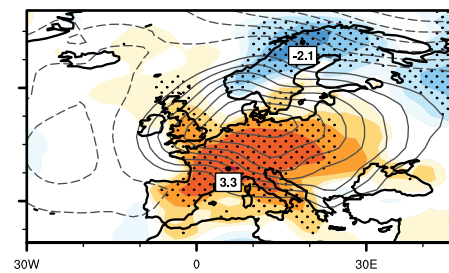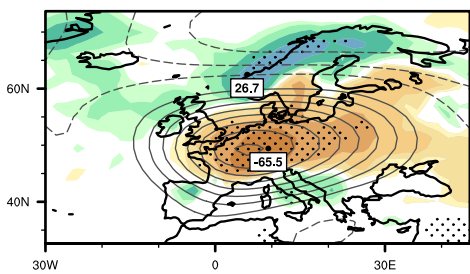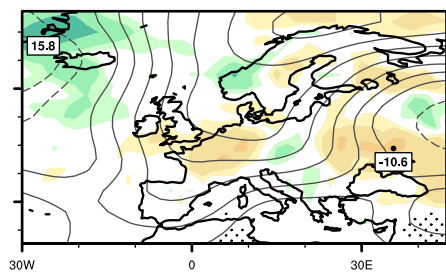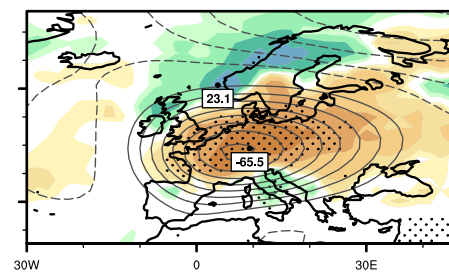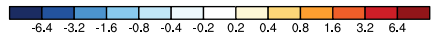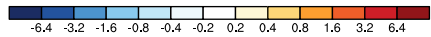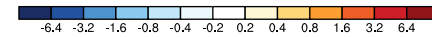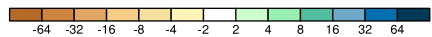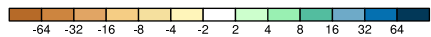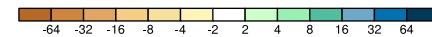

# Summer (JJA) 1621

### ModE-RA

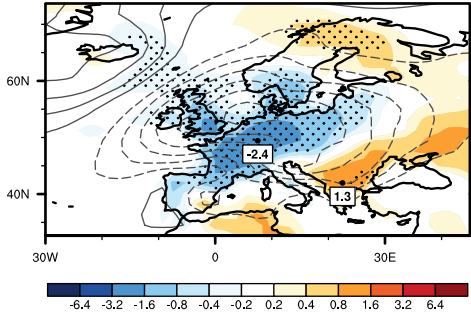

### ModE-Sim

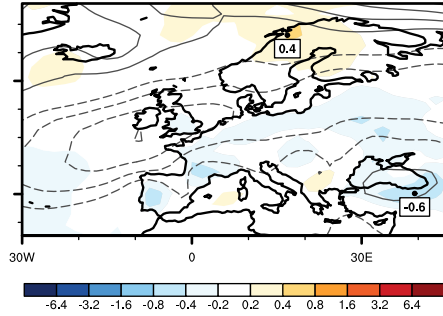

### ModE-RAClim

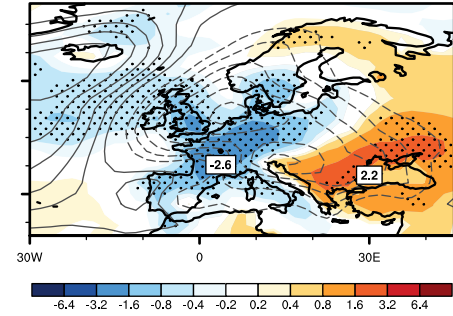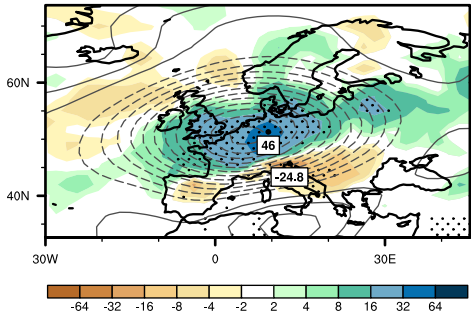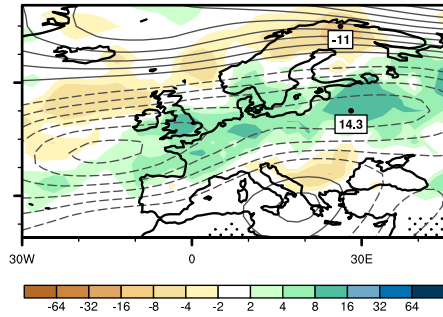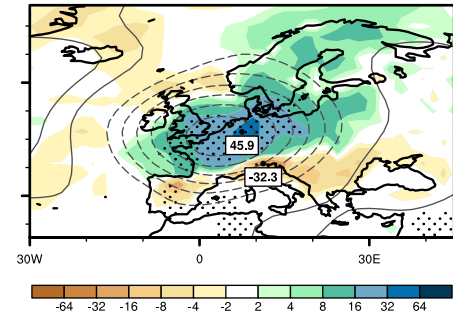

# Summer (JJA) 1628

## ModE-RA

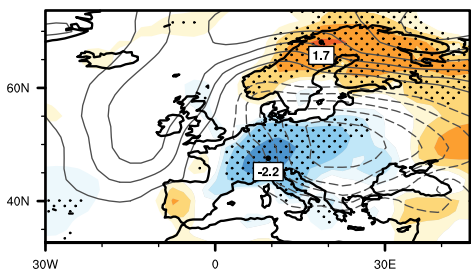

## ModE-Sim

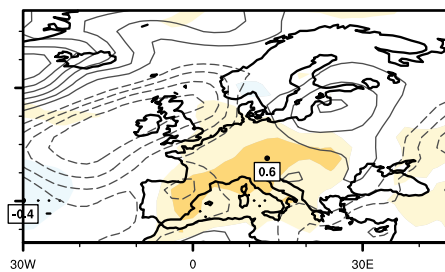

## ModE-RAClim

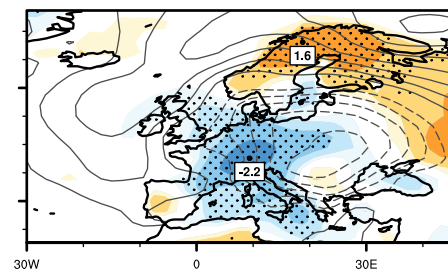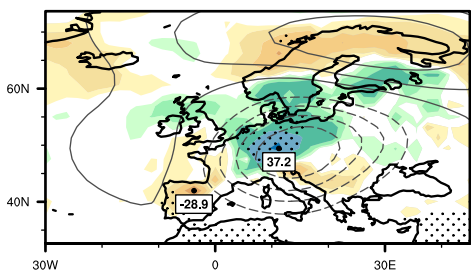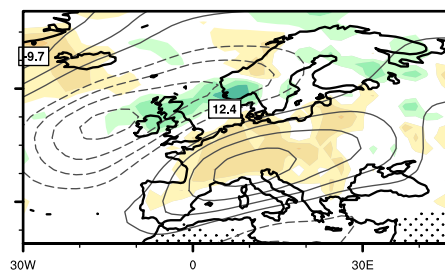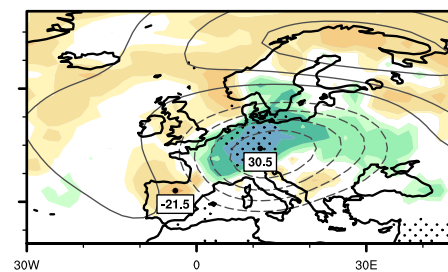

# Summer (JJA) 1666

## ModE-RA

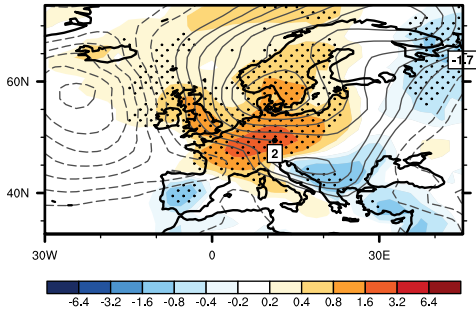

## ModE-Sim

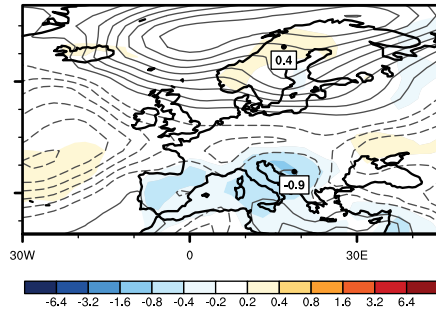

## ModE-RAClim

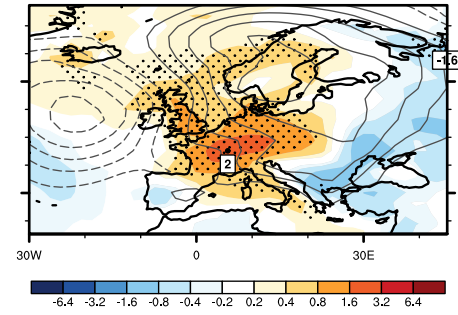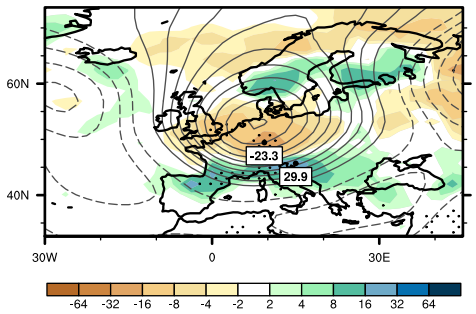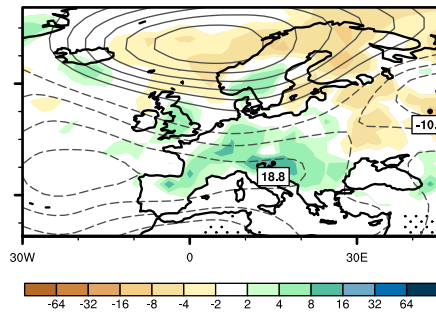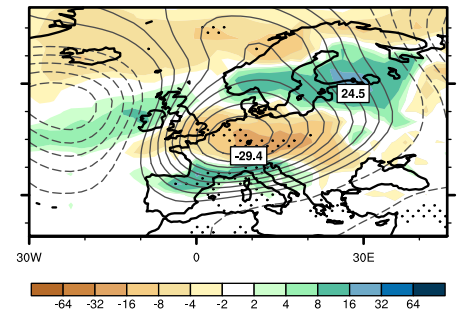

# Summer (JJA) 1675

## ModE-RA

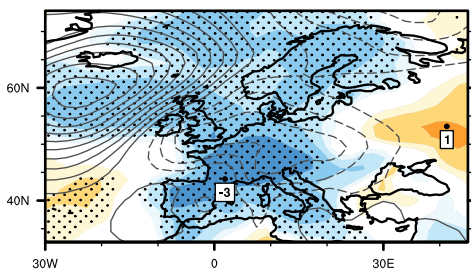

## ModE-Sim

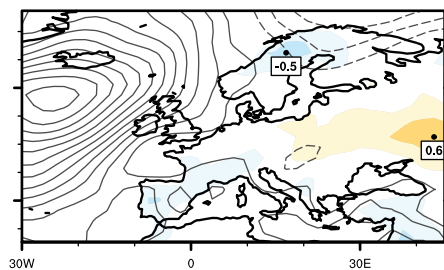

## ModE-RAClim

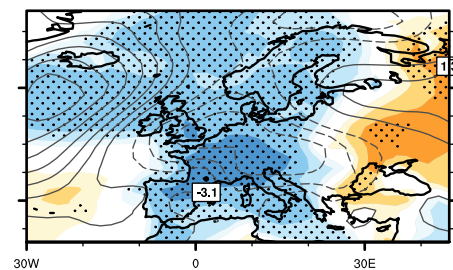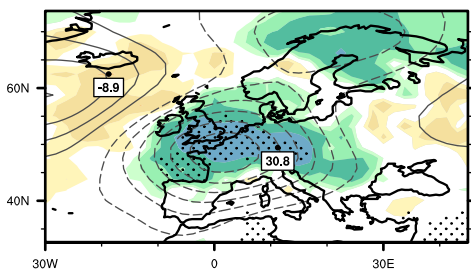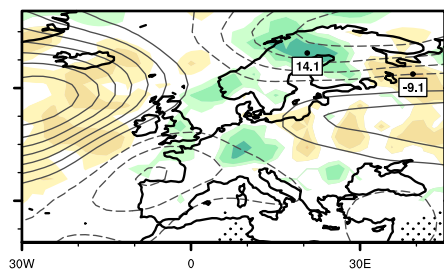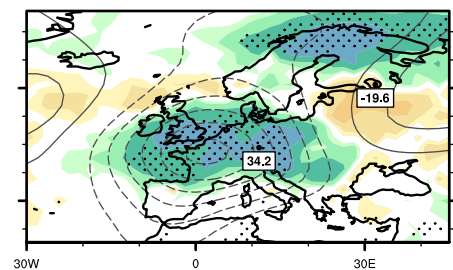

# Summer (JJA) 1684

## ModE-RA

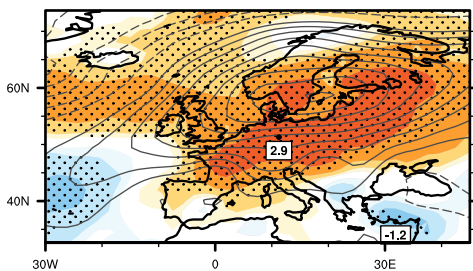

## ModE-Sim

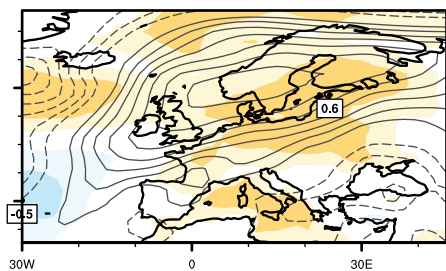

## ModE-RAClim

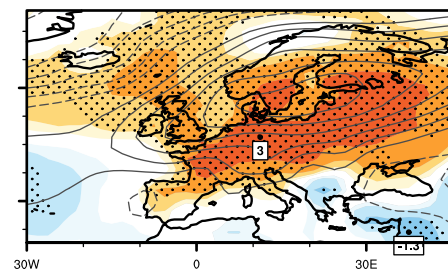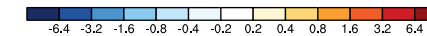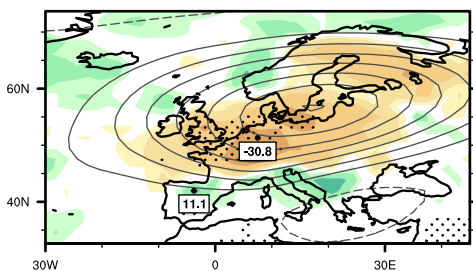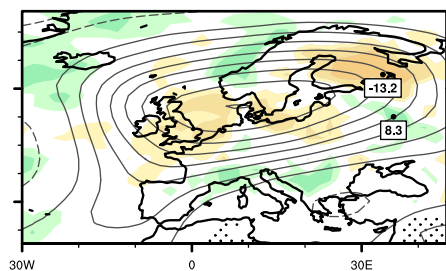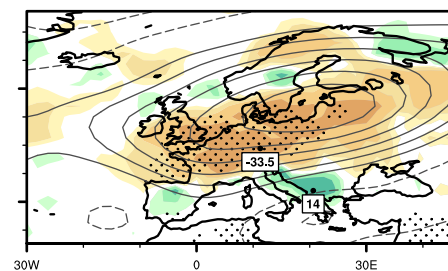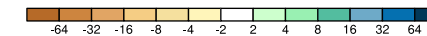

# Summer (JJA) 1692

## ModE-RA

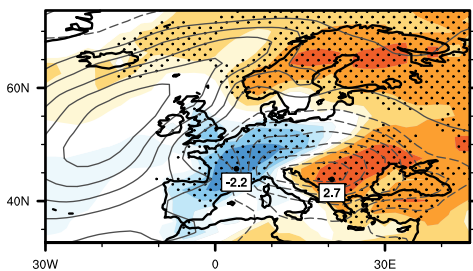

## ModE-Sim

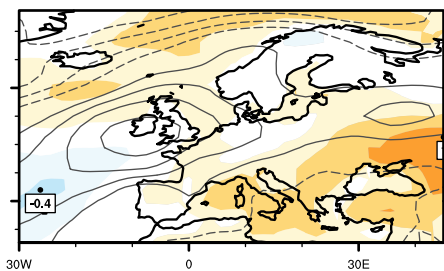

## ModE-RAClim

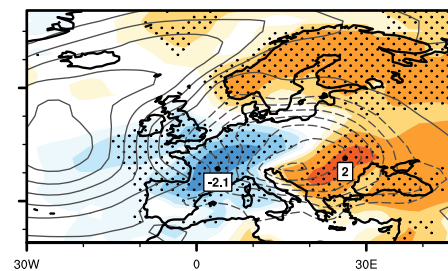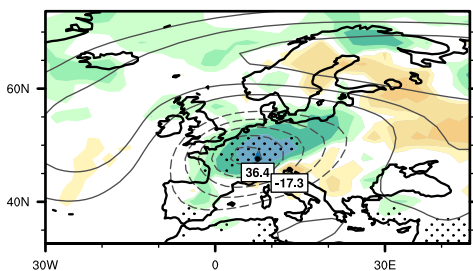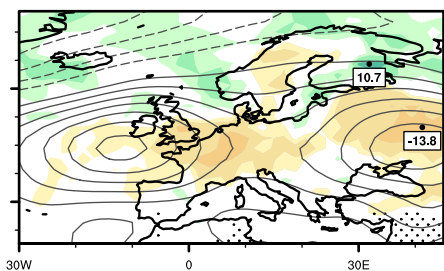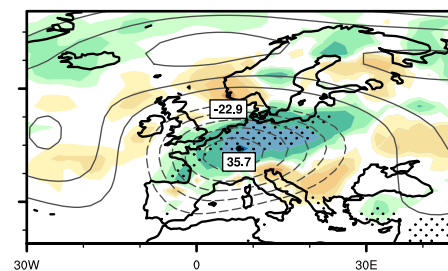

# Summer (JJA) 1706

### ModE-RA

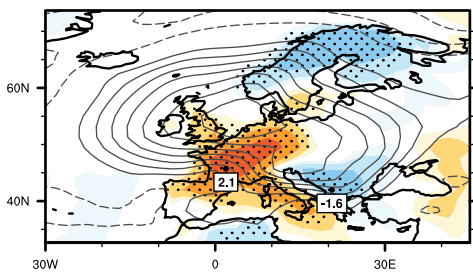

### ModE-Sim

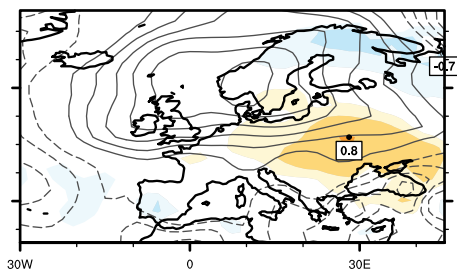

### ModE-RAClim

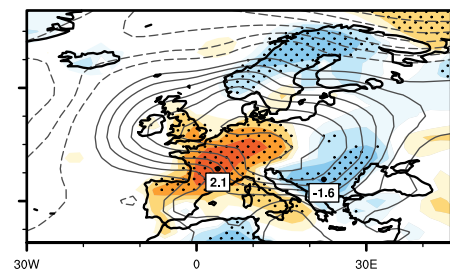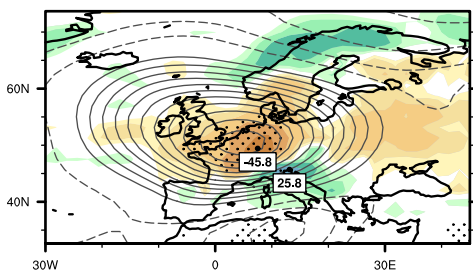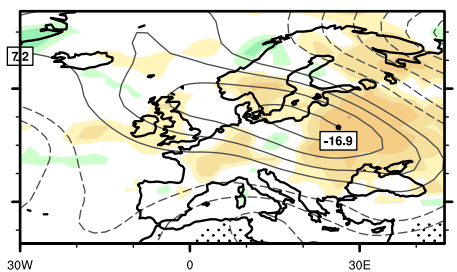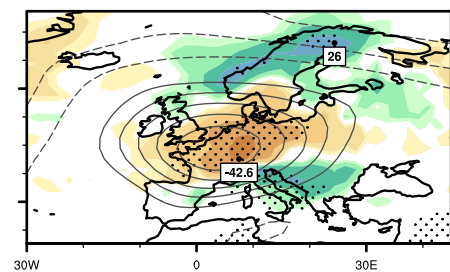

# Summer (JJA) 1713

## ModE-RA

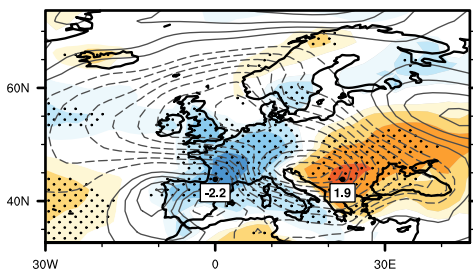

## ModE-Sim

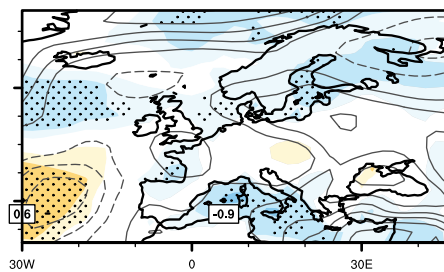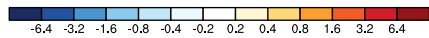

## ModE-RAClim

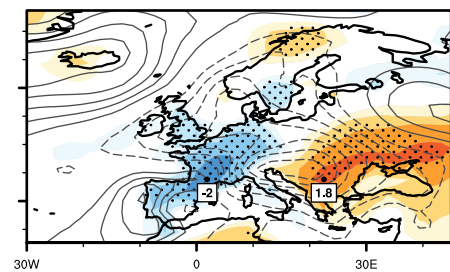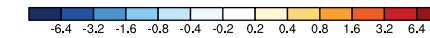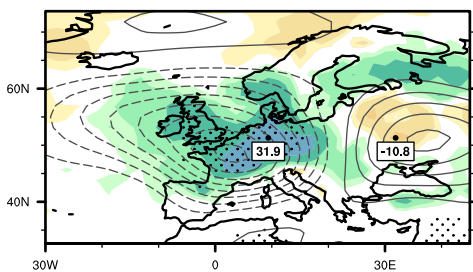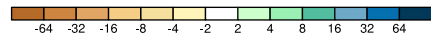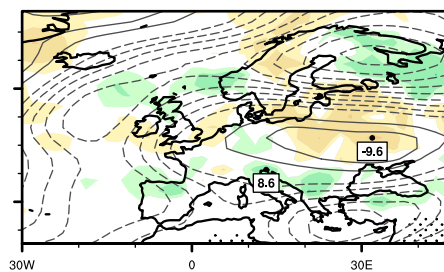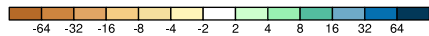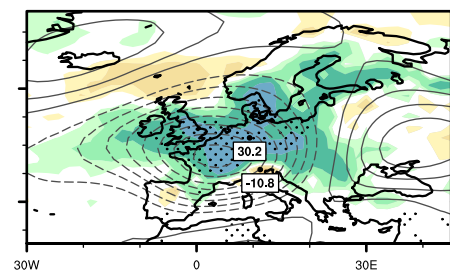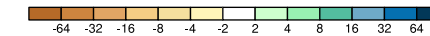

# Summer (JJA) 1719

## ModE-RA

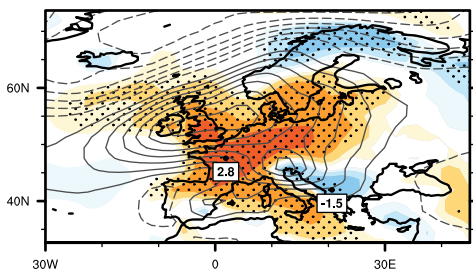

## ModE-Sim

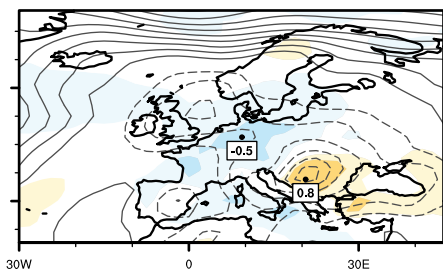

## ModE-RAClim

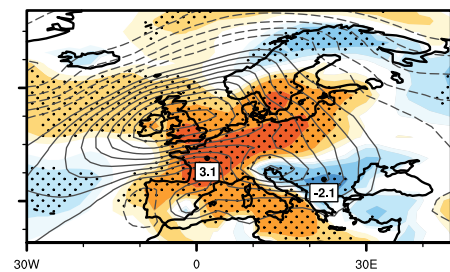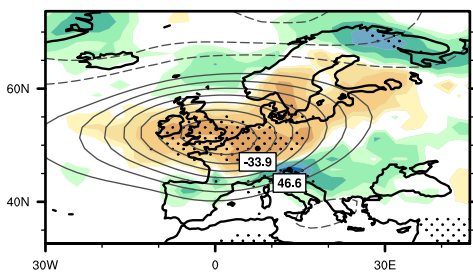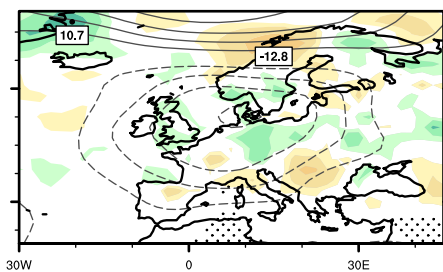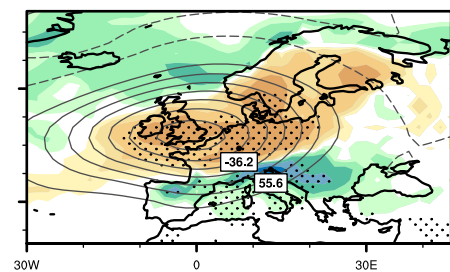

# Summer (JJA) 1725

## ModE-RA

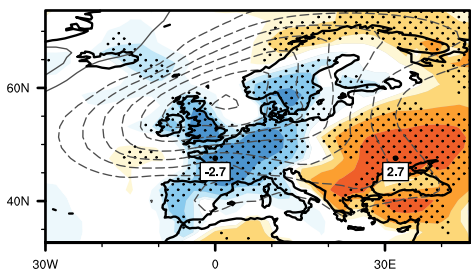

## ModE-Sim

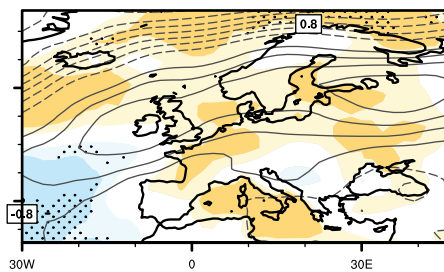

## ModE-RAClim

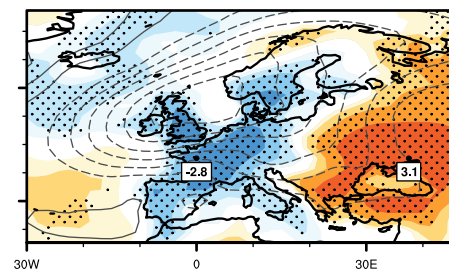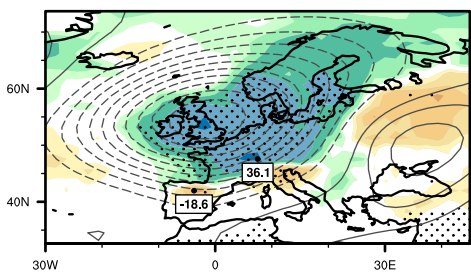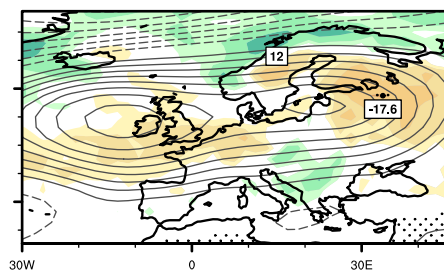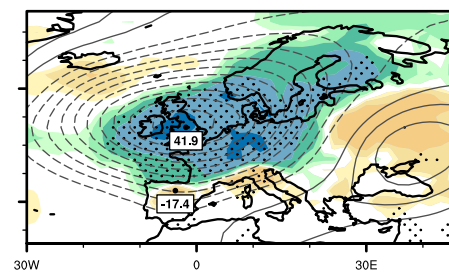

# Summer (JJA) 1816

## ModE-RA

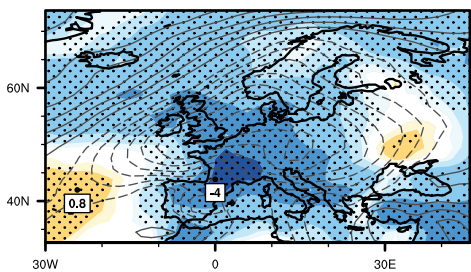

## ModE-Sim

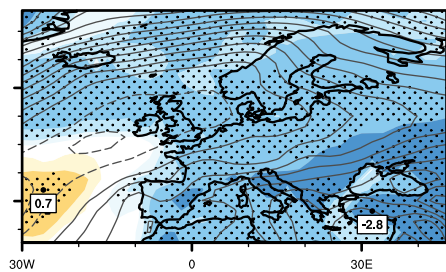

## ModE-RAClim

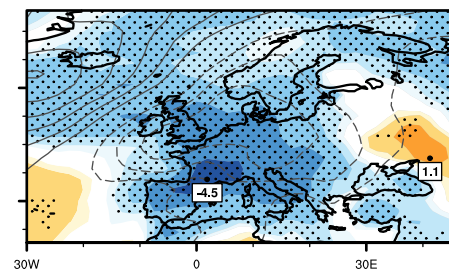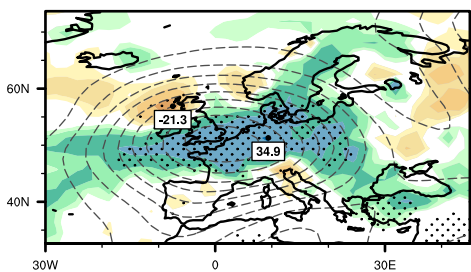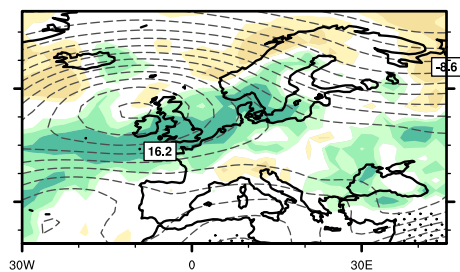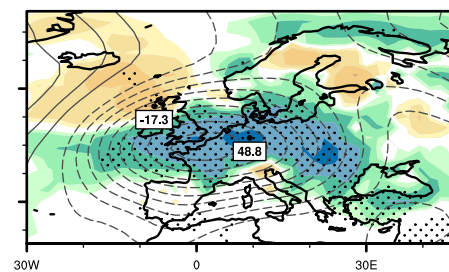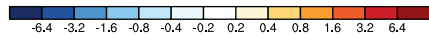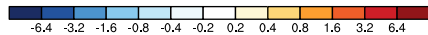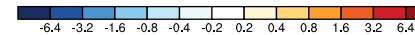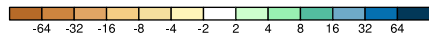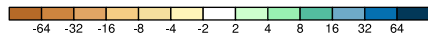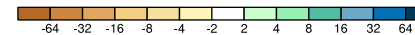

# Summer (JJA) 1821

## ModE-RA

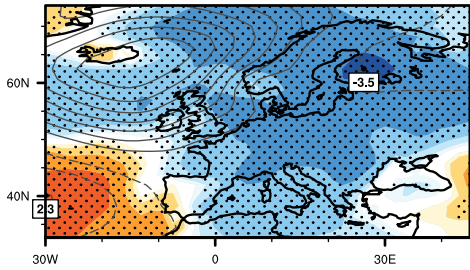

## ModE-Sim

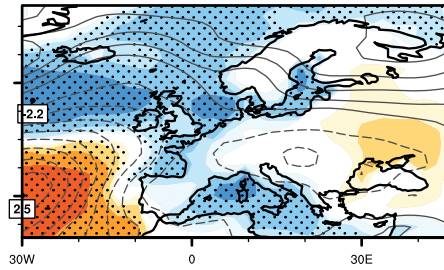

## ModE-RAClim

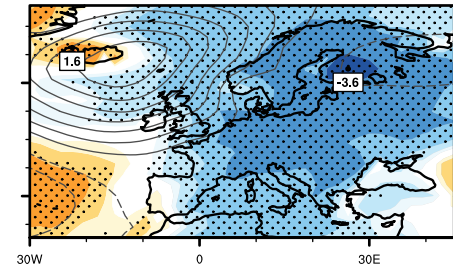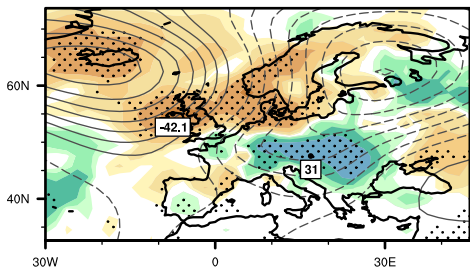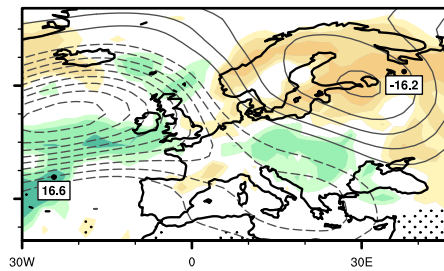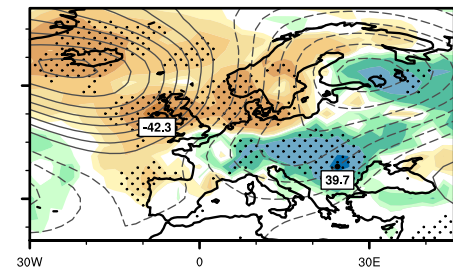

# Summer (JJA) 1859

### ModE-RA

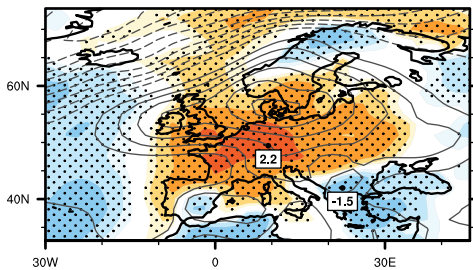

### ModE-Sim

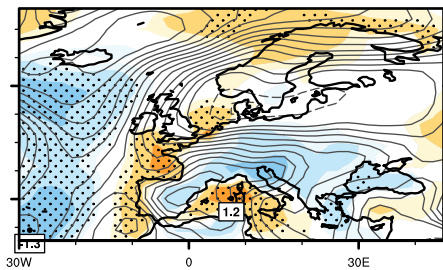

### ModE-RAClim

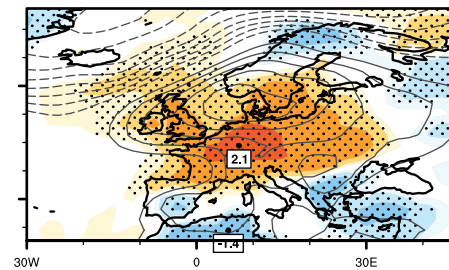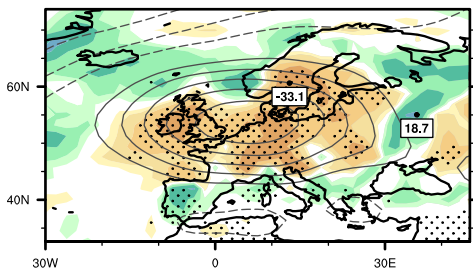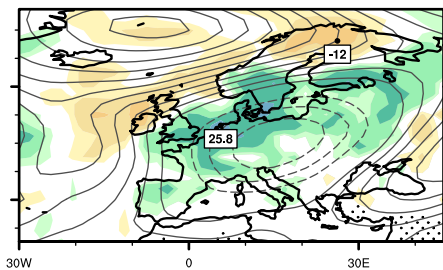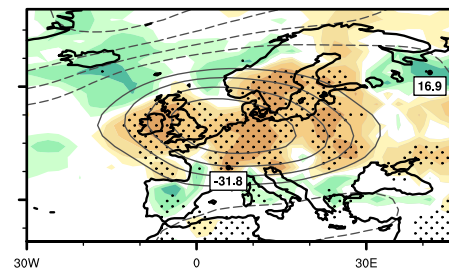

# Summer (JJA) 1913

## ModE-RA

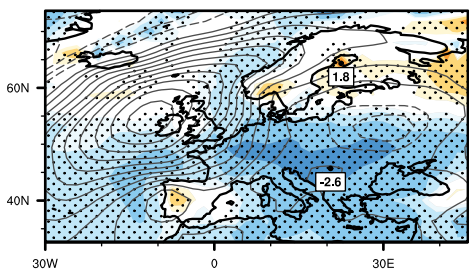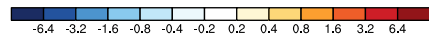

## ModE-Sim

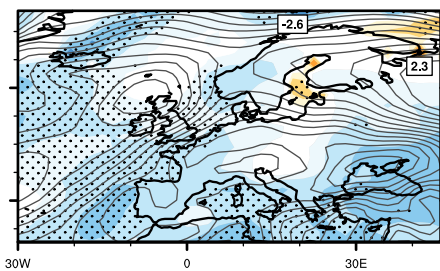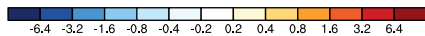

## ModE-RAClim

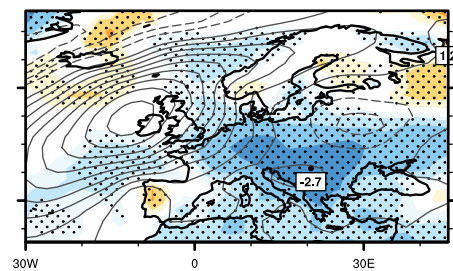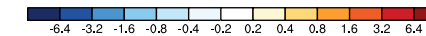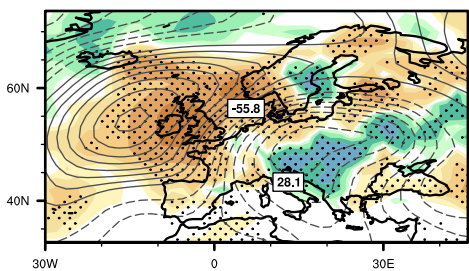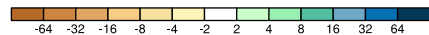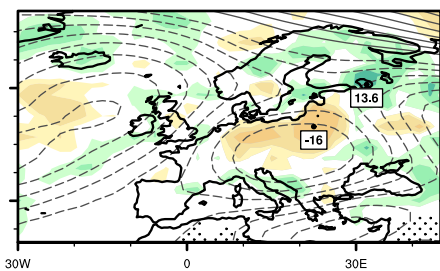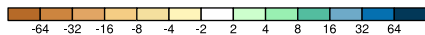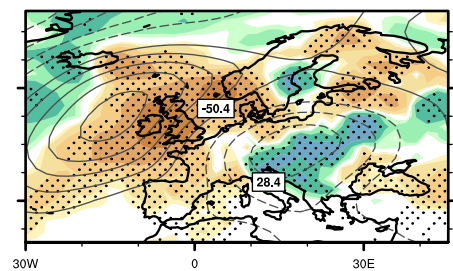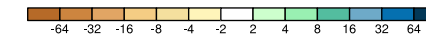

# Summer (JJA) 1916

## ModE-RA

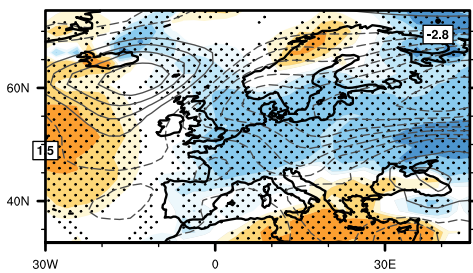

## ModE-Sim

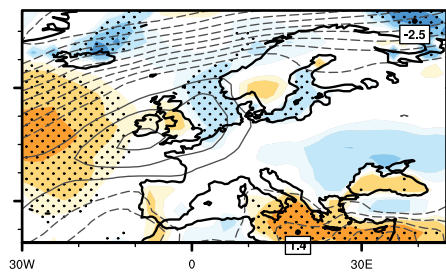

## ModE-RAClim

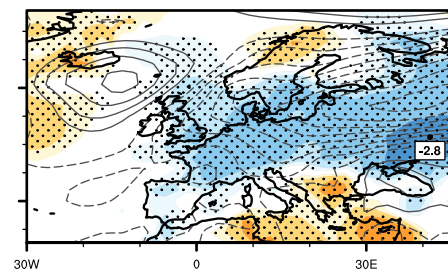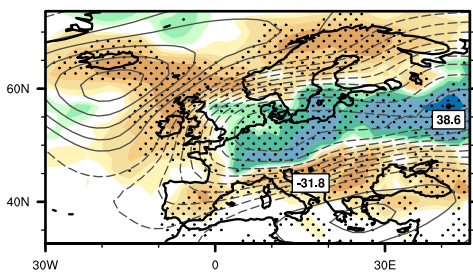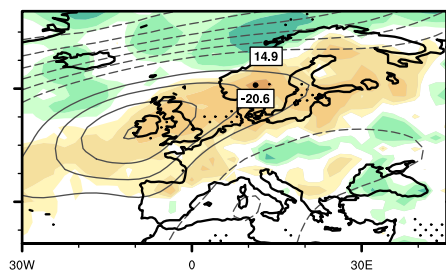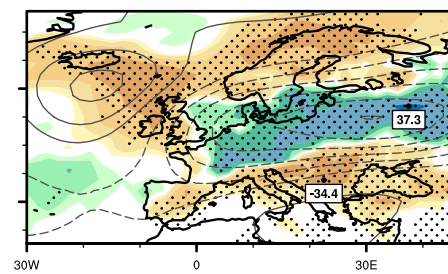

# Summer (JJA) 1947

## ModE-RA

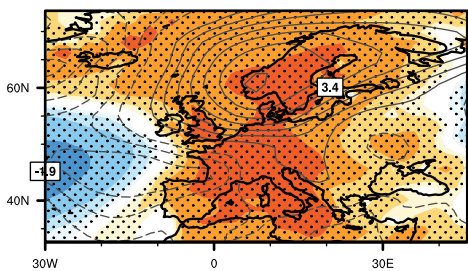

## ModE-Sim

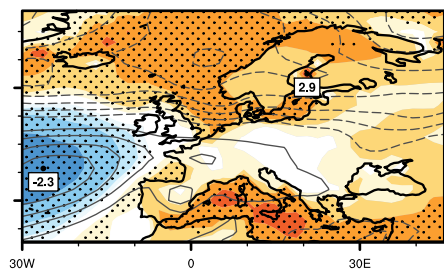

## ModE-RAClim

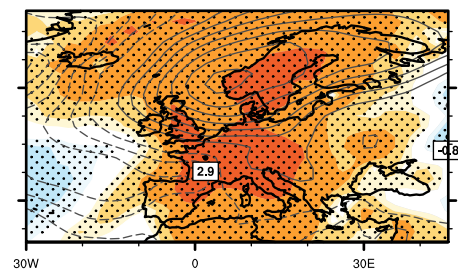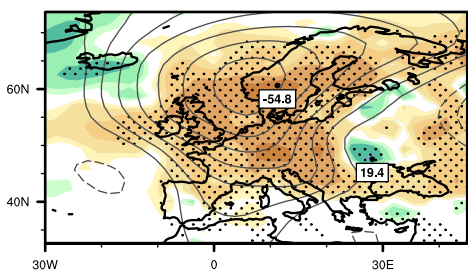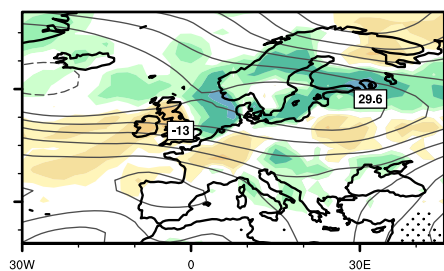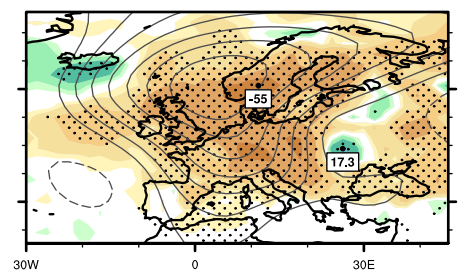

# Summer (JJA) 1956

## ModE-RA

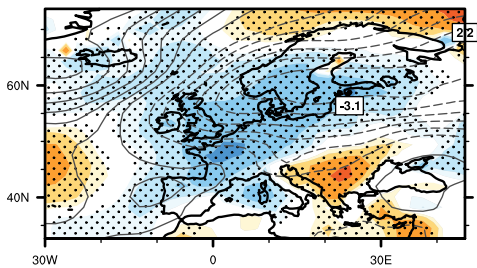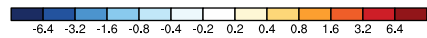

## ModE-Sim

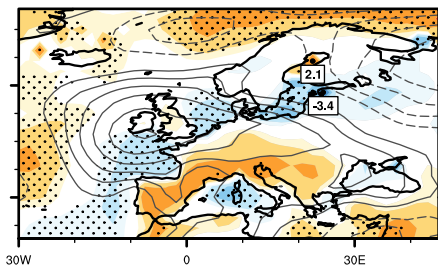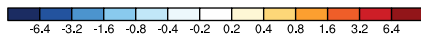

## ModE-RAClim

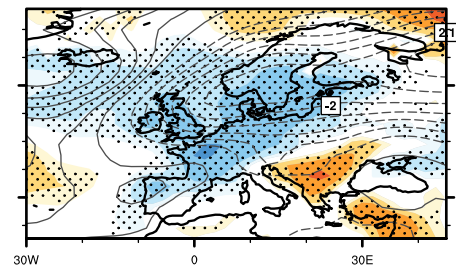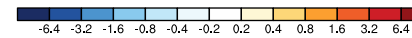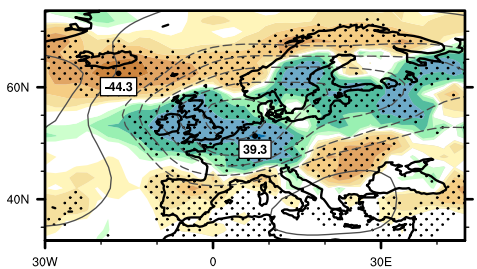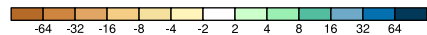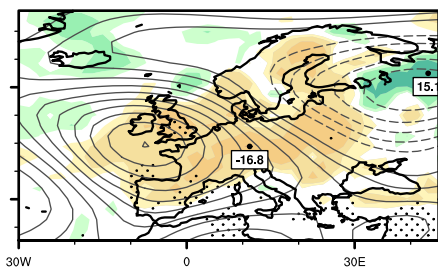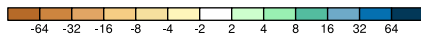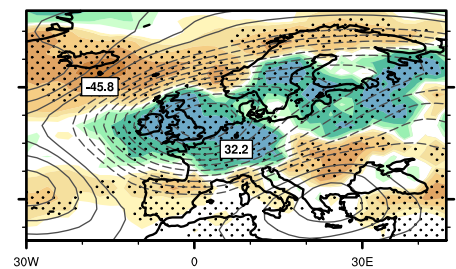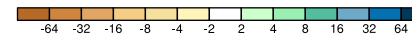

# Autumn (SON) 1444

## ModE-RA

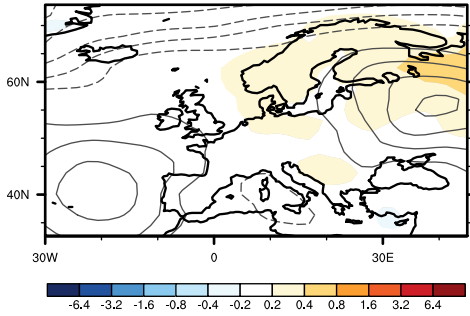

## ModE-Sim

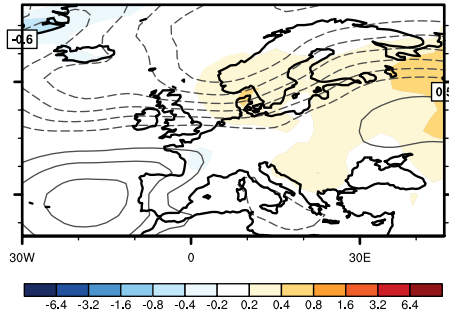

## ModE-RAClim

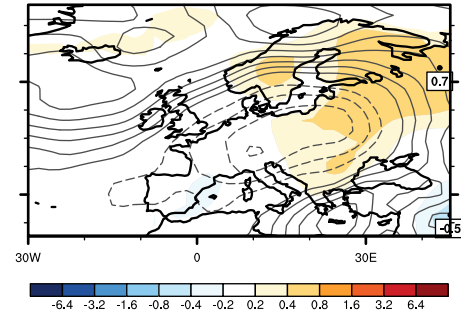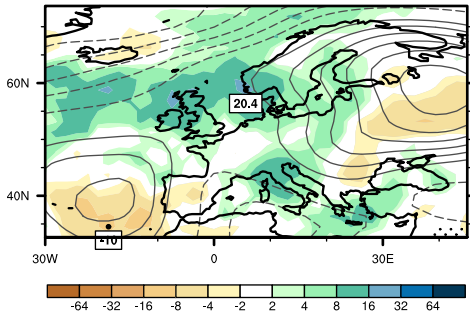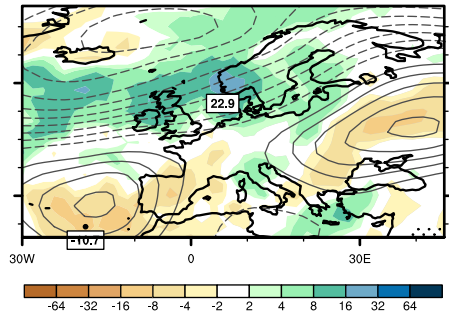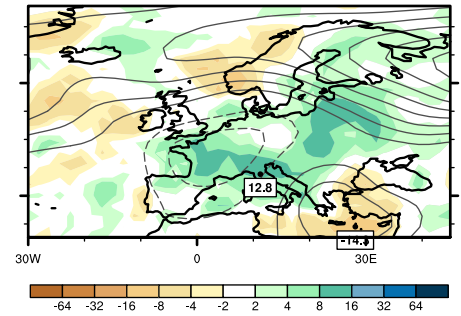

# Autumn (SON) 1447

## ModE-RA

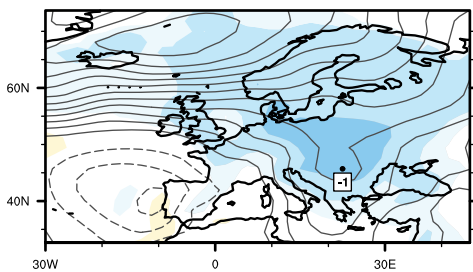

## ModE-Sim

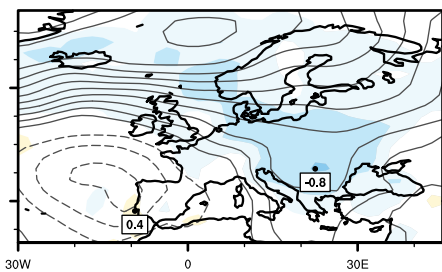

## ModE-RAClim

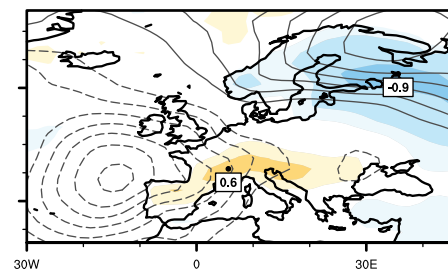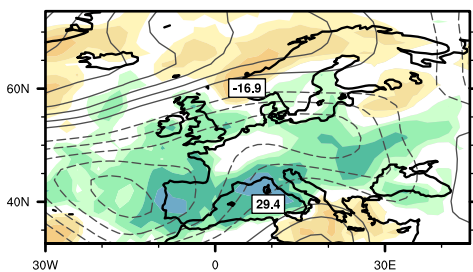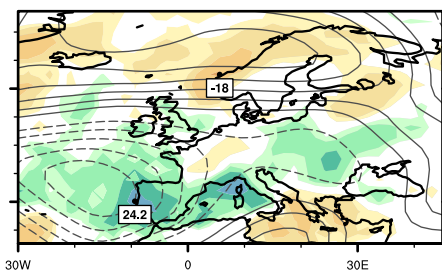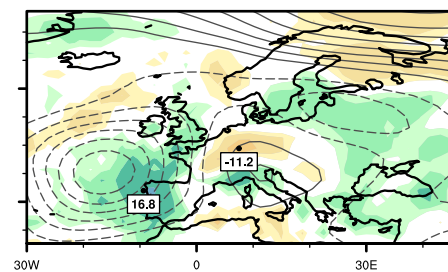

# Autumn (SON) 1455

## ModE-RA

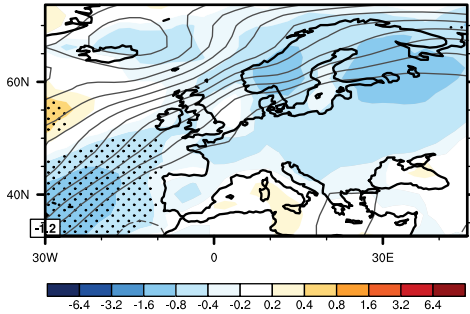

## ModE-Sim

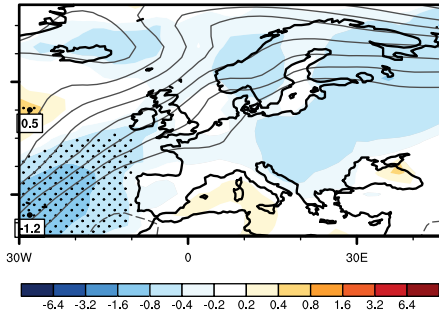

## ModE-RAClim

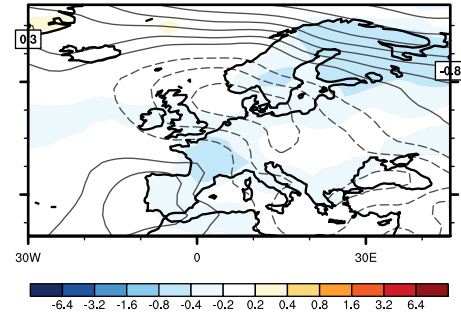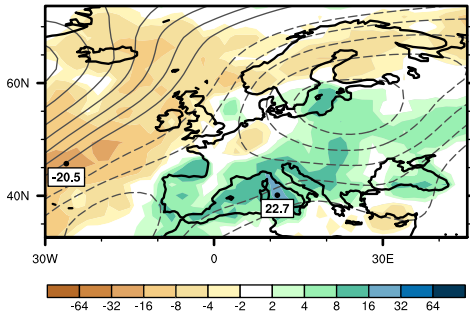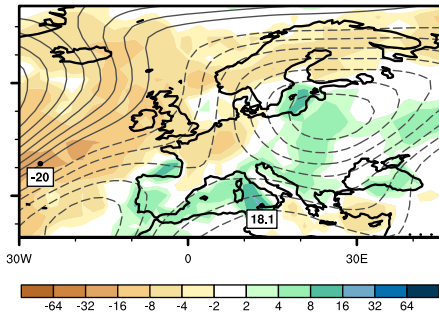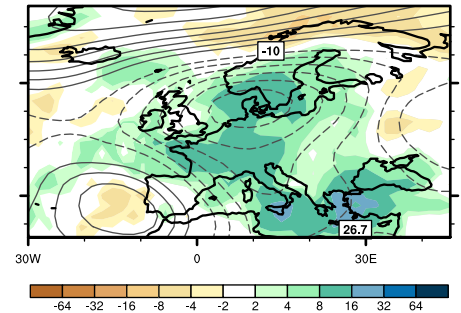

# Autumn (SON) 1468

## ModE-RA

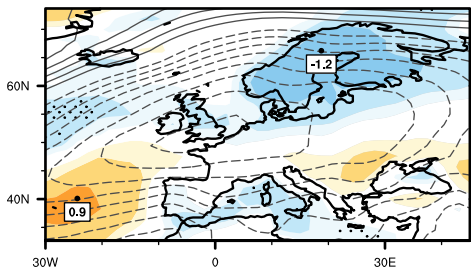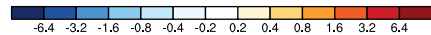

## ModE-Sim

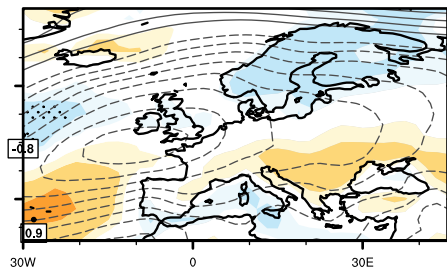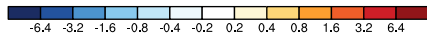

## ModE-RAClim

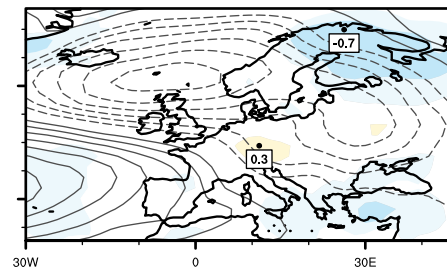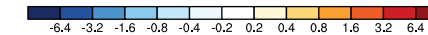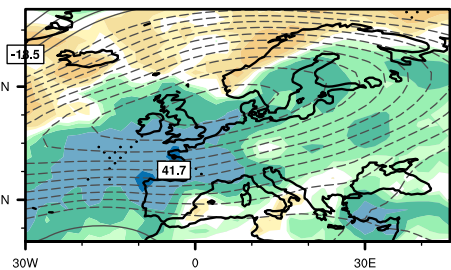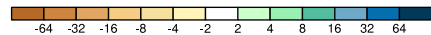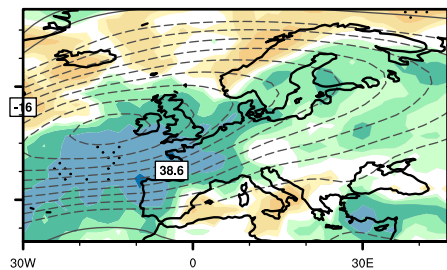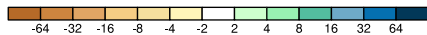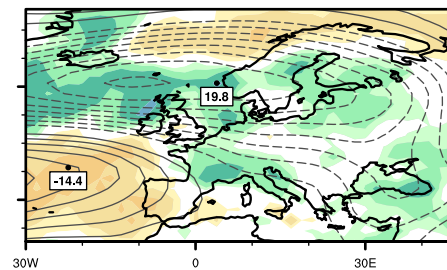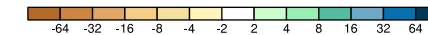

# Autumn (SON) 1473

## ModE-RA

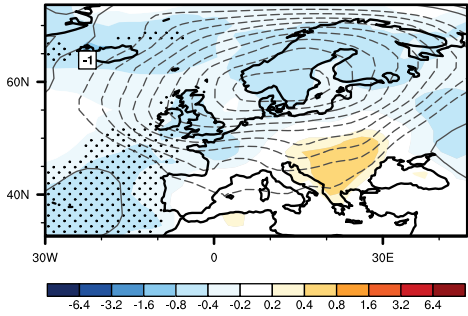

## ModE-Sim

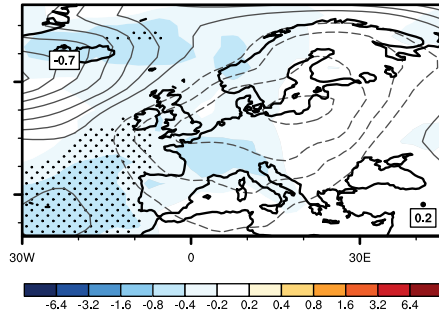

## ModE-RAClim

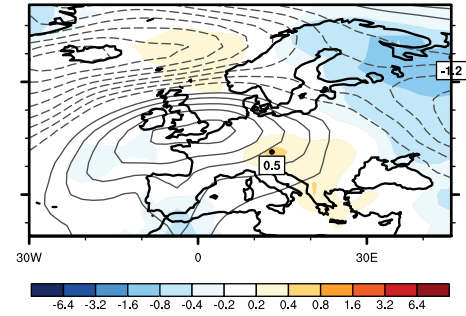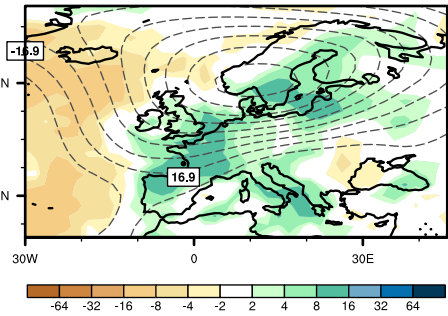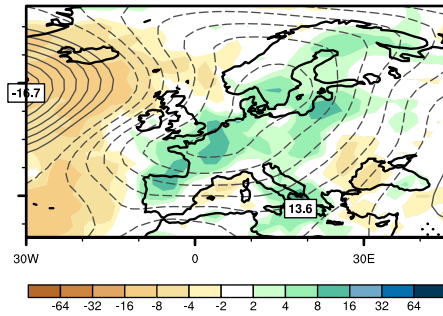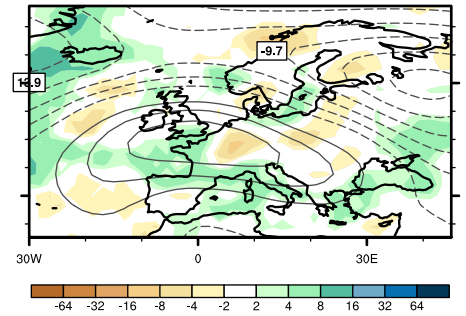

# Autumn (SON) 1477

## ModE-RA

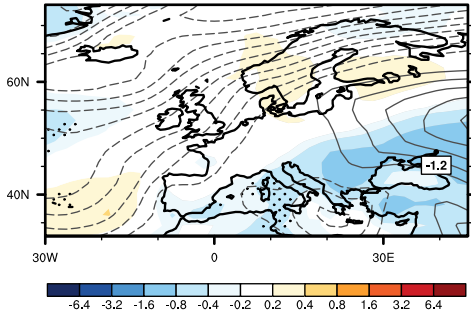

## ModE-Sim

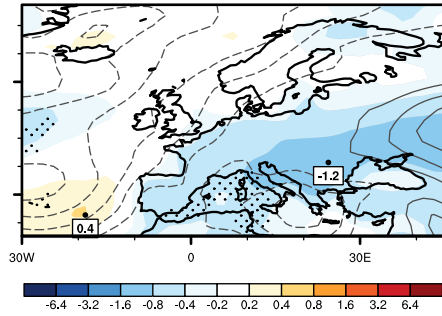

## ModE-RAClim

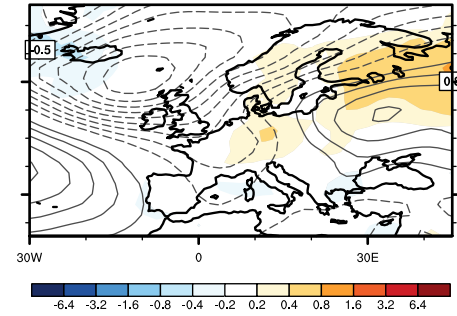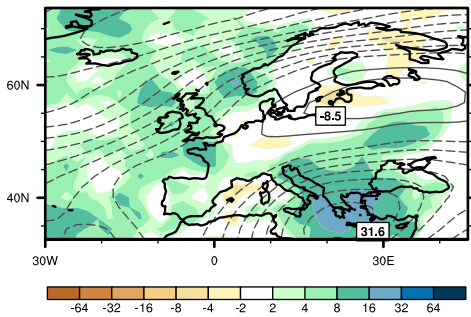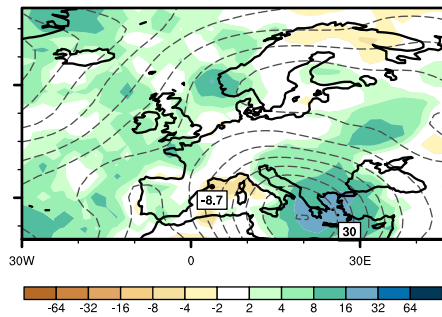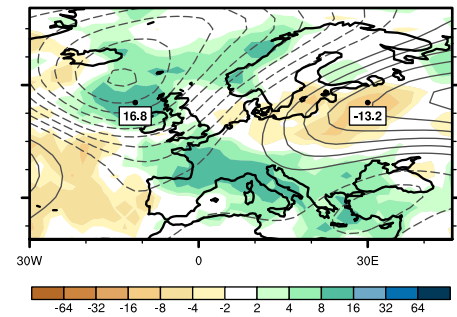

# Autumn (SON) 1479

## ModE-RA

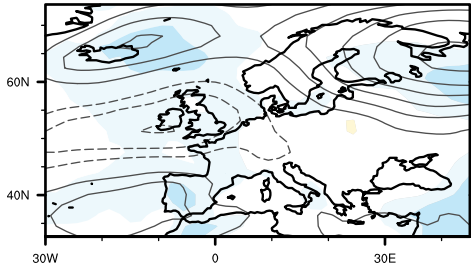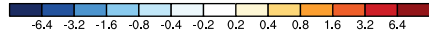

## ModE-Sim

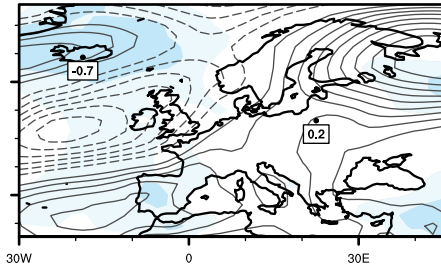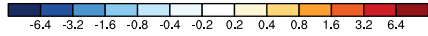

## ModE-RAClim

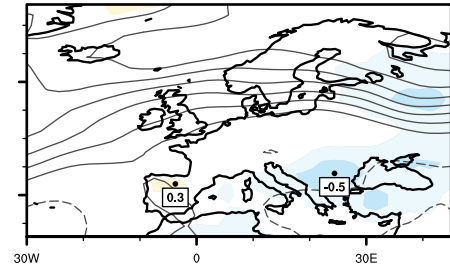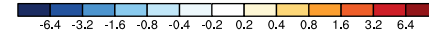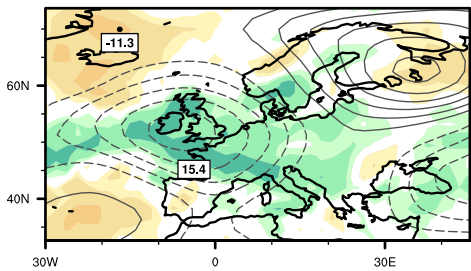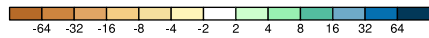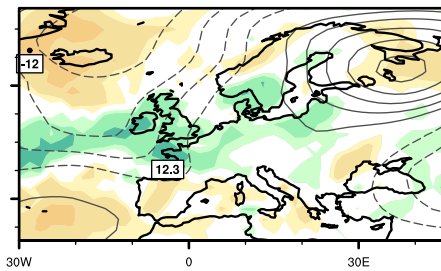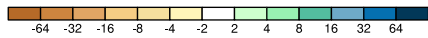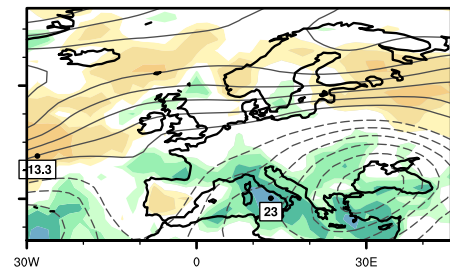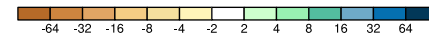

# Autumn (SON) 1482

## ModE-RA

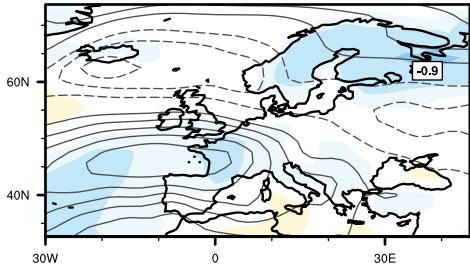

## ModE-Sim

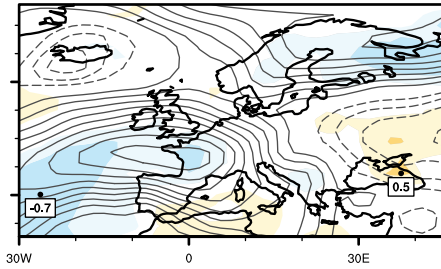

## ModE-RAClim

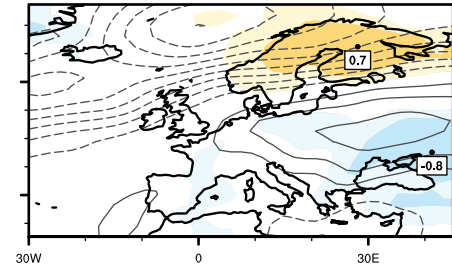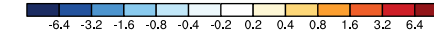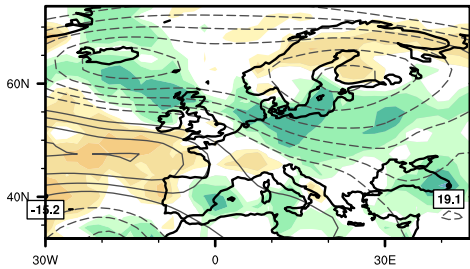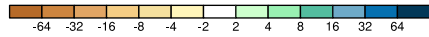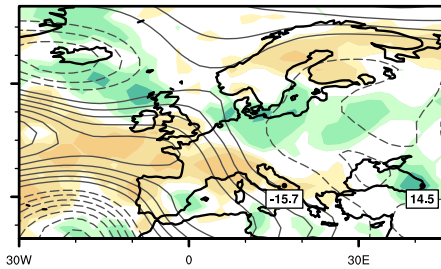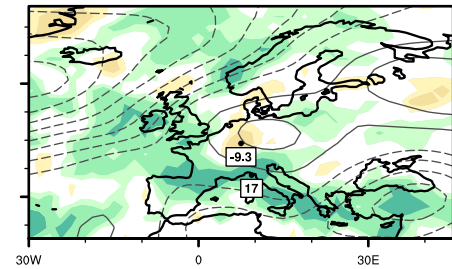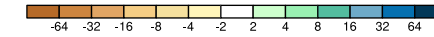

# Autumn (SON) 1495

## ModE-RA

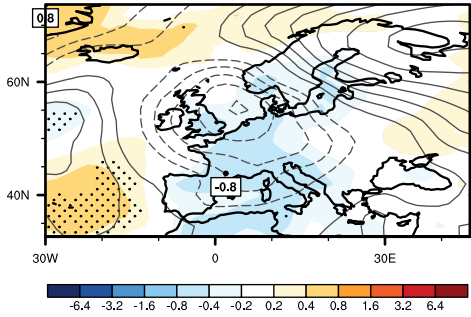

## ModE-Sim

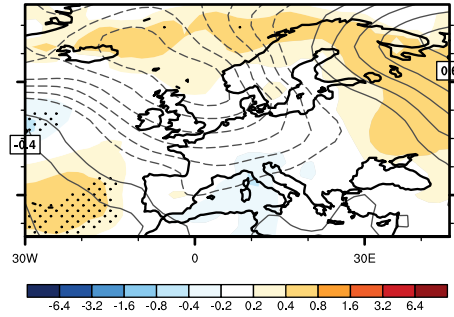

## ModE-RAClim

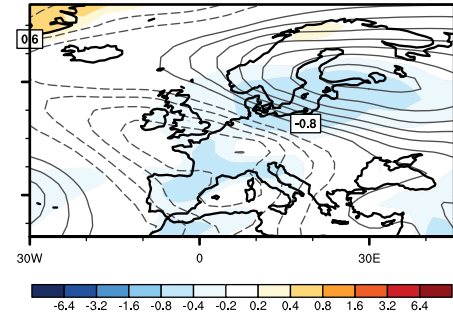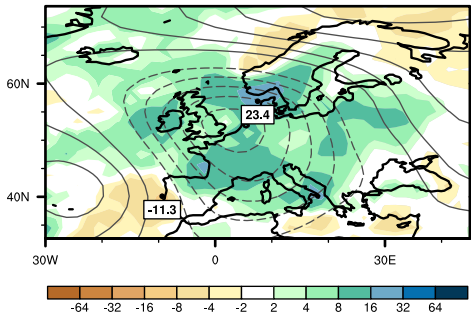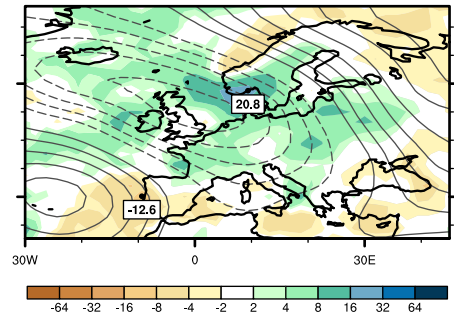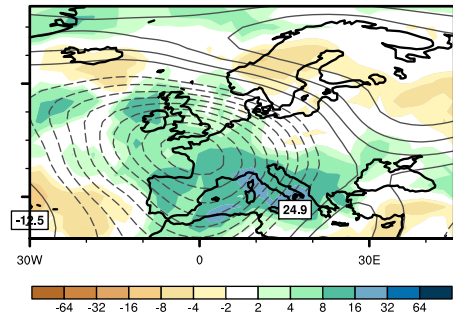

# Autumn (SON) 1536

## ModE-RA

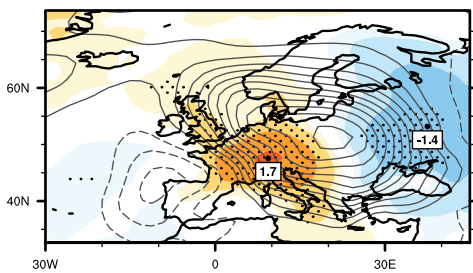

## ModE-Sim

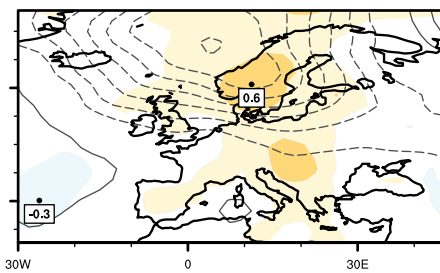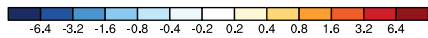

## ModE-RAClim

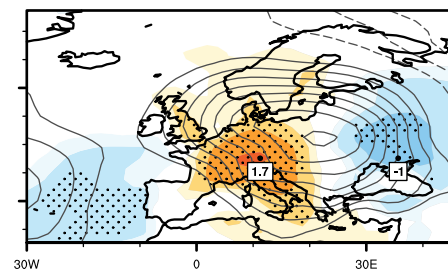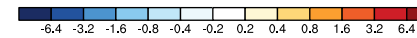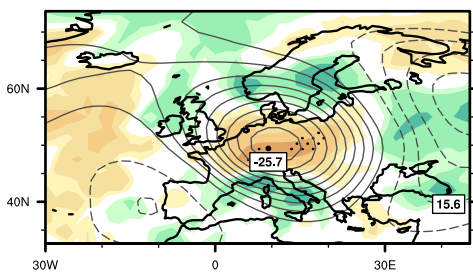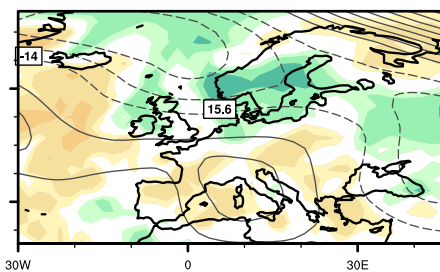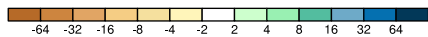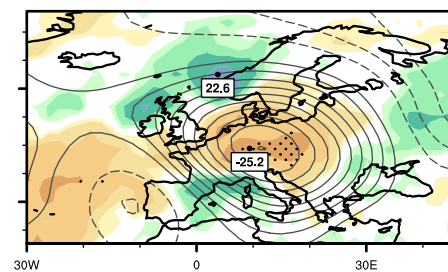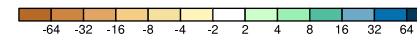

# Autumn (SON) 1540

## ModE-RA

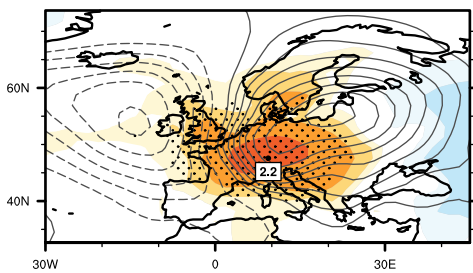

## ModE-Sim

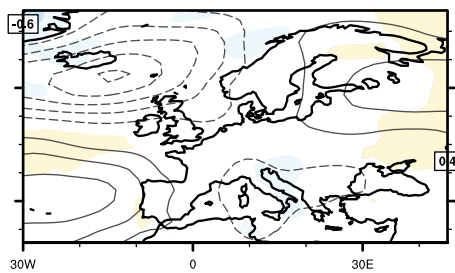

## ModE-RAClim

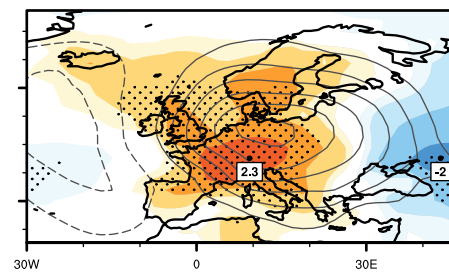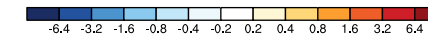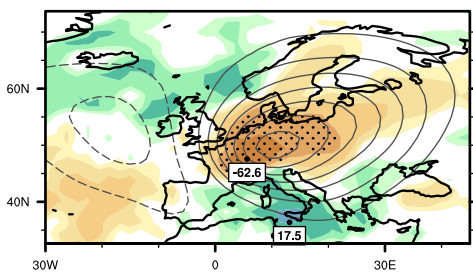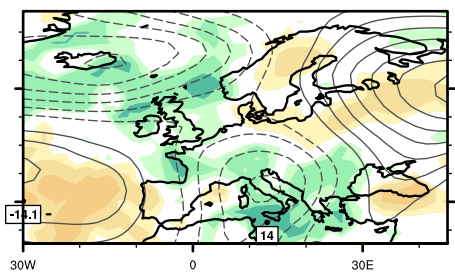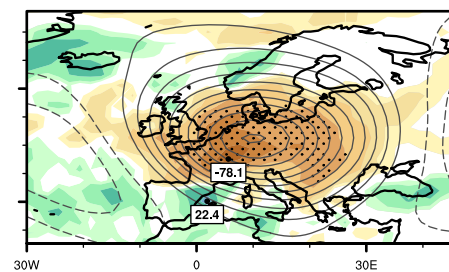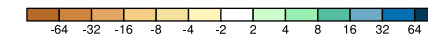

# Autumn (SON) 1579

## ModE-RA

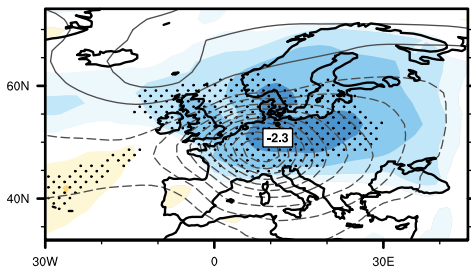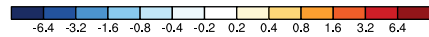

## ModE-Sim

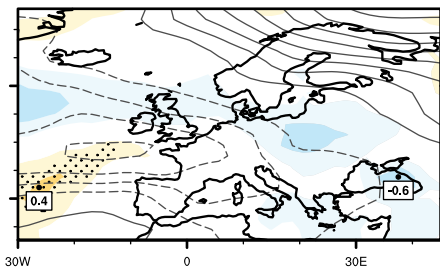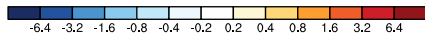

## ModE-RAClim

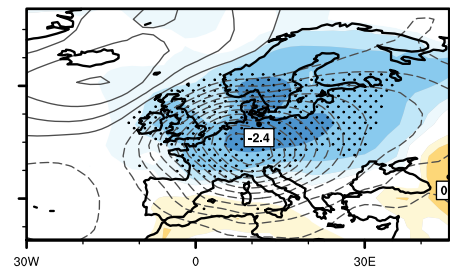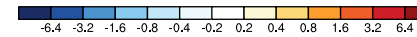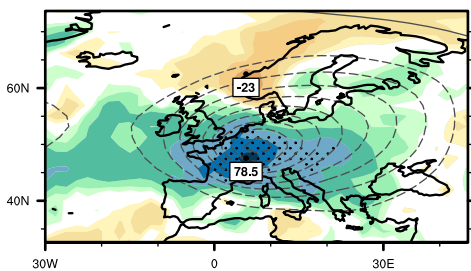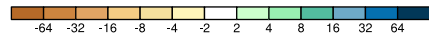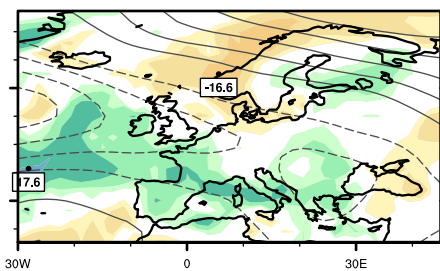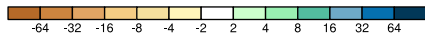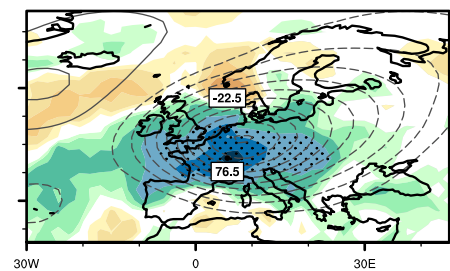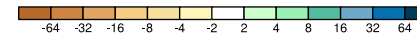

# Autumn (SON) 1597

## ModE-RA

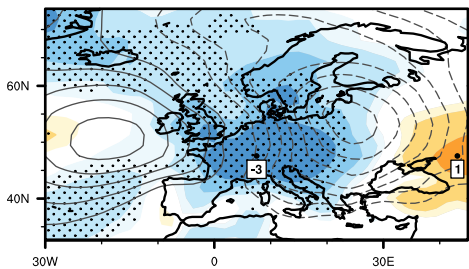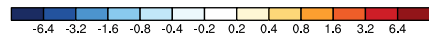

## ModE-Sim

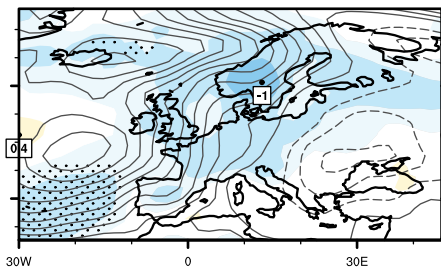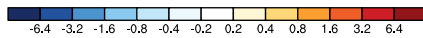

## ModE-RAClim

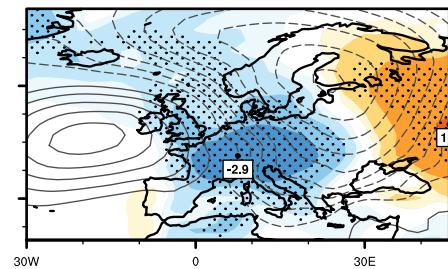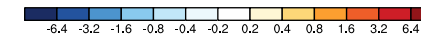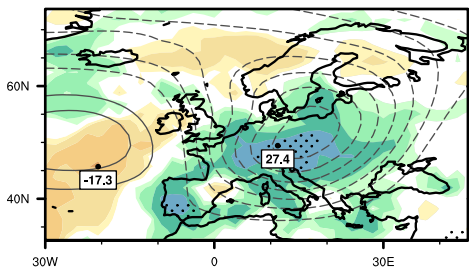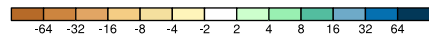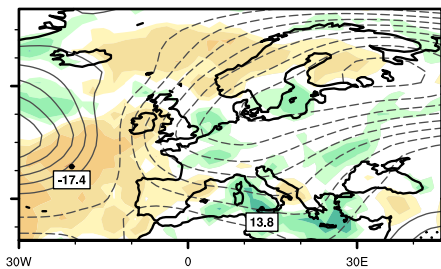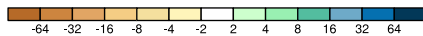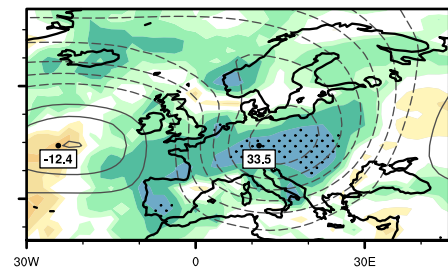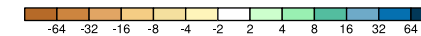

# Autumn (SON) 1601

## ModE-RA

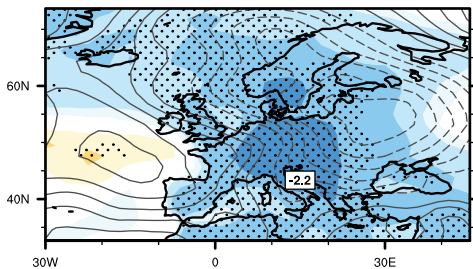

## ModE-Sim

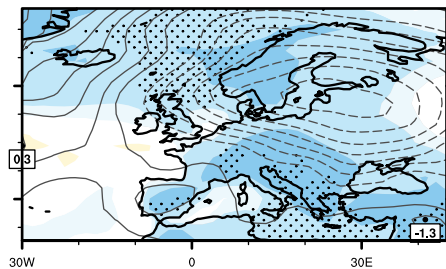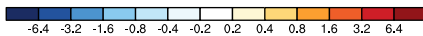

## ModE-RAClim

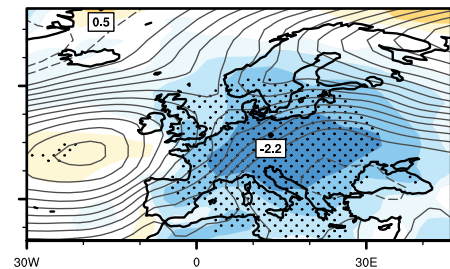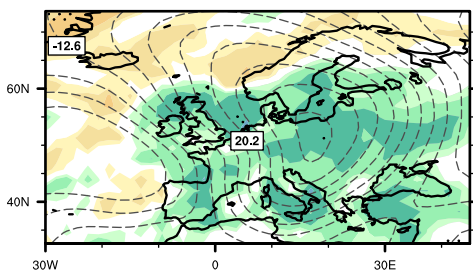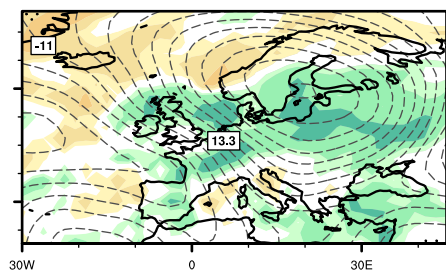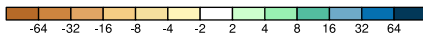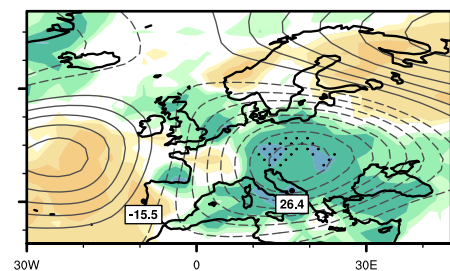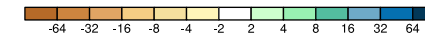

# Autumn (SON) 1676

## ModE-RA

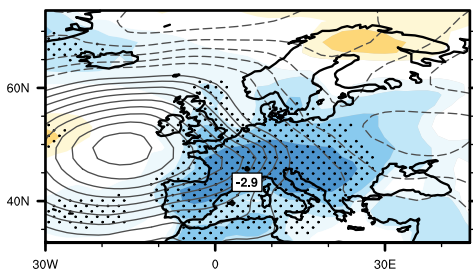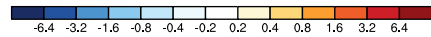

## ModE-Sim

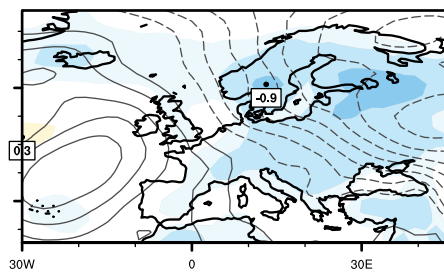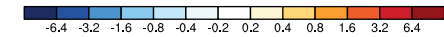

## ModE-RAClim

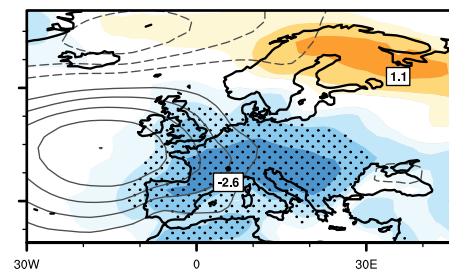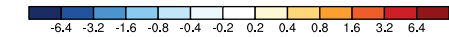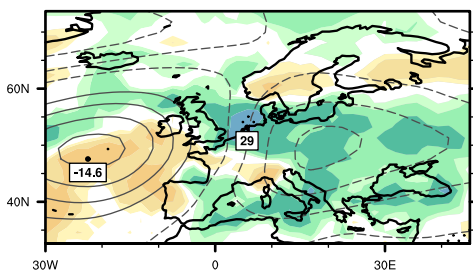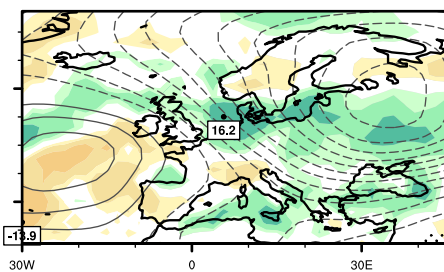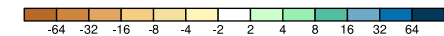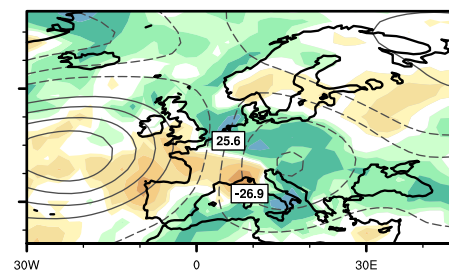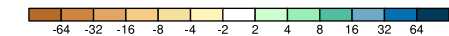

# Autumn (SON) 1680

## ModE-RA

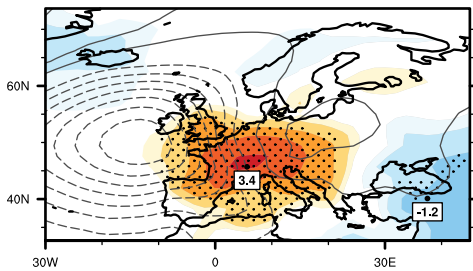

## ModE-Sim

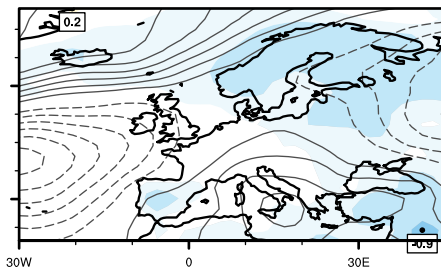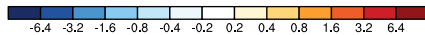

## ModE-RAClim

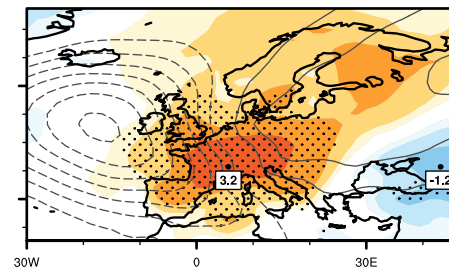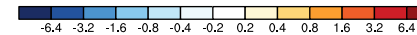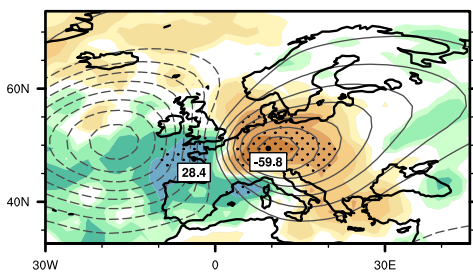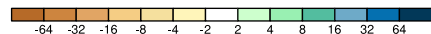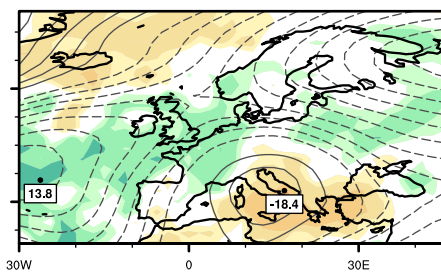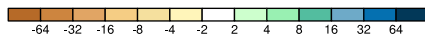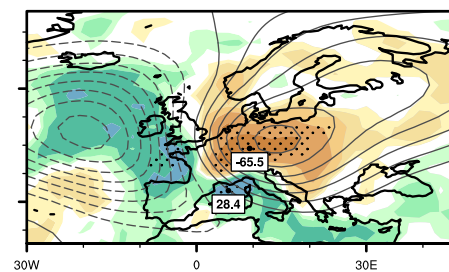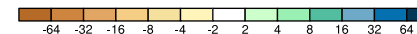

# Autumn (SON) 1731

## ModE-RA

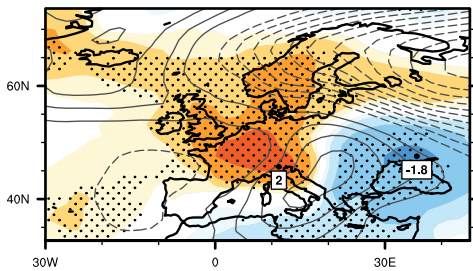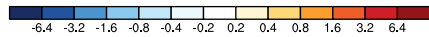

## ModE-Sim

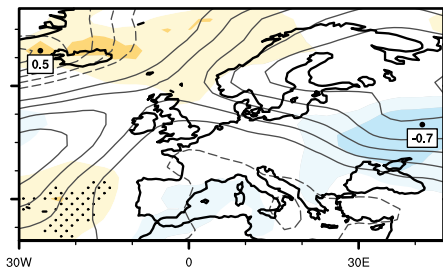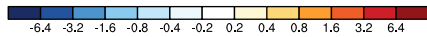

## ModE-RAClim

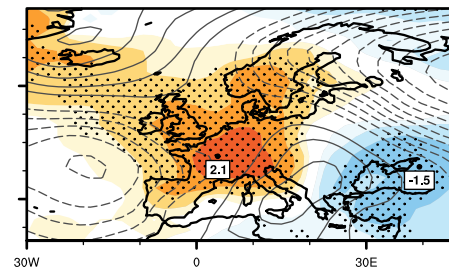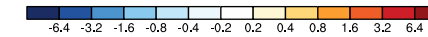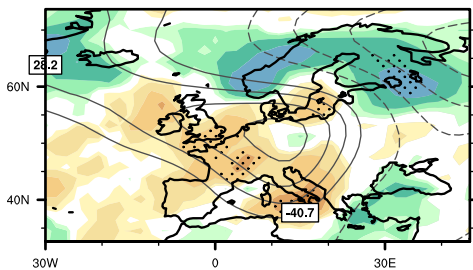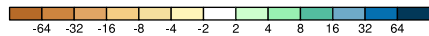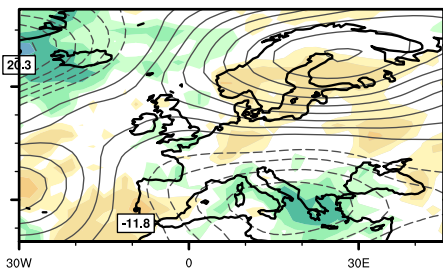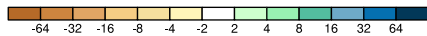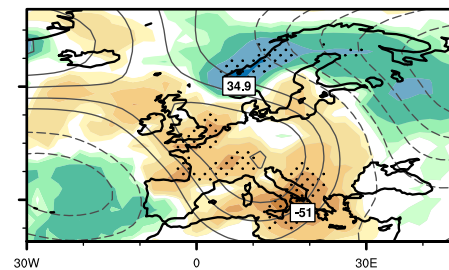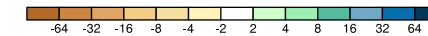

# Autumn (SON) 1786

## ModE-RA

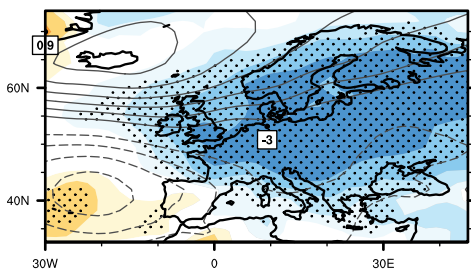

## ModE-Sim

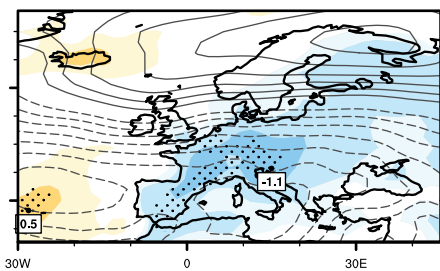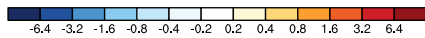

## ModE-RAClim

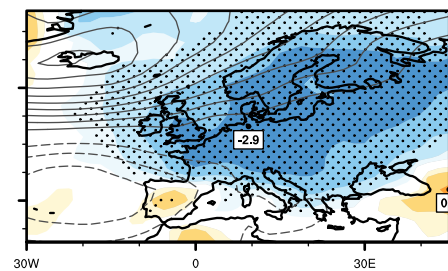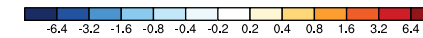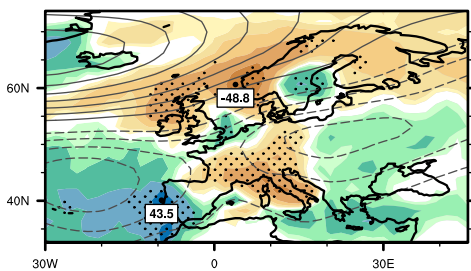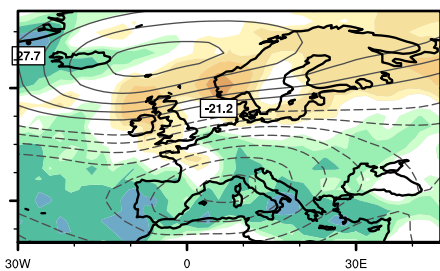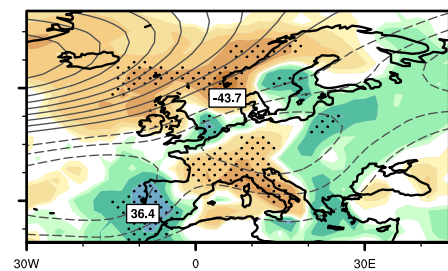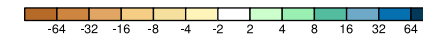

# Autumn (SON) 1811

## ModE-RA

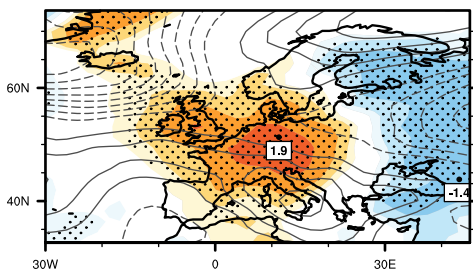

## ModE-Sim

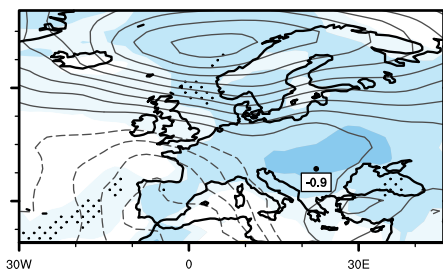

## ModE-RAClim

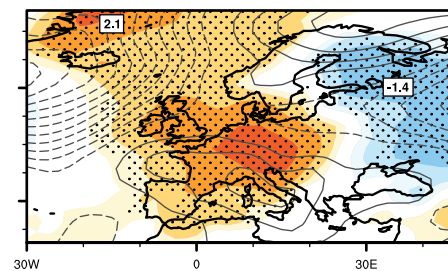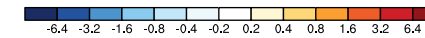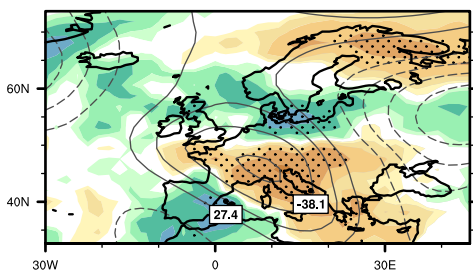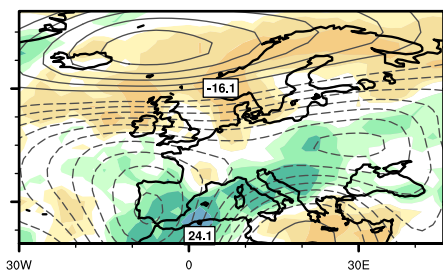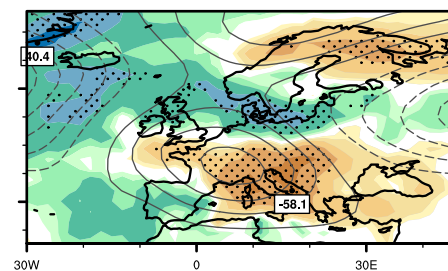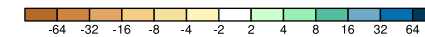

# Autumn (SON) 1829

## ModE-RA

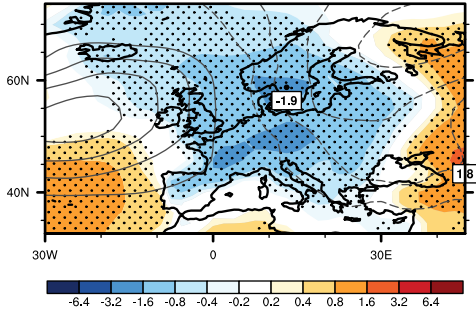

## ModE-Sim

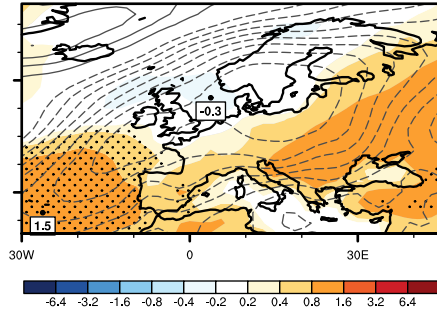

## ModE-RAClim

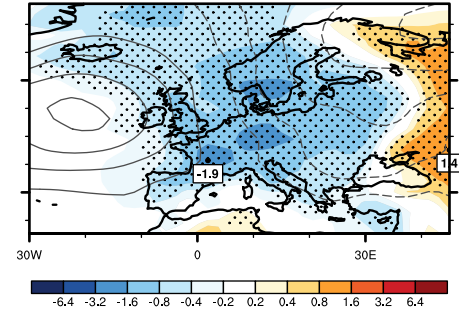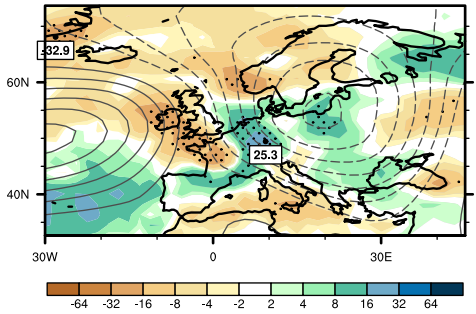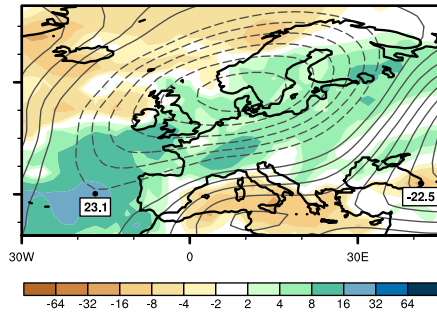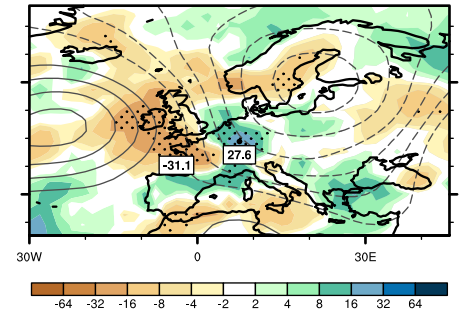

# Autumn (SON) 1842

## ModE-RA

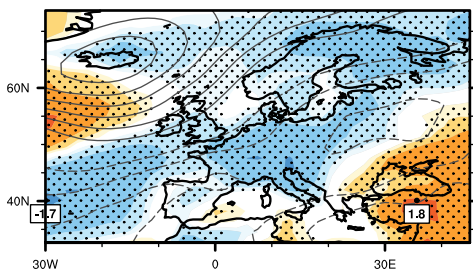

## ModE-Sim

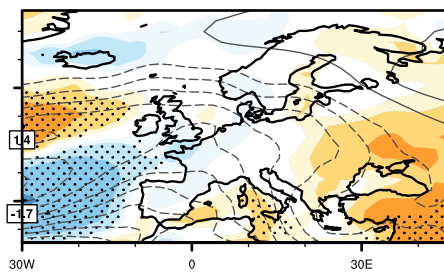

## ModE-RAClim

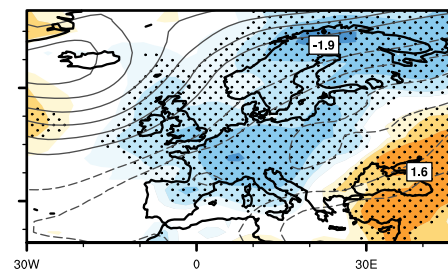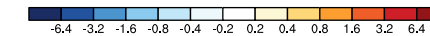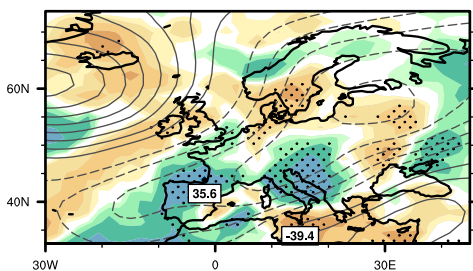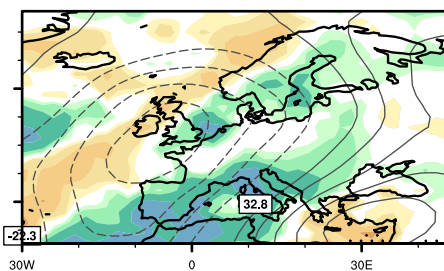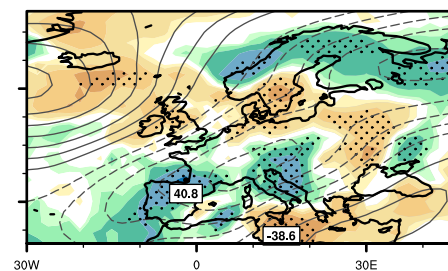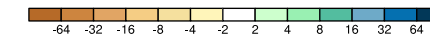

# Autumn (SON) 1912

## ModE-RA

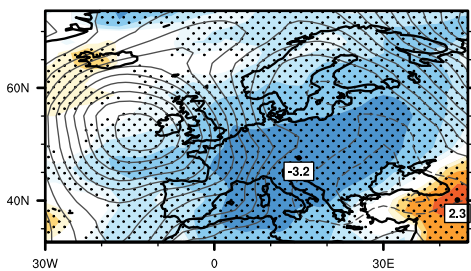

## ModE-Sim

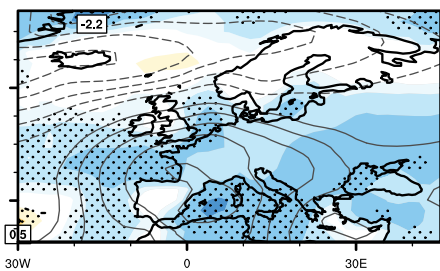

## ModE-RAClim

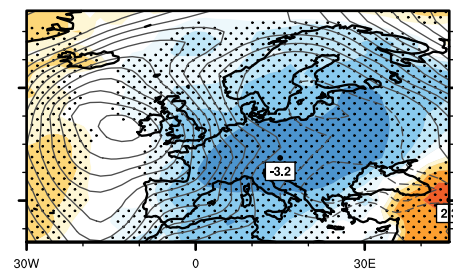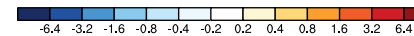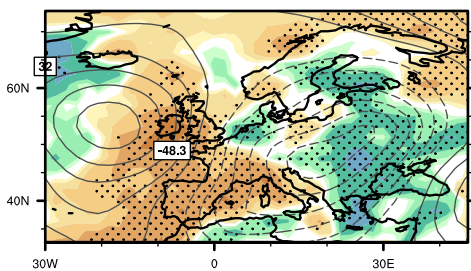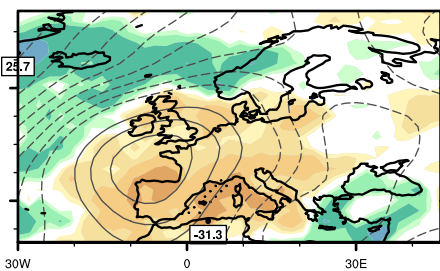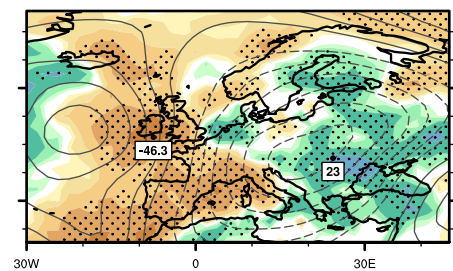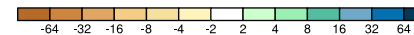

# Autumn (SON) 1947

## ModE-RA

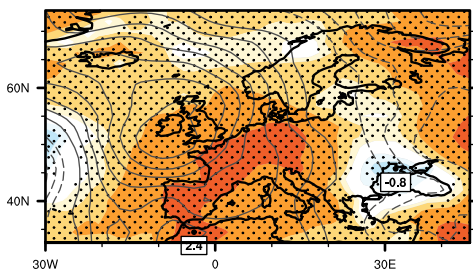

## ModE-Sim

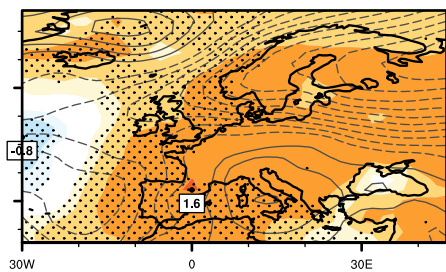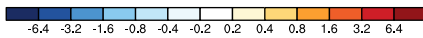

## ModE-RAClim

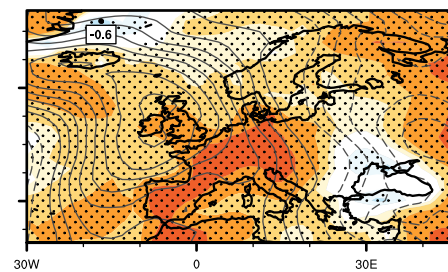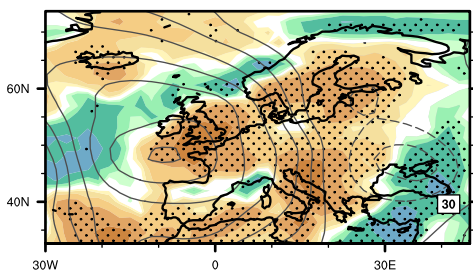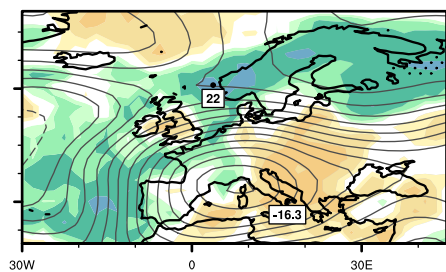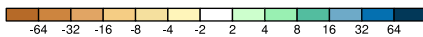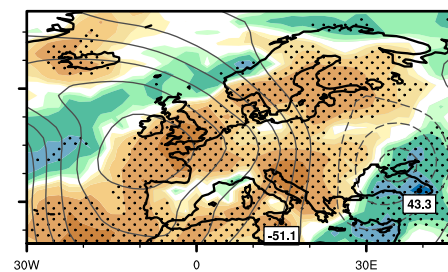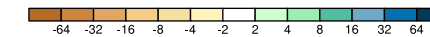

Supplement: Supplementary file 1 [file egusphere-2026-2852-supplement.pdf]
